# Supplementary material
Source: Research Square preprint supplement (doi:10.21203/rs.3.rs-9128688/v1)
Supplement: Supplementary file 1 [file 62cc961a3d5e6e4f2d294a02.xlsx]

## Sheet: Sheet1
Data	Response variable	Mouse/Brains	Groups	n define as	slice/animal used	Normality Test (Shapiro-Wilk)	Homogeneity of variance test (Levene’s test)	Hypothesis test	Test value	P value	summary
Figure 1C	Grooming duration	Shank3B KO mouse	WT n=25	mouse	25 mice	W=0.945 df=25 p=0.194	F=3.006 df1=1 df2=59 p=0.088	Two-tailed unpaired t-test	t=-4.298 df=59	p < 0.001	***
			KO n=36		36 mice	W=0.973 df=36 p=0.504
	Number of grooming bouts		WT n=25		25 mice	W=0.896 df=25 p=0.015	F=0.124 df1=1 df2=59 p=0.726	Mann-Whitney U test	Z=-2.537	p=0.011	*
			KO n=36		36 mice	W=0.961 df=36 p=0.233
	Mean grooming durtion		WT n=25		25 mice	W=0.966 df=25 p=0.547	F=6.467 df1=1 df2=59 p=0.014	Mann-Whitney U test	Z=-2.434	p=0.015	*
			KO n=36		36 mice	W=0.898 df=36 p=0.003
Figure 1E	Percentage of total grooming duration		Stage 1 WT n=25		25 mice	W=0.974 df=25 p=0.750	F=0.019 df1=1 df2=59 p=0.891	Mann-Whitney U test	Z=-2.918	p=0.004	**
			Stage 1 KO n=36		36 mice	W=0.896 df=36 p=0.003
			Stage 2 WT n=25		25 mice	W=0.824 df=25 p<0.001	F=2.916 df1=1 df2=59 p=0.093	Mann-Whitney U test	Z=-0.528	p=0.598	ns
			Stage 2 KO n=36		36 mice	W=0.829 df=36 p<0.001
			Stage 3 WT n=25		25 mice	W=0.969 df=25 p=0.632	F=0.090 df1=1 df2=59 p=0.766	Two-tailed unpaired t-test	t=-2.309 df=59	p=0.024	*
			Stage 3 KO n=36		36 mice	W=0.990 df=36 p=0.978
			Stage 4 WT n=25		25 mice	W=0.866 df=25 p=0.004	F=14.342 df1=1 df2=59 p<0.001	Mann-Whitney U test	Z=-2.127	p=0.033	*
			Stage 4 KO n=36		36 mice	W=0.894 df=36 p=0.002
			Stage 5 WT n=25		25 mice	W=0.558 df=25 p<0.001	F=5.943 df1=1 df2=59 p=0.018	Mann-Whitney U test	Z=-1.018	p=0.309	ns
			Stage 5 KO n=36		36 mice	W=0.445 df=36 p<0.001
Figure 1F	Total transitions	Shank3B KO mouse	WT n=25	mouse	25 mice	W=0.857 df=25 p=0.002	F=0.259 df1=1 df2=59 p=0.613	Mann-Whitney U test	Z=-2.464	p=0.014	*
			KO n=36		36 mice	W=0.968 df=36 p=0.364
Figure 1H	Grooming duration	Restraint mouse	Control n=28	mouse	28 mice	W=0.927 df=28 p=0.051	F=0.029 df1=1 df2=63 p=0.965	Two-tailed unpaired t-test	t=-5.734 df=63	p < 0.001	***
			Restraint n=37		37 mice	W=0.969 df=37 p=0.379
	Number of grooming bouts		Control n=28		28 mice	W=0.936 df=28 p=0.086	F=5.922 df1=1 df2=63 p=0.018	Two-tailed unpaired separate variance estimation t-test	t=-4.497 df=62.957	p < 0.001	***
			Restraint n=37		37 mice	W=0.958 df=37 p=0.173
	Mean grooming durtion		Control n=28		28 mice	W=0.938 df=28 p=0.098	F=1.094 df1=1 df2=63 p=0.299	Mann-Whitney U test	Z=-2.093	p=0.036	*
			Restraint n=37		37 mice	W=0.862 df=37 p<0.001
Figure 1J	Percentage of total grooming duration		Stage 1 Control n=28		28 mice	W=0.900 df=28 p=0.011	F=0.106 df1=1 df2=63 p=0.746	Mann-Whitney U test	Z=-0.941	p=0.347	ns
			Stage 1 Restraint n=37		37 mice	W=0.765 df=37 p<0.001
			Stage 2 Control n=28		28 mice	W=0.936 df=28 p=0.089	F=14.953 df1=1 df2=63 p<0.001	Mann-Whitney U test	Z=-2.994	p=0.003	**
			Stage 2 Restraint n=37		37 mice	W=0.919 df=37 p=0.010
			Stage 3 Control n=28		28 mice	W=0.981 df=28 p=0.864	F=0.042 df1=1 df2=63 p=0.838	Two-tailed unpaired t-test	t=-4.029 df=63	p < 0.001	***
			Stage 3 Restraint n=37		37 mice	W=0.959 df=37 p=0.185
			Stage 4 Control n=28		28 mice	W=0.878 df=28 p=0.004	F=1.018 df1=1 df2=63 p=0.317	Mann-Whitney U test	Z=-0.305	p=0.761	ns
			Stage 4 Restraint n=37		37 mice	W=0.849 df=37 p<0.001
			Stage 5 Control n=28		28 mice	W=0.699 df=28 p<0.001	F=32.059 df1=1 df2=63 p<0.001	Mann-Whitney U test	Z=-2.014	p=0.044	*
			Stage 5 Restraint n=37		37 mice	W=0.779 df=37 p<0.001
Figure 1K	Total transitions	Restraint mouse	Control n=28	mouse	28 mice	W=0.913 df=28 p=0.023	F=0.899 df1=1 df2=63 p=0.347	Mann-Whitney U test	Z=-3.246	p < 0.001	***
			Restraint n=37		37 mice	W=0.975 df=37 p=0.544
Figure 3C	Density of c-fos of MD	WT mouse	MD Control n=9	mouse	9 mice	W=0.830 df=9 p=0.045	F=17.130 df1=1 df2=13 p=0.001	Mann-Whitney U test	Z=-2.946	p=0.003	**
			MD ChR2 n=6		6 mice	W=0.918 df=6 p=0.492
Figure 3D	Grooming duration (laser on) 20Hz of MD	WT mouse	MD Control n=9	mouse	9 mice	W=0.849 df=9 p=0.073	F=0.007 df1=1 df2=18 p=0.934	Two-tailed unpaired t-test	t=-3.677 df=18	p=0.002	**
			MD ChR2 n=11		11 mice	W=0.938 df=11 p=0.502
Figure 3F	Percentage of total grooming duration of MD	WT mouse	Stage 1 MD Control n=9	mouse	9 mice	W=0.907 df=9 p=0.297	F=19.575 df1=1 df2=18 p<0.001	Two-tailed unpaired separate variance estimation t-test	t=2.437 df=9.112	p=0.025	*
			Stage 1 MD ChR2 n=11		11 mice	W=0.859 df=11 p=0.056
			Stage 2 MD Control n=9		9 mice	W=0.840 df=9 p=0.057	F=0.657 df1=1 df2=18 p=0.428	Mann-Whitney U test	Z=-0.494	p=0.621	ns
			Stage 2 MD ChR2 n=11		11 mice	W=0.771 df=11 p=0.004
			Stage 3 MD Control n=9		9 mice	W=0.938 df=9 p=0.563	F=1.030 df1=1 df2=18 p=0.324	Two-tailed unpaired t-test	t=-1.043 df=18	p=0.311	ns
			Stage 3 MD ChR2 n=11		11 mice	W=0.886 df=11 p=0.125
			Stage 4 MD Control n=9		9 mice	W=0.825 df=9 p=0.039	F=9.305 df1=1 df2=18 p=0.007	Mann-Whitney U test	Z=-2.013	p=0.044	*
			Stage 4 MD ChR2 n=11		11 mice	W=0.857 df=11 p=0.052
			Stage 5 MD Control n=9		9 mice	W=0.883 df=9 p=0.170	F=11.875 df1=1 df2=18 p=0.003	Mann-Whitney U test	Z=-1.330	p=0.184	ns
			Stage 5 MD ChR2 n=11		11 mice	W=0.839 df=11 p=0.031
Figure 3G	Total transitions of MD	WT mouse	MD Control n=9	mouse	9 mice	W=0.942 df=9 p=0.599	F=1.666 df1=1 df2=18 p=0.213	Two-tailed unpaired t-test	t=-2.729 df=18	p=0.014	*
			MD ChR2 n=11		11 mice	W=0.962 df=11 p=0.791
Figure 3J	Density of c-fos of BLA	WT mouse	BLA Control n=9	mouse	9 mice	W=0.963 df=9 p=0.830	F=67.652 df1=1 df2=13 p<0.001	Two-tailed unpaired separate variance estimation t-test	t=-4.113 df=5.074	p=0.009	**
			BLA ChR2 n=6		6 mice	W=0.869 df=6 p=0.223
Figure 3K	Grooming duration (laser on) 20Hz of BLA	WT mouse	BLA Control n=9	mouse	9 mice	W=0.889 df=9 p=0.194	F=9.908 df1=1 df2=15 p=0.008	Two-tailed unpaired separate variance estimation t-test	t=3.616 df=8.530	p=0.006	**
			BLA ChR2 n=8		8 mice	W=0.878 df=8 p=0.181
Figure 3M	Percentage of total grooming duration of BLA	WT mouse	Stage 1 BLA Control n=9	mouse	9 mice	W=0.941 df=9 p=0.588	F=0.037 df1=1 df2=15 p=0.849	Two-tailed unpaired t-test	t=-3.280 df=15	p=0.005	**
			Stage 1 BLA ChR2 n=8		8 mice	W=0.925 df=8 p=0.475
			Stage 2 BLA Control n=9		9 mice	W=0.790 df=9 p=0.015	F=0.902 df1=1 df2=15 p=0.357	Mann-Whitney U test	Z=-0.770	p=0.441	ns
			Stage 2 BLA ChR2 n=8		8 mice	W=0.977 df=8 p=0.947
			Stage 3 BLA Control n=9		9 mice	W=0.983 df=9 p=0.979	F=0.754 df1=1 df2=15 p=0.399	Two-tailed unpaired t-test	t=1.516 df=15	p=0.150	ns
			Stage 3 BLA ChR2 n=8		8 mice	W=0.832 df=8 p=0.062
			Stage 4 BLA Control n=9		9 mice	W=0.911 df=9 p=0.322	F=5.807 df1=1 df2=15 p=0.029	Two-tailed unpaired separate variance estimation t-test	t=2.126 df=11.458	p=0.046	*
			Stage 4 BLA ChR2 n=8		8 mice	W=0.831 df=8 p=0.061
			Stage 5 BLA Control n=9		9 mice	W=0.494 df=9 p<0.001	F=0.545 df1=1 df2=15 p=0.472	Mann-Whitney U test	Z=-0.096	p=0.923	ns
			Stage 5 BLA ChR2 n=8		8 mice	W=0.577 df=8 p<0.001
Figure 3N	Total transitions of BLA	WT mouse	BLA Control n=9	mouse	9 mice	W=0.684 df=9 p<0.001	F=9.664 df1=1 df2=15 p=0.007	Mann-Whitney U test	Z=-3.464	p < 0.001	***
			BLA ChR2 n=8		8 mice	W=0.916 df=8 p=0.396
Figure 4C	Density of Arc of MD-DLS	WT mouse	MD-DLS Control n=7	mouse	7 mice	W=0.883 df=7 p=0.241	F=0.829 df1=1 df2=14 p=0.378	Two-tailed unpaired t-test	t=-6.571 df=14	p <0.0001	****
			MD-DLS ChR2 n=9		9 mice	W=0.943 df=9 p=0.619
Figure 4D	Grooming duration (laser on) 20Hz of MD-DLS	WT mouse	MD-DLS Control n=7	mouse	7 mice	W=0.735 df=7 p=0.009	F=1.422 df1=1 df2=15 p=0.252	Mann-Whitney U test	Z=-2.394	p=0.017	*
			MD-DLS ChR2 n=10		10 mice	W=0.864 df=10 p=0.084
Figure 4F	Percentage of total grooming duration of MD-DLS	WT mouse	Stage 1 MD-DLS Control n=7	mouse	7 mice	W=0.824 df=7 p=0.071	F=8.218 df1=1 df2=15 p=0.012	Mann-Whitney U test	Z=-2.440	p=0.015	*
			Stage 1 MD-DLS ChR2 n=10		10 mice	W=0.822 df=10 p=0.026
			Stage 2 MD-DLS Control n=7		7 mice	W=0.857 df=7 p=0.143	F=0.164 df1=1 df2=15 p=0.692	Two-tailed unpaired t-test	t=-0.926 df=15	p=0.369	ns
			Stage 2 MD-DLS ChR2 n=10		10 mice	W=0.896 df=10 p=0.198
			Stage 3 MD-DLS Control n=7		7 mice	W=0.885 df=7 p=0.251	F=0.581 df1=1 df2=15 p=0.458	Two-tailed unpaired t-test	t=-2.877 df=15	p=0.012	*
			Stage 3 MD-DLS ChR2 n=10		10 mice	W=0.971 df=10 p=0.897
			Stage 4 MD-DLS Control n=7		7 mice	W=0.854 df=7 p=0.133	F=3.914 df1=1 df2=15 p=0.067	Two-tailed unpaired t-test	t=-2.291 df=15	p=0.037	*
			Stage 4 MD-DLS ChR2 n=10		10 mice	W=0.948 df=10 p=0.643
			Stage 5 MD-DLS Control n=7		7 mice	W=0.954 df=7 p=0.766	F=4.166 df1=1 df2=15 p=0.059	Mann-Whitney U test	Z=-2.147	p=0.032	*
			Stage 5 MD-DLS ChR2 n=10		10 mice	W=0.723 df=10 p=0.002
Figure 4G	Total transitions of MD-DLS	WT mouse	MD-DLS Control n=7	mouse	7 mice	W=0.827 df=7 p=0.075	F=4.733 df1=1 df2=15 p=0.046	Two-tailed unpaired separate variance estimation t-test	t=-3.256 df=12.853	p=0.006	**
			MD-DLS ChR2 n=10		10 mice	W=0.974 df=10 p=0.924
Figure 4J	Density of Arc of BLA-DLS	WT mouse	BLA-DLS Control n=6	mouse	6 mice	W=0.955 df=6 p=0.778	F=7.879 df1=1 df2=12 p=0.016	Two-tailed unpaired separate variance estimation t-test	t=2.944 df=6.495	p=0.024	*
			BLA-DLS ChR2 n=8		8 mice	W=0.902 df=8 p=0.298
Figure 4K	Grooming duration (laser on) 20Hz of BLA-DLS	WT mouse	BLA-DLS Control n=9	mouse	9 mice	W=0.937 df=9 p=0.551	F=1.294 df1=1 df2=16 p=0.272	Two-tailed unpaired t-test	t=2.658 df=16	p=0.017	*
			BLA-DLS ChR2 n=9		9 mice	W=0.849 df=9 p=0.073
Figure 4M	Percentage of total grooming duration of BLA-DLS	WT mouse	Stage 1 BLA-DLS Control n=9	mouse	9 mice	W=0.891 df=9 p=0.204	F=1.486 df1=1 df2=15 p=0.242	Two-tailed unpaired t-test	t=-2.254 df=15	p=0.040	*
			Stage 1 BLA-DLS ChR2 n=8		8 mice	W=0.892 df=8 p=0.246
			Stage 2 BLA-DLS Control n=9		9 mice	W=0.782 df=9 p=0.013	F=0.407 df1=1 df2=15 p=0.533	Mann-Whitney U test	Z=-0.289	p=0.773	ns
			Stage 2 BLA-DLS ChR2 n=8		8 mice	W=0.866 df=8 p=0.139
			Stage 3 BLA-DLS Control n=9		9 mice	W=0.984 df=9 p=0.980	F=0.591 df1=1 df2=15 p=0.454	Two-tailed unpaired t-test	t=-1.126 df=15	p=0.278	ns
			Stage 3 BLA-DLS ChR2 n=8		8 mice	W=0.936 df=8 p=0.576
			Stage 4 BLA-DLS Control n=9		9 mice	W=0.951 df=9 p=0.696	F=0.570 df1=1 df2=15 p=0.462	Two-tailed unpaired t-test	t=2.358 df=15	p=0.032	*
			Stage 4 BLA-DLS ChR2 n=8		8 mice	W=0.863 df=8 p=0.130
			Stage 5 BLA-DLS Control n=9		9 mice	W=0.601 df=9 p<0.001	F=0.006 df1=1 df2=15 p=0.937	Mann-Whitney U test	Z=-0.787	p=0.431	ns
			Stage 5 BLA-DLS ChR2 n=8		8 mice	W=0.434 df=8 p<0.001
Figure 4N	Total transitions of BLA-DLS	WT mouse	BLA-DLS Control n=9	mouse	9 mice	W=0.961 df=9 p=0.811	F=5.534 df1=1 df2=15 p=0.033	Two-tailed unpaired separate variance estimation t-test	t=4.480 df=10.439	p<0.001	***
			BLA-DLS ChR2 n=8		8 mice	W=0.914 df=8 p=0.381
Figure 5C	Area under curve (0-5 s)	WT Vglut2-Cre mouse	MD-DLS Baseline n=4	mouse	4 mice	W=0.988 df=4 p=0.945	F=5.495 df1=1 df2=6 p=0.058	Two-tailed paired t-test	t=-3.456 df=3	p=0.041	*
			MD-DLS Light n=4		4 mice	W=0.961 df=4 p=0.788
Figure 5D	Amplitude	WT mouse	MD-DLS Baseline n=9	mouse	9 mice	W=0.933 df=9 p=0.512	F=22.017 df1=1 df2=16 p<0.001	Wilcoxon signed-rank test	Z=-2.666	p=0.008	**
			MD-DLS NBQX n=9		9 mice	W=0.938 df=9 p=0.561
Figure 5G	Area under curve (0-5 s)	WT Vglut2-Cre mouse	BLA-DLS Baseline n=5	mouse	5 mice	W=0.903 df=5 p=0.425	F=4.639 df1=1 df2=8 p=0.063	Two-tailed paired t-test	t=-2.850 df=4	p=0.046	*
			BLA-DLS Light n=5		5 mice	W=0.887 df=5 p=0.342
Figure 5H	Area under curve (0-5 s)	WT VGAT-Cre mouse	BLA-DLS Baseline n=6	mouse	6 mice	W=0.831 df=6 p=0.109	F=12.766 df1=1 df2=10 p=0.005	Wilcoxon signed-rank test	Z=-1.992	p=0.046	*
			BLA-DLS Light n=6		6 mice	W=0.951 df=6 p=0.748
Figure 5I	Amplitude	WT mouse	BLA-DLS Baseline n=7	mouse	7 mice	W=0.901 df=7 p=0.335	F=36.709 df1=1 df2=12 p<0.001	Wilcoxon signed-rank test	Z=-2.366	p=0.018	*
			BLA-DLS NBQX n=7		7 mice	W=0.982 df=7 p=0.967
Figure 5J	Amplitude	WT mouse	BLA-DLS Baseline n=5	mouse	5 mice	W=0.809 df=5 p=0.097	F=7.034 df1=1 df2=8 p=0.029	Wilcoxon signed-rank test	Z=-2.023	p=0.043	*
			BLA-DLS Bicuculine n=5		5 mice	W=0.762 df=5 p=0.039
Figure 5L	Grooming duration (laser on) 20Hz of BLA-DLS	WT VGAT-Cre mouse	BLA-DLS Control n=8	mouse	8 mice	W=0.956 df=8 p=0.774	F=1.082 df1=1 df2=16 p=0.314	Two-tailed unpaired t-test	t=2.169 df=16	p=0.046	*
			BLA-DLS ChR2 n=10		10 mice	W=0.921 df=10 p=0.365
Figure 5M	Percentage of total grooming duration of BLA-DLS	WT VGAT-Cre mouse	Stage 1 BLA-DLS Control n=8	mouse	8 mice	W=0.858 df=8 p=0.114	F=0.631 df1=1 df2=16 p=0.438	Two-tailed unpaired t-test	t=-2.132 df=16	p=0.049	*
			Stage 1 BLA-DLS ChR2 n=10		10 mice	W=0.883 df=10 p=0.142
			Stage 2 BLA-DLS Control n=8		8 mice	W=0.668 df=8 p<0.001	F=0.843 df1=1 df2=16 p=0.372	Mann-Whitney U test	Z=-0.355	p=0.722	ns
			Stage 2 BLA-DLS ChR2 n=10		10 mice	W=0.935 df=10 p=0.503
			Stage 3 BLA-DLS Control n=8		8 mice	W=0.945 df=8 p=0.659	F=0.004 df1=1 df2=16 p=0.951	Two-tailed unpaired t-test	t=0.515 df=16	p=0.613	ns
			Stage 3 BLA-DLS ChR2 n=10		10 mice	W=0.953 df=10 p=0.707
			Stage 4 BLA-DLS Control n=8		8 mice	W=0.889 df=8 p=0.231	F=16.578 df1=1 df2=16 p<0.001	Two-tailed unpaired separate variance estimation t-test	t=2.274 df=8.631	p=0.049	*
			Stage 4 BLA-DLS ChR2 n=10		10 mice	W=0.899 df=10 p=0.216
			Stage 5 BLA-DLS Control n=8		8 mice	W=0.941 df=8 p=0.623	F=4.515 df1=1 df2=16 p=0.050	Mann-Whitney U test	Z=-0.444	p=0.657	ns
			Stage 5 BLA-DLS ChR2 n=10		10 mice	W=0.703 df=10 p<0.001
Figure 5N	Total transitions of BLA-DLS	WT VGAT-Cre mouse	BLA-DLS Control n=8	mouse	8 mice	W=0.937 df=8 p=0.580	F=1.166 df1=1 df2=16 p=0.296	Two-tailed unpaired t-test	t=3.078 df=16	p=0.007	**
			BLA-DLS ChR2 n=10		10 mice	W=0.920 df=10 p=0.355
Figure 6F	Total distance of MD-DLS	WT mouse	MD-DLS Control n=7	mouse	7 mice	W=0.852 df=7 p=0.129	F=16.308 df1=1 df2=14 p=0.001	Mann-Whitney U test	Z=-2.382	p=0.017	*
			MD-DLS ChR2 n=9		9 mice	W=0.832 df=9 p=0.047
Figure 6G	Time in center of MD-DLS	WT mouse	MD-DLS Control n=7	mouse	7 mice	W=0.854 df=7 p=0.135	F=0.337 df1=1 df2=14 p=0.571	Two-tailed unpaired t-test	t=-0.064 df=14	p=0.950	ns
			MD-DLS ChR2 n=9		9 mice	W=0.893 df=9 p=0.213
Figure 6H	Total distance of MD-DLS	WT mouse	MD-DLS Control n=7	mouse	7 mice	W=0.970 df=7 p=0.898	F=0.095 df1=1 df2=14 p=0.763	Two-tailed unpaired t-test	t=-0.068 df=14	p=0.947	ns
			MD-DLS ChR2 n=9		9 mice	W=0.911 df=9 p=0.323
	Time in open arms of MD-DLS	WT mouse	MD-DLS Control n=7	mouse	7 mice	W=0.837 df=7 p=0.094	F=4.187 df1=1 df2=14 p=0.060	Two-tailed unpaired t-test	t=-0.939 df=14	p=0.364	ns
			MD-DLS ChR2 n=9		9 mice	W=0.860 df=9 p=0.095
Figure 6I	Total distance of BLA-DLS	WT VGAT-Cre mouse	BLA-DLS Control n=8	mouse	8 mice	W=0.800 df=8 p=0.028	F=2.649 df1=1 df2=16 p=0.123	Mann-Whitney U test	Z=-1.244	p=0.214	ns
			BLA-DLS ChR2 n=10		10 mice	W=0.898 df=10 p=0.208
Figure 6J	Time in center of BLA-DLS	WT VGAT-Cre mouse	BLA-DLS Control n=8	mouse	8 mice	W=0.783 df=8 p=0.019	F=0.343 df1=1 df2=16 p=0.566	Wilcoxon signed-rank test	Z=-2.221	p=0.026	*
			BLA-DLS ChR2 n=10		10 mice	W=0.928 df=10 p=0.425
Figure 6K	Total distance of BLA-DLS	WT VGAT-Cre mouse	BLA-DLS Control n=8	mouse	8 mice	W=0.931 df=8 p=0.528	F=0.467 df1=1 df2=16 p=0.504	Two-tailed unpaired t-test	t=-1.236 df=16	p=0.234	ns
			BLA-DLS ChR2 n=10		10 mice	W=0.967 df=10 p=0.861
	Time in open arms of BLA-DLS	WT VGAT-Cre mouse	BLA-DLS Control n=8	mouse	8 mice	W=0.792 df=8 p=0.024	F=0.178 df1=1 df2=16 p=0.679	Mann-Whitney U test	Z=-2.178	p=0.029	*
			BLA-DLS ChR2 n=10		10 mice	W=0.787 df=10 p=0.010
Figure 7A	Area under curve (0-5 s) of MD Total	Restraint mouse	MD Control n=4	mouse	4 mice	W=0.806 df=4 p=0.114	F=0.923 df1=1 df2=6 p=0.374	Two-tailed unpaired t-test	t=-0.746 df=6	p=0.484	ns
			MD Restraint n=4		4 mice	W=0.904 df=4 p=0.450
Figure 7B	Area under curve (0-5 s) of BLA Total	Restraint mouse	BLA Control n=4	mouse	4 mice	W=0.888 df=4 p=0.374	F=0.071 df1=1 df2=6 p=0.799	Mann-Whitney U test	Z=-2.309	p=0.021	*
			BLA Restraint n=4		4 mice	W=0.760 df=4 p=0.048
Figure 7C	Area under curve (0-5 s) of MD Stage 1	Restraint mouse	MD Control n=4	mouse	4 mice	W=0.984 df=4 p=0.927	F=3.465 df1=1 df2=6 p=0.112	Two-tailed unpaired t-test	t=-0.743 df=6	p=0.485	ns
			MD Restraint n=4		4 mice	W=0.949 df=4 p=0.712
	Area under curve (0-5 s) of MD Stage 2		MD Control n=4	mouse	4 mice	W=0.954 df=4 p=0.744	F=0.169 df1=1 df2=6 p=0.695	Two-tailed unpaired t-test	t=-2.456 df=6	p=0.049	*
			MD Restraint n=4		4 mice	W=0.882 df=4 p=0.348
	Area under curve (0-5 s) of MD Stage 3		MD Control n=4	mouse	4 mice	W=0.954 df=4 p=0.741	F=1.581 df1=1 df2=6 p=0.255	Two-tailed unpaired t-test	t=-0.360 df=6	p=0.731	ns
			MD Restraint n=4		4 mice	W=0.860 df=4 p=0.262
	Area under curve (0-5 s) of MD Stage 4		MD Control n=4	mouse	4 mice	W=0.941 df=4 p=0.660	F=4.161 df1=1 df2=6 p=0.087	Two-tailed unpaired t-test	t=0.054 df=6	p=0.959	ns
			MD Restraint n=4		4 mice	W=0.967 df=4 p=0.826
	Area under curve (0-5 s) of MD Stage 5		MD Control n=3	mouse	3 mice	W=0.969 df=3 p=0.664	no	Two-tailed unpaired t-test	t=1.677 df=5	p=0.154	ns
			MD Restraint n=4		4 mice	W=0.897 df=4 p=0.416
Figure 7D	Area under curve (0-5 s) of BLA Stage 1	Restraint mouse	BLA Control n=4	mouse	4 mice	W=0.915 df=4 p=0.509	F=4.060 df1=1 df2=6 p=0.091	Two-tailed unpaired t-test	t=2.551 df=6	p=0.043	*
			BLA Restraint n=4		4 mice	W=0.863 df=4 p=0.273
	Area under curve (0-5 s) of BLA Stage 2		BLA Control n=4	mouse	4 mice	W=0.991 df=4 p=0.963	F=1.239 df1=1 df2=6 p=0.308	Two-tailed unpaired t-test	t=2.580 df=6	p=0.042	*
			BLA Restraint n=4		4 mice	W=0.829 df=4 p=0.166
	Area under curve (0-5 s) of BLA Stage 3		BLA Control n=4	mouse	4 mice	W=0.977 df=4 p=0.887	F=2.753 df1=1 df2=6 p=0.148	Two-tailed unpaired t-test	t=-2.495 df=6	p=0.047	*
			BLA Restraint n=4		4 mice	W=0.834 df=4 p=0.178
	Area under curve (0-5 s) of BLA Stage 4		BLA Control n=4	mouse	4 mice	W=0.908 df=4 p=0.473	F=0.069 df1=1 df2=6 p=0.801	Two-tailed unpaired t-test	t=-2.548 df=6	p=0.044	*
			BLA Restraint n=4		4 mice	W=0.901 df=4 p=0.436
	Area under curve (0-5 s) of BLA Stage 5		BLA Control n=4	mouse	4 mice	W=0.864 df=4 p=0.273	F=2.805 df1=1 df2=6 p=0.145	Two-tailed unpaired t-test	t=2.569 df=6	p=0.042	*
			BLA Restraint n=4		4 mice	W=0.978 df=4 p=0.890
Figure 7G	Grooming duration (laser on) 20Hz of BLA-DLS	WT FoscreER mouse	BLA-DLS Control n=6	mouse	6 mice	W=0.921 df=6 p=0.513	F=1.839 df1=1 df2=10 p=0.205	Two-tailed unpaired t-test	t=2.585 df=10	p=0.027	*
			BLA-DLS ChR2 n=6		6 mice	W=0.882 df=6 p=0.278
Figure 7I	Percentage of total grooming duration of BLA-DLS	WT FoscreER mouse	Stage 1 BLA-DLS Control n=6	mouse	6 mice	W=0.961 df=6 p=0.824	F=0.018 df1=1 df2=10 p=0.895	Mann-Whitney U test	Z=-2.406	p=0.016	*
			Stage 1 BLA-DLS ChR2 n=6		6 mice	W=0.751 df=6 p=0.020
			Stage 2 BLA-DLS Control n=6		6 mice	W=0.992 df=6 p=0.994	F=13.0628 df1=1 df2=10 p=0.005	Mann-Whitney U test	Z=-2.402	p=0.016	*
			Stage 2 BLA-DLS ChR2 n=6		6 mice	W=0.744 df=6 p=0.017
			Stage 3 BLA-DLS Control n=6		6 mice	W=0.829 df=6 p=0.106	F=2.989 df1=1 df2=10 p=0.115	Two-tailed unpaired t-test	t=-3.146 df=10	p=0.010	*
			Stage 3 BLA-DLS ChR2 n=6		6 mice	W=0.947 df=6 p=0.715
			Stage 4 BLA-DLS Control n=6		6 mice	W=0.841 df=6 p=0.133	F=18.054 df1=1 df2=10 p=0.002	Mann-Whitney U test	Z=-0.641	p=0.522	ns
			Stage 4 BLA-DLS ChR2 n=6		6 mice	W=0.869 df=6 p=0.222
			Stage 5 BLA-DLS Control n=6		6 mice	W=0.936 df=6 p=0.625	F=6.809 df1=1 df2=10 p=0.026	Mann-Whitney U test	Z=-2.096	p=0.036	*
			Stage 5 BLA-DLS ChR2 n=6		6 mice	W=0.747 df=6 p=0.019
Figure 7J	Total transitions of BLA-DLS	WT FoscreER mouse	BLA-DLS Control n=6	mouse	6 mice	W=0.849 df=6 p=0.156	F=5.862 df1=1 df2=10 p=0.036	Two-tailed unpaired separate variance estimation t-test	t=0.255 df=6.538	p=0.806	ns
			BLA-DLS ChR2 n=6		6 mice	W=0.878 df=6 p=0.262
Figure 8A	Area under curve (0-5 s) of MD Total	Shank3B KO mouse	MD Control n=4	mouse	4 mice	W=0.979 df=4 p=0.894	F=0.040 df1=1 df2=6 p=0.848	Two-tailed unpaired t-test	t=-5.302 df=6	p=0.002	**
			MD Restraint n=4		4 mice	W=0.979 df=4 p=0.896
Figure 8B	Area under curve (0-5 s) of BLA Total	Shank3B KO mouse	BLA Control n=4	mouse	4 mice	W=0.910 df=4 p=0.482	F=5.517 df1=1 df2=7 p=0.051	Two-tailed unpaired t-test	t=2.584 df=7	p=0.037	*
			BLA Restraint n=5		5 mice	W=0.804 df=5 p=0.087
Figure 8C	Area under curve (0-5 s) of MD Stage 1	Shank3B KO mouse	MD Control n=4	mouse	4 mice	W=0.848 df=4 p=0.219	F=18.111 df1=1 df2=6 p=0.005	Two-tailed unpaired separate variance estimation t-test	t=-2.872 df=3.624	p=0.049	*
			MD Restraint n=4		4 mice	W=0.768 df=4 p=0.056
	Area under curve (0-5 s) of MD Stage 2		MD Control n=4	mouse	4 mice	W=0.908 df=4 p=0.469	F=23.408 df1=1 df2=6 p=0.003	Two-tailed unpaired separate variance estimation t-test	t=-0.441 df=3.342	p=0.686	ns
			MD Restraint n=4		4 mice	W=0.904 df=4 p=0.451
	Area under curve (0-5 s) of MD Stage 3		MD Control n=4	mouse	4 mice	W=0.827 df=4 p=0.159	F=3.952 df1=1 df2=6 p=0.094	Mann-Whitney U test	Z=-2.309	p=0.021	*
			MD Restraint n=4		4 mice	W=0.739 df=4 p=0.030
	Area under curve (0-5 s) of MD Stage 4		MD Control n=4	mouse	4 mice	W=0.867 df=4 p=0.286	F=1.358 df1=1 df2=6 p=0.288	Two-tailed unpaired t-test	t=-2.655 df=6	p=0.038	*
			MD Restraint n=4		4 mice	W=0.931 df=4 p=0.599
	Area under curve (0-5 s) of MD Stage 5		MD Control n=4	mouse	4 mice	W=0.924 df=4 p=0.560	F=1.327 df1=1 df2=6 p=0.293	Two-tailed unpaired t-test	t=-0.399 df=6	p=0.704	ns
			MD Restraint n=4		4 mice	W=0.901 df=4 p=0.436
Figure 8D	Area under curve (0-5 s) of BLA Stage 1	Shank3B KO mouse	BLA Control n=4	mouse	4 mice	W=0.796 df=4 p=0.095	F=0.139 df1=1 df2=7 p=0.721	Two-tailed unpaired t-test	t=-2.789 df=7	p=0.027	*
			BLA Restraint n=5		5 mice	W=0.788 df=5 p=0.064
	Area under curve (0-5 s) of BLA Stage 2		BLA Control n=4	mouse	4 mice	W=0.776 df=4 p=0.066	F=0.016 df1=1 df2=7 p=0.904	Two-tailed unpaired t-test	t=-2.726 df=7	p=0.030	*
			BLA Restraint n=5		5 mice	W=0.901 df=5 p=0.413
	Area under curve (0-5 s) of BLA Stage 3		BLA Control n=4	mouse	4 mice	W=0.774 df=4 p=0.063	F=3.780 df1=1 df2=7 p=0.093	Two-tailed unpaired t-test	t=2.731 df=7	p=0.029	*
			BLA Restraint n=5		5 mice	W=0.948 df=5 p=0.724
	Area under curve (0-5 s) of BLA Stage 4		BLA Control n=4	mouse	4 mice	W=0.887 df=4 p=0.368	F=1.692 df1=1 df2=7 p=0.234	Two-tailed unpaired t-test	t=2.367 df=7	p=0.049	*
			BLA Restraint n=5		5 mice	W=0.871 df=5 p=0.271
	Area under curve (0-5 s) of BLA Stage 5		BLA Control n=4	mouse	4 mice	W=0.960 df=4 p=0.777	F=0.168 df1=1 df2=7 p=0.694	Two-tailed unpaired t-test	t=-2.828 df=7	p=0.025	*
			BLA Restraint n=5		5 mice	W=0.962 df=5 p=0.823
Figure 8E	Grooming duration (laser on) 20Hz of MD-DLS	Shank3B KO mouse	MD-DLS Control n=8	mouse	8 mice	W=0.970 df=8 p=0.895	F=0.061 df1=1 df2=15 p=0.808	Two-tailed unpaired t-test	t=3.952 df=15	p=0.001	**
			MD-DLS NpHR n=9		9 mice	W=0.915 df=9 p=0.351
Figure 8F	Percentage of total grooming duration of MD-DLS	Shank3B KO mouse	Stage 1 MD-DLS Control n=8	mouse	8 mice	W=0.759 df=8 p=0.010	F=1.158 df1=1 df2=15 p=0.299	Mann-Whitney U test	Z=-2.213	p=0.027	*
			Stage 1 MD-DLS NpHR n=9		9 mice	W=0.855 df=9 p=0.084
			Stage 2 MD-DLS Control n=8		8 mice	W=0.842 df=8 p=0.080	F=0.481 df1=1 df2=15 p=0.499	Two-tailed unpaired t-test	t=0.881 df=15	p=0.392	ns
			Stage 2 MD-DLS NpHR n=9		9 mice	W=0.867 df=9 p=0.114
			Stage 3 MD-DLS Control n=8		8 mice	W=0.892 df=8 p=0.243	F=0.604 df1=1 df2=15 p=0.449	Two-tailed unpaired t-test	t=-0.639 df=15	p=0.533	ns
			Stage 3 MD-DLS NpHR n=9		9 mice	W=0.919 df=9 p=0.385
			Stage 4 MD-DLS Control n=8		8 mice	W=0.859 df=8 p=0.117	F=0.532 df1=1 df2=15 p=0.477	Two-tailed unpaired t-test	t=2.524 df=15	p=0.023	*
			Stage 4 MD-DLS NpHR n=9		9 mice	W=0.957 df=9 p=0.765
			Stage 5 MD-DLS Control n=8		8 mice	W=0.498 df=8 p<0.001	F=1.399 df1=1 df2=15 p=0.255	Mann-Whitney U test	Z=-0.481	p=0.630	ns
			Stage 5 MD-DLS NpHR n=9		9 mice	W=0.555 df=9 p<0.001
Figure 8G	Total transitions of MD-DLS	Shank3B KO mouse	MD-DLS Control n=8	mouse	8 mice	W=0.968 df=8 p=0.879	F=1.653 df1=1 df2=15 p=0.218	Two-tailed unpaired t-test	t=4.975 df=15	p<0.001	***
			MD-DLS NpHR n=9		9 mice	W=0.945 df=9 p=0.639
Figure 8H	Grooming duration (laser on) 20Hz of BLA-DLS	Shank3B KO mouse	BLA-DLS Control n=7	mouse	7 mice	W=0.912 df=7 p=0.407	F=1.200 df1=1 df2=15 p=0.291	Two-tailed unpaired t-test	t=3.897 df=15	p=0.001	**
			BLA-DLS ChR2 n=10		10 mice	W=0.875 df=10 p=0.113
Figure 8I	Percentage of total grooming duration of BLA-DLS	Shank3B KO mouse	Stage 1 BLA-DLS Control n=7	mouse	7 mice	W=0.977 df=7 p=0.943	F=0.312 df1=1 df2=15 p=0.584	Mann-Whitney U test	Z=-2.049	p=0.040	*
			Stage 1 BLA-DLS ChR2 n=10		10 mice	W=0.806 df=10 p=0.017
			Stage 2 BLA-DLS Control n=7		7 mice	W=0.916 df=7 p=0.436	F=0.057 df1=1 df2=15 p=0.814	Mann-Whitney U test	Z=-2.148	p=0.032	*
			Stage 2 BLA-DLS ChR2 n=10		10 mice	W=0.629 df=10 p<0.001
			Stage 3 BLA-DLS Control n=7		7 mice	W=0.910 df=7 p=0.399	F=0.210 df1=1 df2=15 p=0.653	Two-tailed unpaired t-test	t=0.493 df=15	p=0.629	ns
			Stage 3 BLA-DLS ChR2 n=10		10 mice	W=0.889 df=10 p=0.165
			Stage 4 BLA-DLS Control n=7		7 mice	W=0.801 df=7 p=0.041	F=0.012 df1=1 df2=15 p=0.916	Mann-Whitney U test	Z=-0.685	p=0.493	ns
			Stage 4 BLA-DLS ChR2 n=10		10 mice	W=0.786 df=10 p=0.010
			Stage 5 BLA-DLS Control n=7		7 mice	W=0.889 df=7 p=0.272	F=24.164 df1=1 df2=15 p<0.001	Mann-Whitney U test	Z=-2.524	p=0.012	*
			Stage 5 BLA-DLS ChR2 n=10		10 mice	W=0.454 df=10 p<0.001
Figure 8J	Total transitions of BLA-DLS	Shank3B KO mouse	BLA-DLS Control n=7	mouse	7 mice	W=0.839 df=7 p=0.291	F=12.955 df1=1 df2=15 p=0.003	Two-tailed unpaired separate variance estimation t-test	t=3.844 df=7.099	p=0.006	**
			BLA-DLS ChR2 n=10		10 mice	W=0.930 df=10 p=0.453
Supplementary Figure 1F	Grooming duration	Shank3B KO mouse	Stage 1 WT n=25	mouse	25 mice	W=0.850 df=25 p=0.002	F=0.136 df1=1 df2=59 p=0.713	Mann-Whitney U test	Z=-0.132	p=0.895	ns
			Stage 1 KO n=36		36 mice	W=0.824 df=36 p<0.001
			Stage 2 WT n=25		25 mice	W=0.606 df=25 p<0.001	F=0.904 df1=1 df2=59 p=0.346	Mann-Whitney U test	Z=-2.589	p=0.010	*
			Stage 2 KO n=36		36 mice	W=0.708 df=36 p<0.001
			Stage 3 WT n=25		25 mice	W=0.887 df=25 p=0.010	F=15.180 df1=1 df2=59 p<0.001	Mann-Whitney U test	Z=-3.813	p < 0.001	***
			Stage 3 KO n=36		36 mice	W=0.960 df=36 p=0.209
			Stage 4 WT n=25		25 mice	W=0.602 df=25 p<0.001	F=13.948 df1=1 df2=59 p<0.001	Mann-Whitney U test	Z=-2.310	p=0.021	*
			Stage 4 KO n=36		36 mice	W=0.866 df=36 p<0.001
			Stage 5 WT n=25		25 mice	W=0.471 df=25 p<0.001	F=0.103 df1=1 df2=59 p=0.749	Mann-Whitney U test	Z=-1.003	p=0.316	ns
			Stage 5 KO n=36		36 mice	W=0.571 df=36 p<0.001
Supplementary Figure 1G	Grooming duration	Restraint mouse	Stage 1 Control n=28	mouse	28 mice	W=0.500 df=28 p<0.001	F=0.10 df1=1 df2=63 p=0.919	Mann-Whitney U test	Z=-2.432	p=0.015	*
			Stage 1 Restraint n=37		37 mice	W=0.799 df=37 p<0.001
			Stage 2 Control n=28		28 mice	W=0.858 df=28 p=0.001	F=1.916 df1=1 df2=63 p=0.171	Mann-Whitney U test	Z=-0.066	p=0.947	ns
			Stage 2 Restraint n=37		37 mice	W=0.938 df=37 p=0.040
			Stage 3 Control n=28		28 mice	W=0.926 df=28 p=0.049	F=3.145 df1=1 df2=63 p=0.081	Mann-Whitney U test	Z=-5.432	p < 0.001	***
			Stage 3 Restraint n=37		37 mice	W=0.983 df=37 p=0.833
			Stage 4 Control n=28		28 mice	W=0.755 df=28 p<0.001	F=2.592 df1=1 df2=63 p=0.112	Mann-Whitney U test	Z=-2.597	p=0.009	**
			Stage 4 Restraint n=37		37 mice	W=0.682 df=37 p<0.001
			Stage 5 Control n=28		28 mice	W=0.729 df=28 p<0.001	F=14.778 df1=1 df2=63 p<0.001	Mann-Whitney U test	Z=-0.073	p=0.942	ns
			Stage 5 Restraint n=37		37 mice	W=0.740 df=37 p<0.001
Supplementary Figure 2E	Density of c-fos of DLS	WT mouse	DLS Control n=5	mouse	5 mice	W=0.885 df=5 p=0.331	F=17.387 df1=1 df2=9 p=0.002	Two-tailed unpaired separate variance estimation t-test	t=-8.578 df=5.404	p<0.001	***
			DLS ChR2 n=6		6 mice	W=0.864 df=6 p=0.203
Supplementary Figure 2F	Grooming duration (laser on) 20Hz of DLS	WT mouse	DLS Control n=6	mouse	6 mice	W=0.958 df=6 p=0.804	F=0.045 df1=1 df2=12 p=0.836	Two-tailed unpaired t-test	t=0.541 df=12	p=0.598	ns
			DLS ChR2 n=8		8 mice	W=0.933 df=8 p=0.542
Supplementary Figure 2G	Grooming duration of DLS	WT mouse	Stage 1 DLS Control n=6	mouse	6 mice	W=0.865 df=6 p=0.206	F=0.735 df1=1 df2=10 p=0.411	Two-tailed unpaired t-test	t=2.729 df=10	p=0.021	*
			Stage 1 DLS ChR2 n=6		6 mice	W=0.961 df=6 p=0.830
			Stage 2 DLS Control n=6		6 mice	W=0.971 df=6 p=0.899	F=1.994 df1=1 df2=10 p=0.188	Two-tailed unpaired t-test	t=4.732 df=10	p=0.001	**
			Stage 2 DLS ChR2 n=6		6 mice	W=0.912 df=6 p=0.451
			Stage 3 DLS Control n=6		6 mice	W=0.757 df=6 p=0.024	F=1.256 df1=1 df2=10 p=0.289	Mann-Whitney U test	Z=-0.962	p=0.336	ns
			Stage 3 DLS ChR2 n=6		6 mice	W=0.878 df=6 p=0.258
			Stage 4 DLS Control n=6		6 mice	W=0.866 df=6 p=0.211	F=0.466 df1=1 df2=10 p=0.510	Two-tailed unpaired t-test	t=0.419 df=10	p=0.684	ns
			Stage 4 DLS ChR2 n=6		6 mice	W=0.821 df=6 p=0.090
			Stage 5 DLS Control n=6		6 mice	W=0.496 df=6 p<0.001	F=1.331 df1=1 df2=10 p=0.276	Mann-Whitney U test	Z=-1.048	p=0.295	ns
			Stage 5 DLS ChR2 n=6		6 mice	W=0.823 df=6 p=0.094
Supplementary Figure 2H	Percentage of total grooming duration of DLS		Stage 1 DLS Control n=6		6 mice	W=0.953 df=6 p=0.765	F=0.455 df1=1 df2=10 p=0.515	Mann-Whitney U test	Z=-0.320	p=0.749	ns
			Stage 1 DLS ChR2 n=6		6 mice	W=0.787 df=6 p=0.045
			Stage 2 DLS Control n=6		6 mice	W=0.848 df=6 p=0.152	F=4.461 df1=1 df2=10 p=0.061	Two-tailed unpaired t-test	t=2.530 df=10	p=0.030	*
			Stage 2 DLS ChR2 n=6		6 mice	W=0.899 df=6 p=0.367
			Stage 3 DLS Control n=6		6 mice	W=0.798 df=6 p=0.056	F=0.646 df1=1 df2=10 p=0.440	Two-tailed unpaired t-test	t=-1.765 df=10	p=0.108	ns
			Stage 3 DLS ChR2 n=6		6 mice	W=0.907 df=6 p=0.419
			Stage 4 DLS Control n=6		6 mice	W=0.870 df=6 p=0.226	F=2.789 df1=1 df2=10 p=0.126	Two-tailed unpaired t-test	t=-0.231 df=10	p=0.822	ns
			Stage 4 DLS ChR2 n=6		6 mice	W=0.912 df=6 p=0.447
			Stage 5 DLS Control n=6		6 mice	W=0.496 df=6 p<0.001	F=16.100 df1=1 df2=10 p=0.002	Mann-Whitney U test	Z=-1.429	p=0.153	ns
			Stage 5 DLS ChR2 n=6		6 mice	W=0.790 df=6 p=0.048
Supplementary Figure 2I	Total transitions	Restraint mouse	DLS Control n=6	mouse	6 mice	W=0.931 df=6 p=0.584	F=2.343 df1=1 df2=10 p=0.157	Two-tailed unpaired t-test	t=-1.076 df=10	p=0.307	ns
			DLS ChR2 n=6		6 mice	W=0.939 df=6 p=0.654
Supplementary Figure 5A	Grooming duration of MD	WT mouse	Stage 1 MD Control n=9	mouse	9 mice	W=0.848 df=9 p=0.070	F=1.321 df1=1 df2=18 p=0.265	Mann-Whitney U test	Z=-0.342	p=0.732	ns
			Stage 1 MD ChR2 n=11		11 mice	W=0.638 df=11 p<0.001
			Stage 2 MD Control n=9		9 mice	W=0.781 df=9 p=0.013	F=1.099 df1=1 df2=18 p=0.308	Mann-Whitney U test	Z=-2.013	p=0.044	*
			Stage 2 MD ChR2 n=11		11 mice	W=0.882 df=11 p=0.111
			Stage 3 MD Control n=9		9 mice	W=0.921 df=9 p=0.402	F=3.758 df1=1 df2=18 p=0.068	Two-tailed unpaired t-test	t=-4.202 df=18	p < 0.001	***
			Stage 3 MD ChR2 n=11		11 mice	W=0.962 df=11 p=0.801
			Stage 4 MD Control n=9		9 mice	W=0.759 df=9 p=0.007	F=11.345 df1=1 df2=18 p=0.003	Mann-Whitney U test	Z=-2.013	p=0.044	*
			Stage 4 MD ChR2 n=11		11 mice	W=0.824 df=11 p=0.019
			Stage 5 MD Control n=9		9 mice	W=0.787 df=9 p=0.015	F=0.011 df1=1 df2=18 p=0.917	Mann-Whitney U test	Z=-0.038	p=0.970	ns
			Stage 5 MD ChR2 n=11		11 mice	W=0.783 df=11 p=0.006
Supplementary Figure 5B	Grooming duration of BLA	WT mouse	Stage 1 BLA Control n=9	mouse	9 mice	W=0.893 df=9 p=0.213	F=3.340 df1=1 df2=15 p=0.088	Two-tailed unpaired t-test	t=0.867 df=15	p=0.400	ns
			Stage 1 BLA ChR2 n=8		8 mice	W=0.931 df=8 p=0.529
			Stage 2 BLA Control n=9		9 mice	W=0.738 df=9 p=0.004	F=2.029 df1=1 df2=15 p=0.175	Mann-Whitney U test	Z=-2.600	p=0.009	**
			Stage 2 BLA ChR2 n=8		8 mice	W=0.929 df=8 p=0.505
			Stage 3 BLA Control n=9		9 mice	W=0.757 df=9 p=0.007	F=5.223 df1=1 df2=15 p=0.037	Mann-Whitney U test	Z=-2.983	p=0.003	**
			Stage 3 BLA ChR2 n=8		8 mice	W=0.837 df=8 p=0.070
			Stage 4 BLA Control n=9		9 mice	W=0.835 df=9 p=0.051	F=17.447 df1=1 df2=15 p<0.001	Mann-Whitney U test	Z=-2.508	p=0.012	*
			Stage 4 BLA ChR2 n=8		8 mice	W=0.622 df=8 p<0.001
			Stage 5 BLA Control n=9		9 mice	W=0.517 df=9 p<0.001	F=5.278 df1=1 df2=15 p=0.036	Mann-Whitney U test	Z=-1.156	p=0.248	ns
			Stage 5 BLA ChR2 n=8		8 mice	W=0.637 df=8 p<0.001
Supplementary Figure 6B	Grooming terminated of MD	WT mouse	Control n=5	mouse	5 mice	W=0.886 df=5 p=0.335	F=2.475 df1=1 df2=9 p=0.150	Two-tailed unpaired t-test	t=0.450 df=9	p=0.663	ns
			ChR2 n=6		6 mice	W=0.936 df=6 p=0.625
Supplementary Figure 6C	Total grooming of MD		Control n=5		5 mice	W=0.897df=5 p=0.396	F=0.163 df1=1 df2=9 p=0.696	Two-tailed unpaired t-test	t=0.840 df=9	p=0.423	ns
			ChR2 n=6		6 mice	W=0.915 df=6 p=0.473
Supplementary Figure 6F	Grooming terminated of BLA	WT mouse	Control n=6	mouse	6 mice	W=0.924 df=6 p=0.536	F=0.203 df1=1 df2=10 p=0.662	Two-tailed unpaired t-test	t=-10.376 df=10	p < 0.0001	****
			ChR2 n=6		6 mice	W=0.763 df=6 p=0.027
Supplementary Figure 6G	Offset latency of BLA		Control n=6		6 mice	W=0.953 df=6 p=0.767	F=0.708 df1=1 df2=10 p=0.420	Mann-Whitney U test	Z=-2.402	p=0.016	*
			ChR2 n=6		6 mice	W=0.766 df=6 p=0.028
Supplementary Figure 6H	Grooming retrieval of BLA		Control n=6		6 mice	W=0.770 df=6 p=0.031	F=4.009 df1=1 df2=10 p=0.073	Mann-Whitney U test	Z=-2.342	p =0.019	*
			ChR2 n=6		6 mice	W=0.936 df=6 p=0.628
Supplementary Figure 6I	Retrieval grooming time of BLA		Control n=6		6 mice	W=0.784 df=6 p=0.042	F=6.087 df1=1 df2=10 p=0.033	Mann-Whitney U test	Z=-2.201	p =0.028	*
			ChR2 n=6		6 mice	W=0.947 df=6 p=0.715
Supplementary Figure 6J	Total grooming of BLA		Control n=6		6 mice	W=0.970 df=6 p=0.895	F=1.435 df1=1 df2=10 p=0.259	Two-tailed unpaired t-test	t=3.131 df=10	p =0.011	*
			ChR2 n=6		6 mice	W=0.918 df=6 p=0.494
Supplementary Figure 7B	Density of c-fos of M2	WT mouse	M2 Control n=9	mouse	9 mice	W=0.841 df=9 p=0.058	F=0.778 df1=1 df2=16 p=0.391	Mann-Whitney U test	Z=-3.576	p < 0.0001	****
			M2 ChR2 n=9		9 mice	W=0.712 df=9 p=0.002
Supplementary Figure 7C	Grooming duration (laser on) 20Hz of M2	WT mouse	M2 Control n=10	mouse	10 mice	W=0.879 df=10 p=0.126	F=0.024 df1=1 df2=17 p=0.879	Two-tailed unpaired t-test	t=-0.087 df=17	p =0.931	ns
			M2 ChR2 n=9		9 mice	W=0.926 df=9 p=0.443
Supplementary Figure 7D	Grooming duration of M2	WT mouse	Stage 1 M2 Control n=10	mouse	10 mice	W=0.956 df=10 p=0.737	F=0.045 df1=1 df2=17 p=0.835	Two-tailed unpaired t-test	t=-0.995 df=17	p =0.334	ns
			Stage 1 M2 ChR2 n=9		9 mice	W=0.886 df=9 p=0.183
			Stage 2 M2 Control n=10		10 mice	W=0.770 df=10 p=0.006	F=0.256 df1=1 df2=17 p=0.620	Mann-Whitney U test	Z=-0.653	p =0.514	ns
			Stage 2 M2 ChR2 n=9		9 mice	W=0.827 df=9 p=0.041
			Stage 3 M2 Control n=10		10 mice	W=0.924 df=10 p=0.395	F=2.056 df1=1 df2=17 p=0.170	Two-tailed unpaired t-test	t=0.883 df=17	p =0.390	ns
			Stage 3 M2 ChR2 n=9		9 mice	W=0.881 df=9 p=0.159
			Stage 4 M2 Control n=10		10 mice	W=0.576 df=10 p<0.001	F=1.827 df1=1 df2=17 p=0.194	Mann-Whitney U test	Z=-0.408	p =0.683	ns
			Stage 4 M2 ChR2 n=9		9 mice	W=0.706 df=9 p=0.002
			Stage 5 M2 Control n=10		10 mice	W=0.799 df=10 p=0.014	F=0.554 df1=1 df2=17 p=0.467	Mann-Whitney U test	Z=-0.735	p =0.462	ns
			Stage 5 M2 ChR2 n=9		9 mice	W=0.786 df=9 p=0.014
Supplementary Figure 7E	Percentage of total grooming duration of M2	WT mouse	Stage 1 M2 Control n=10	mouse	10 mice	W=0.931 df=10 p=0.462	F=0.005 df1=1 df2=17 p=0.947	Two-tailed unpaired t-test	t=-1.205 df=17	p =0.245	ns
			Stage 1 M2 ChR2 n=9		9 mice	W=0.917 df=9 p=0.370
			Stage 2 M2 Control n=10		10 mice	W=0.968 df=10 p=0.875	F=1.372 df1=1 df2=17 p=0.258	Two-tailed unpaired t-test	t=0.828 df=17	p =0.419	ns
			Stage 2 M2 ChR2 n=9		9 mice	W=0.915 df=9 p=0.354
			Stage 3 M2 Control n=10		10 mice	W=0.909 df=10 p=0.274	F=2.033 df1=1 df2=17 p=0.172	Two-tailed unpaired t-test	t=1.086 df=17	p =0.293	ns
			Stage 3 M2 ChR2 n=9		9 mice	W=0.876 df=9 p=0.143
			Stage 4 M2 Control n=10		10 mice	W=0.701 df=10 p<0.001	F=2.492 df1=1 df2=17 p=0.133	Mann-Whitney U test	Z=-0.490	p =0.624	ns
			Stage 4 M2 ChR2 n=9		9 mice	W=0.789 df=9 p=0.015
			Stage 5 M2 Control n=10		10 mice	W=0.902 df=10 p=0.233	F=4.421 df1=1 df2=17 p=0.051	Two-tailed unpaired t-test	t=1.752 df=17	p =0.098	ns
			Stage 5 M2 ChR2 n=9		9 mice	W=0.942 df=9 p=0.606
Supplementary Figure 7F	Total transitions of M2	WT mouse	M2 Control n=10	mouse	10 mice	W=0.881 df=10 p=0.135	F=0.875 df1=1 df2=17 p=0.363	Mann-Whitney U test	Z=-0.490	p =0.624	ns
			M2 ChR2 n=9		9 mice	W=0.806 df=9 p=0.024
Supplementary Figure 7H	Density of c-fos of S1	WT mouse	S1 Control n=9	mouse	9 mice	W=0.815 df=9 p=0.030	F=6.492 df1=1 df2=15 p=0.022	Mann-Whitney U test	Z=-3.464	p < 0.001	***
			S1 ChR2 n=8		8 mice	W=0.909 df=8 p=0.350
Supplementary Figure 7I	Grooming duration (laser on) 20Hz of S1	WT mouse	S1 Control n=9	mouse	9 mice	W=0.887 df=9 p=0.188	F=0.090 df1=1 df2=17 p=0.768	Two-tailed unpaired t-test	t=-0.591 df=17	p =0.563	ns
			S1 ChR2 n=10		10 mice	W=0.915 df=10 p=0.314
Supplementary Figure 7J	Grooming duration of S1	WT mouse	Stage 1 S1 Control n=8	mouse	8 mice	W=0.972 df=8 p=0.910	F=2.538 df1=1 df2=16 p=0.131	Mann-Whitney U test	Z=-0.711	p =0.477	ns
			Stage 1 S1 ChR2 n=10		10 mice	W=0.822 df=10 p=0.027
			Stage 2 S1 Control n=8		8 mice	W=0.964 df=8 p=0.850	F=1.810 df1=1 df2=16 p=0.197	Two-tailed unpaired t-test	t=-0.205 df=16	p =0.840	ns
			Stage 2 S1 ChR2 n=10		10 mice	W=0.962 df=10 p=0.811
			Stage 3 S1 Control n=8		8 mice	W=0.902 df=8 p=0.302	F=4.532 df1=1 df2=16 p=0.049	Two-tailed unpaired separate variance estimation t-test	t=-0.012 df=10.579	p=0.990	ns
			Stage 3 S1 ChR2 n=10		10 mice	W=0.972 df=10 p=0.910
			Stage 4 S1 Control n=8		8 mice	W=0.755 df=8 p=0.009	F=0.921 df1=1 df2=16 p=0.351	Mann-Whitney U test	Z=-0.355	p =0.722	ns
			Stage 4 S1 ChR2 n=10		10 mice	W=0.637 df=10 p<0.001
			Stage 5 S1 Control n=8		8 mice	W=0.892 df=8 p=0.245	F=4.804 df1=1 df2=16 p=0.044	Mann-Whitney U test	Z=-0.977	p =0.328	ns
			Stage 5 S1 ChR2 n=10		10 mice	W=0.535 df=10 p<0.001
Supplementary Figure 7K	Percentage of total grooming duration of S1	WT mouse	Stage 1 S1 Control n=8	mouse	8 mice	W=0.905 df=8 p=0.317	F=0.114 df1=1 df2=16 p=0.740	Two-tailed unpaired t-test	t=-0.515 df=16	p =0.613	ns
			Stage 1 S1 ChR2 n=10		10 mice	W=0.897 df=10 p=0.204
			Stage 2 S1 Control n=8		8 mice	W=0.923 df=8 p=0.451	F=3.016 df1=1 df2=16 p=0.102	Two-tailed unpaired t-test	t=-0.525 df=16	p =0.607	ns
			Stage 2 S1 ChR2 n=10		10 mice	W=0.878 df=10 p=0.125
			Stage 3 S1 Control n=8		8 mice	W=0.919 df=8 p=0.420	F=0.001 df1=1 df2=16 p=0.980	Two-tailed unpaired t-test	t=1.604 df=16	p =0.128	ns
			Stage 3 S1 ChR2 n=10		10 mice	W=0.903 df=10 p=0.238
			Stage 4 S1 Control n=8		8 mice	W=0.892 df=8 p=0.247	F=0.2771 df1=1 df2=16 p=0.606	Mann-Whitney U test	Z=-0.089	p =0.929	ns
			Stage 4 S1 ChR2 n=10		10 mice	W=0.788 df=10 p=0.010
			Stage 5 S1 Control n=8		8 mice	W=0.929 df=8 p=0.511	F=3.814 df1=1 df2=16 p=0.069	Mann-Whitney U test	Z=-1.244	p =0.214	ns
			Stage 5 S1 ChR2 n=10		10 mice	W=0.556 df=10 p<0.001
Supplementary Figure 7L	Total transitions of S1	WT mouse	S1 Control n=8	mouse	8 mice	W=0.975 df=8 p=0.936	F=0.0271 df1=1 df2=16 p=0.872	Two-tailed unpaired t-test	t=-0.997 df=16	p =0.334	ns
			S1 ChR2 n=10		10 mice	W=0.931 df=10 p=0.458
Supplementary Figure 9C	Grooming duration of MD-DLS	WT mouse	Stage 1 MD-DLS Control n=7	mouse	7 mice	W=0.974 df=7 p=0.924	F=0.885 df1=1 df2=15 p=0.362	Two-tailed unpaired t-test	t=0.532 df=15	p=0.603	ns
			Stage 1 MD-DLS ChR2 n=10		10 mice	W=0.870 df=10 p=0.101
			Stage 2 MD-DLS Control n=7		7 mice	W=0.935 df=7 p=0.594	F=5.435 df1=1 df2=15 p=0.034	Two-tailed unpaired separate variance estimation t-test	t=-2.599 df=11.966	p=0.023	*
			Stage 2 MD-DLS ChR2 n=10		10 mice	W=0.903 df=10 p=0.235
			Stage 3 MD-DLS Control n=7		7 mice	W=0.837 df=7 p=0.093	F=1.580 df1=1 df2=15 p=0.228	Two-tailed unpaired t-test	t=-4.504 df=15	p<0.001	***
			Stage 3 MD-DLS ChR2 n=10		10 mice	W=0.973 df=10 p=0.914
			Stage 4 MD-DLS Control n=7		7 mice	W=0.713 df=7 p=0.005	F=14.252 df1=1 df2=15 p=0.002	Mann-Whitney U test	Z=-2.733	p=0.006	**
			Stage 4 MD-DLS ChR2 n=10		10 mice	W=0.917 df=10 p=0.336
			Stage 5 MD-DLS Control n=7		7 mice	W=0.745 df=7 p=0.011	F=0.006 df1=1 df2=15 p=0.937	Mann-Whitney U test	Z=-0.635	p=0.526	ns
			Stage 5 MD-DLS ChR2 n=10		10 mice	W=0.632 df=10 p<0.001
Supplementary Figure 9D	Grooming duration of BLA-DLS	WT mouse	Stage 1 BLA-DLS Control n=9	mouse	9 mice	W=0.879 df=9 p=0.152	F=1.041 df1=1 df2=15 p=0.324	Two-tailed unpaired t-test	t=0.601 df=15	p=0.557	ns
			Stage 1 BLA-DLS ChR2 n=8		8 mice	W=0.909 df=8 p=0.347
			Stage 2 BLA-DLS Control n=9		9 mice	W=0.949 df=9 p=0.674	F=4.736 df1=1 df2=15 p=0.046	Two-tailed unpaired separate variance estimation t-test	t=2.472 df=9.695	p=0.034	*
			Stage 2 BLA-DLS ChR2 n=8		8 mice	W=0.848 df=8 p=0.091
			Stage 3 BLA-DLS Control n=9		9 mice	W=0.811 df=9 p=0.027	F=3.256 df1=1 df2=15 p=0.091	Mann-Whitney U test	Z=-3.079	p=0.002	**
			Stage 3 BLA-DLS ChR2 n=8		8 mice	W=0.929 df=8 p=0.504
			Stage 4 BLA-DLS Control n=9		9 mice	W=0.925 df=9 p=0.439	F=17.072 df1=1 df2=15 p<0.001	Mann-Whitney U test	Z=-2.502	p=0.012	*
			Stage 4 BLA-DLS ChR2 n=8		8 mice	W=0.799 df=8 p=0.028
			Stage 5 BLA-DLS Control n=9		9 mice	W=0.507 df=9 p<0.001	F=4.657 df1=1 df2=15 p=0.048	Mann-Whitney U test	Z=-1.279	p=0.201	ns
			Stage 5 BLA-DLS ChR2 n=8		8 mice	W=0.449 df=8 p<0.001
Supplementary Figure 10E	Grooming duration (Gq)	WT mouse	MD-DLS Saline n=7	mouse	7 mice	W=0.892 df=7 p=0.284	F=0.963 df1=1 df2=12 p=0.346	Two-tailed paired t-test	t=-2.628 df=6	p=0.039	*
			MD-DLS C21 n=7		7 mice	W=0.937 df=7 p=0.609
	Grooming duration (GFP)		MD-DLS Saline n=6		6 mice	W=0.920 df=6 p=0.502	F=0.322 df1=1 df2=10 p=0.583	Two-tailed paired t-test	t=-0.968 df=5	p=0.378	ns
			MD-DLS C21 n=6		6 mice	W=0.951 df=6 p=0.751
	Grooming duration (Gi)		MD-DLS Saline n=7		7 mice	W=0.914 df=7 p=0.421	F=0.308 df1=1 df2=12 p=0.589	Two-tailed paired t-test	t=5.114 df=6	p=0.002	**
			MD-DLS C21 n=7		7 mice	W=0.996 df=7 p=0.999
	Grooming duration (Gq)		MD-DLS Saline n=7		7 mice	W=0.880 df=7 p=0.228	F=1.053 df1=1 df2=12 p=0.325	Two-tailed paired t-test	t=-2.200 df=6	p=0.070	ns
			MD-DLS C21 n=7		7 mice	W=0.909 df=7 p=0.392
	Grooming duration (GFP)		MD-DLS Saline n=6		6 mice	W=0.775 df=6 p=0.035	F=0.804 df1=1 df2=10 p=0.391	Wilcoxon signed-rank test	Z=-0.527	p=0.598	ns
			MD-DLS C21 n=6		6 mice	W=0.924 df=6 p=0.535
	Grooming duration (Gi)		MD-DLS Saline n=7		7 mice	W=0.893 df=7 p=0.292	F=2.633 df1=1 df2=12 p=0.131	Wilcoxon signed-rank test	Z=-0.638	p=0.524	ns
			MD-DLS C21 n=7		7 mice	W=0.808 df=7 p=0.049
	Grooming duration (Gq)		MD-DLS Saline n=7		7 mice	W=0.927 df=7 p=0.529	F=0.122 df1=1 df2=12 p=0.733	Two-tailed paired t-test	t=-0.071 df=6	p=0.945	ns
			MD-DLS C21 n=7		7 mice	W=0.915 df=7 p=0.435
	Grooming duration (GFP)		MD-DLS Saline n=6		6 mice	W=0.889 df=6 p=0.313	F=0.684 df1=1 df2=10 p=0.428	Two-tailed paired t-test	t=-0.516 df=5	p=0.628	ns
			MD-DLS C21 n=6		6 mice	W=0.958 df=6 p=0.807
	Grooming duration (Gi)		MD-DLS Saline n=7		7 mice	W=0.956 df=7 p=0.783	F=0.273 df1=1 df2=12 p=0.611	Two-tailed paired t-test	t=2.350 df=6	p=0.057	ns
			MD-DLS C21 n=7		7 mice	W=0.920 df=7 p=0.466
Supplementary Figure 10F	Grooming duration of MD-DLS	WT mouse	Stage 1 MD-DLS Saline n=7	mouse	7 mice	W=0.844 df=7 p=0.108	F=0.027 df1=1 df2=12 p=0.872	Wilcoxon signed-rank test	Z=-0.338	p=0.735	ns
			Stage 1 MD-DLS Gi n=7		7 mice	W=0.784 df=7 p=0.028
			Stage 2 MD-DLS Saline n=7		7 mice	W=0.661 df=7 p=0.001	F=0.8347 df1=1 df2=12 p=0.379	Wilcoxon signed-rank test	Z=-1.352	p=0.176	ns
			Stage 2 MD-DLS Gi n=7		7 mice	W=0.798 df=7 p=0.039
			Stage 3 MD-DLS Saline n=7		7 mice	W=0.857 df=7 p=0.142	F=5.295 df1=1 df2=12 p=0.040	Wilcoxon signed-rank test	Z=-2.197	p=0.028	*
			Stage 3 MD-DLS Gi n=7		7 mice	W=0.928 df=7 p=0.535
			Stage 4 MD-DLS Saline n=7		7 mice	W=0.857 df=7 p=0.142	F=0.479 df1=1 df2=12 p=0.502	Wilcoxon signed-rank test	Z=-2.366	p=0.028	*
			Stage 4 MD-DLS Gi n=7		7 mice	W=0.796 df=7 p=0.037
			Stage 5 MD-DLS Saline n=7		7 mice	W=0.602 df=7 p<0.001	F=2.295 df1=1 df2=12 p=0.156	Wilcoxon signed-rank test	Z=-0.338	p=0.735	ns
			Stage 5 MD-DLS Gi n=7		7 mice	W=0.896 df=7 p=0.306
Supplementary Figure 10G	Percentage of total grooming duration of MD-DLS	WT mouse	Stage 1 MD-DLS Saline n=7	mouse	7 mice	W=0.958 df=7 p=0.800	F=1.955 df1=1 df2=12 p=0.187	Wilcoxon signed-rank test	Z=-2.028	p=0.043	*
			Stage 1 MD-DLS Gi n=7		7 mice	W=0.745 df=7 p=0.011
			Stage 2 MD-DLS Saline n=7		7 mice	W=0.898 df=7 p=0.316	F=0.090 df1=1 df2=12 p=0.769	Two-tailed paired t-test	t=1.090 df=6	p=0.317	ns
			Stage 2 MD-DLS Gi n=7		7 mice	W=0.857 df=7 p=0.141
			Stage 3 MD-DLS Saline n=7		7 mice	W=0.843 df=7 p=0.106	F=0.784 df1=1 df2=12 p=0.393	Two-tailed paired t-test	t=0.668 df=6	p=0.529	ns
			Stage 3 MD-DLS Gi n=7		7 mice	W=0.914 df=7 p=0.424
			Stage 4 MD-DLS Saline n=7		7 mice	W=0.908 df=7 p=0.380	F=2.827 df1=1 df2=12 p=0.119	Two-tailed paired t-test	t=-0.149 df=6	p=0.886	ns
			Stage 4 MD-DLS Gi n=7		7 mice	W=0.849 df=7 p=0.120
			Stage 5 MD-DLS Saline n=7		7 mice	W=0.634 df=7 p<0.001	F=0.967 df1=1 df2=12 p=0.345	Wilcoxon signed-rank test	Z=-0.338	p=0.735	ns
			Stage 5 MD-DLS Gi n=7		7 mice	W=0.934 df=7 p=0.581
Supplementary Figure 10H	Total transitions of MD-DLS	WT mouse	MD-DLS Saline n=7	mouse	7 mice	W=0.984 df=7 p=0.975	F=0.223 df1=1 df2=12 p=0.645	Two-tailed paired t-test	t=2.722 df=6	p=0.035	*
			MD-DLS Gi n=7		7 mice	W=0.891 df=7 p=0.282
Supplementary Figure 10I	Grooming duration of MD-DLS	WT mouse	Stage 1 MD-DLS Saline n=6	mouse	6 mice	W=0.843 df=6 p=0.139	F=1.897 df1=1 df2=10 p=0.198	Two-tailed paired t-test	t=-0.615 df=5	p=0.566	ns
			Stage 1 MD-DLS GFP n=6		6 mice	W=0.930 df=6 p=0.581
			Stage 2 MD-DLS Saline n=6		6 mice	W=0.976 df=6 p=0.933	F=4.084 df1=1 df2=10 p=0.071	Two-tailed paired t-test	t=-1.776 df=5	p=0.136	ns
			Stage 2 MD-DLS GFP n=6		6 mice	W=0.951 df=6 p=0.747
			Stage 3 MD-DLS Saline n=6		6 mice	W=0.975 df=6 p=0.921	F=0.035 df1=1 df2=10 p=0.855	Two-tailed paired t-test	t=-0.611 df=5	p=0.568	ns
			Stage 3 MD-DLS GFP n=6		6 mice	W=0.982 df=6 p=0.961
			Stage 4 MD-DLS Saline n=6		6 mice	W=0.826 df=6 p=0.099	F=0.374 df1=1 df2=10 p=0.554	Two-tailed paired t-test	t=1.292 df=5	p=0.253	ns
			Stage 4 MD-DLS GFP n=6		6 mice	W=0.832 df=6 p=0.111
			Stage 5 MD-DLS Saline n=6		6 mice	W=0.798 df=6 p=0.057	F=5.457 df1=1 df2=10 p=0.042	Wilcoxon signed-rank test	Z=-1.201	p=0.258	ns
			Stage 5 MD-DLS GFP n=6		6 mice	W=0.6232 df=6 p<0.001
Supplementary Figure 10J	Percentage of total grooming duration of MD-DLS	WT mouse	Stage 1 MD-DLS Saline n=6	mouse	6 mice	W=0.863 df=6 p=0.199	F=0.145 df1=1 df2=10 p=0.711	Two-tailed paired t-test	t=-0.351 df=5	p=0.740	ns
			Stage 1 MD-DLS GFP n=6		6 mice	W=0.821 df=6 p=0.091
			Stage 2 MD-DLS Saline n=6		6 mice	W=0.930 df=6 p=0.577	F=0.366 df1=1 df2=10 p=0.559	Two-tailed paired t-test	t=-1.000 df=5	p=0.363	ns
			Stage 2 MD-DLS GFP n=6		6 mice	W=0.872 df=6 p=0.236
			Stage 3 MD-DLS Saline n=6		6 mice	W=0.924 df=6 p=0.534	F=3.413 df1=1 df2=10 p=0.094	Wilcoxon signed-rank test	Z=-0.734	p=0.463	ns
			Stage 3 MD-DLS GFP n=6		6 mice	W=0.768 df=6 p=0.030
			Stage 4 MD-DLS Saline n=6		6 mice	W=0.899 df=6 p=0.366	F=0.581 df1=1 df2=10 p=0.463	Wilcoxon signed-rank test	Z=-1.363	p=0.173	ns
			Stage 4 MD-DLS GFP n=6		6 mice	W=0.765 df=6 p=0.028
			Stage 5 MD-DLS Saline n=6		6 mice	W=0.830 df=6 p=0.107	F=6.062 df1=1 df2=10 p=0.034	Wilcoxon signed-rank test	Z=-1.101	p=0.228	ns
			Stage 5 MD-DLS GFP n=6		6 mice	W=0.769 df=6 p=0.031
Supplementary Figure 10K	Total transitions of MD-DLS	WT mouse	MD-DLS Saline n=6	mouse	6 mice	W=0.922 df=6 p=0.517	F=0.012 df1=1 df2=10 p=0.916	Two-tailed paired t-test	t=-1.5409 df=5	p =0.184	ns
			MD-DLS GFP n=6		6 mice	W=0.932 df=6 p=0.598
Supplementary Figure 10L	Grooming duration of MD-DLS	WT mouse	Stage 1 MD-DLS Saline n=7	mouse	7 mice	W=0.896 df=7 p=0.307	F=2.480 df1=1 df2=12 p=0.141	Two-tailed paired t-test	t=-0.777 df=6	p=0.467	ns
			Stage 1 MD-DLS Gq n=7		7 mice	W=0.945 df=7 p=0.680
			Stage 2 MD-DLS Saline n=7		7 mice	W=0.863 df=7 p=0.161	F=0.027 df1=1 df2=12 p=0.871	Two-tailed paired t-test	t=-0.188 df=6	p=0.857	ns
			Stage 2 MD-DLS Gq n=7		7 mice	W=0.908 df=7 p=0.384
			Stage 3 MD-DLS Saline n=7		7 mice	W=0.946 df=7 p=0.694	F=1.063 df1=1 df2=12 p=0.323	Two-tailed paired t-test	t=-2.547 df=6	p=0.044	*
			Stage 3 MD-DLS Gq n=7		7 mice	W=0.985 df=7 p=0.981
			Stage 4 MD-DLS Saline n=7		7 mice	W=0.709 df=7 p=0.005	F=0.666 df1=1 df2=12 p=0.430	Wilcoxon signed-rank test	Z=-2.366	p=0.018	*
			Stage 4 MD-DLS Gq n=7		7 mice	W=0.955 df=7 p=0.779
			Stage 5 MD-DLS Saline n=7		7 mice	W=0.887 df=7 p=0.259	F=9.565 df1=1 df2=12 p=0.009	Wilcoxon signed-rank test	Z=-14.859	p=0.063	ns
			Stage 5 MD-DLS Gq n=7		7 mice	W=0.738 df=7 p=0.009
Supplementary Figure 10M	Percentage of total grooming duration of MD-DLS	WT mouse	Stage 1 MD-DLS Saline n=7	mouse	7 mice	W=0.881 df=7 p=0.231	F=0.004 df1=1 df2=12 p=0.949	Two-tailed paired t-test	t=3.018 df=6	p=0.023	*
			Stage 1 MD-DLS Gq n=7		7 mice	W=0.941 df=7 p=0.648
			Stage 2 MD-DLS Saline n=7		7 mice	W=0.846 df=7 p=0.114	F=0.715 df1=1 df2=12 p=0.414	Wilcoxon signed-rank test	Z=-1.183	p=0.237	ns
			Stage 2 MD-DLS Gq n=7		7 mice	W=0.735 df=7 p=0.009
			Stage 3 MD-DLS Saline n=7		7 mice	W=0.973 df=7 p=0.922	F=4.119 df1=1 df2=12 p=0.065	Two-tailed paired t-test	t=0.975 df=6	p=0.367	ns
			Stage 3 MD-DLS Gq n=7		7 mice	W=0.905 df=7 p=0.362
			Stage 4 MD-DLS Saline n=7		7 mice	W=0.756 df=7 p=0.015	F=1.406 df1=1 df2=12 p=0.259	Wilcoxon signed-rank test	Z=-2.366	p=0.018	*
			Stage 4 MD-DLS Gq n=7		7 mice	W=0.660 df=7 p=0.001
			Stage 5 MD-DLS Saline n=7		7 mice	W=0.901 df=7 p=0.336	F=14.107 df1=1 df2=12 p=0.003	Wilcoxon signed-rank test	Z=-1.014	p=0.310	ns
			Stage 5 MD-DLS Gq n=7		7 mice	W=0.766 df=7 p=0.019
Supplementary Figure 10N	Total transitions of MD-DLS	WT mouse	MD-DLS Saline n=7	mouse	7 mice	W=0.954 df=7 p=0.763	F=0.883 df1=1 df2=12 p=0.366	Two-tailed paired t-test	t=-2.759 df=6	p =0.033	*
			MD-DLS Gq n=7		7 mice	W=0.853 df=7 p=0.130
Supplementary Figure 11D	Grooming duration (Gq)	WT mouse	BLA-DLS Saline n=6	mouse	6 mice	W=0.929 df=6 p=0.569	F=2.345 df1=1 df2=10 p=0.157	Two-tailed paired t-test	t=3.429 df=5	p=0.019	*
			BLA-DLS C21 n=6		6 mice	W=0.840 df=6 p=0.131
	Grooming duration (GFP)		BLA-DLS Saline n=5		5 mice	W=0.878 df=5 p=0.300	F=0.670 df1=1 df2=8 p=0.437	Two-tailed paired t-test	t=-1.057 df=4	p=0.350	ns
			BLA-DLS C21 n=5		5 mice	W=0.996 df=5 p=0.995
	Grooming duration (Gi)		BLA-DLS Saline n=7		7 mice	W=0.967 df=7 p=0.875	F=0.408 df1=1 df2=12 p=0.535	Wilcoxon signed-rank test	Z=-2.366	p=0.018	*
			BLA-DLS C21 n=7		7 mice	W=0.766 df=7 p=0.019
	Grooming duration (Gq)		BLA-DLS Saline n=6		6 mice	W=0.923 df=6 p=0.529	F=2.641 df1=1 df2=10 p=0.135	Wilcoxon signed-rank test	Z=-2.226	p=0.026	*
			BLA-DLS C21 n=6		6 mice	W=0.770 df=6 p=0.031
	Grooming duration (GFP)		BLA-DLS Saline n=5		5 mice	W=0.852 df=5 p=0.201	F=2.737 df1=1 df2=8 p=0.137	Two-tailed paired t-test	t=1.365 df=4	p=0.244	ns
			BLA-DLS C21 n=5		5 mice	W=0.885 df=5 p=0.334
	Grooming duration (Gi)		BLA-DLS Saline n=7		7 mice	W=0.920 df=7 p=0.471	F=0.043 df1=1 df2=12 p=0.839	Two-tailed paired t-test	t=2.970 df=6	p=0.025	*
			BLA-DLS C21 n=7		7 mice	W=0.856 df=7 p=0.140
	Grooming duration (Gq)		BLA-DLS Saline n=6		6 mice	W=0.901 df=6 p=0.380	F=12.196 df1=1 df2=10 p=0.006	Wilcoxon signed-rank test	Z=-0.314	p=0.753	ns
			BLA-DLS C21 n=6		6 mice	W=0.896 df=6 p=0.350
	Grooming duration (GFP)		BLA-DLS Saline n=5		5 mice	W=0.930 df=5 p=0.597	F=0.207 df1=1 df2=8 p=0.661	Two-tailed paired t-test	t=-2.142 df=4	p=0.099	ns
			BLA-DLS C21 n=5		5 mice	W=0.994 df=5 p=0.992
	Grooming duration (Gi)		BLA-DLS Saline n=7		7 mice	W=0.891 df=7 p=0.282	F=1.030 df1=1 df2=12 p=0.330	Two-tailed paired t-test	t=-7.510 df=6	p<0.001	***
			BLA-DLS C21 n=7		7 mice	W=0.925 df=7 p=0.508
Supplementary Figure 11E	Grooming duration of BLA-DLS	WT mouse	Stage 1 BLA-DLS Saline n=7	mouse	7 mice	W=0.752 df=7 p=0.013	F=0.528 df1=1 df2=12 p=0.481	Wilcoxon signed-rank test	Z=-1.521	p=0.128	ns
			Stage 1 BLA-DLS Gi n=7		7 mice	W=0.805 df=7 p=0.046
			Stage 2 BLA-DLS Saline n=7		7 mice	W=0.918 df=7 p=0.452	F=1.326 df1=1 df2=12 p=0.272	Wilcoxon signed-rank test	Z=-0.845	p=0.398	ns
			Stage 2 BLA-DLS Gi n=7		7 mice	W=0.803 df=7 p=0.044
			Stage 3 BLA-DLS Saline n=7		7 mice	W=0.986 df=7 p=0.983	F=0.265 df1=1 df2=12 p=0.616	Two-tailed paired t-test	t=-7.969 df=6	p<0.001	***
			Stage 3 BLA-DLS Gi n=7		7 mice	W=0.965 df=7 p=0.860
			Stage 4 BLA-DLS Saline n=7		7 mice	W=0.681 df=7 p=0.002	F=5.099 df1=1 df2=12 p=0.043	Wilcoxon signed-rank test	Z=-2.366	p=0.018	*
			Stage 4 BLA-DLS Gi n=7		7 mice	W=0.969 df=7 p=0.888
			Stage 5 BLA-DLS Saline n=7		7 mice	W=0.853 df=7 p=0.131	F=2.143 df1=1 df2=12 p=0.169	Wilcoxon signed-rank test	Z=-0.507	p=0.612	ns
			Stage 5 BLA-DLS Gi n=7		7 mice	W=0.670 df=7 p=0.002
Supplementary Figure 11F	Percentage of total grooming duration of BLA-DLS	WT mouse	Stage 1 BLA-DLS Saline n=7	mouse	7 mice	W=0.829 df=7 p=0.078	F=7.353 df1=1 df2=12 p=0.019	Wilcoxon signed-rank test	Z=-2.366	p=0.018	*
			Stage 1 BLA-DLS Gi n=7		7 mice	W=0.852 df=7 p=0.128
			Stage 2 BLA-DLS Saline n=7		7 mice	W=0.905 df=7 p=0.364	F=0.033 df1=1 df2=12 p=0.858	Two-tailed paired t-test	t=0.963 df=6	p=0.373	ns
			Stage 2 BLA-DLS Gi n=7		7 mice	W=0.845 df=7 p=0.112
			Stage 3 BLA-DLS Saline n=7		7 mice	W=0.914 df=7 p=0.426	F=8.547 df1=1 df2=12 p=0.013	Wilcoxon signed-rank test	Z=-2.366	p=0.018	*
			Stage 3 BLA-DLS Gi n=7		7 mice	W=0.747 df=7 p=0.012
			Stage 4 BLA-DLS Saline n=7		7 mice	W=0.706 df=7 p=0.004	F=6.701 df1=1 df2=12 p=0.024	Wilcoxon signed-rank test	Z=-2.366	p=0.018	*
			Stage 4 BLA-DLS Gi n=7		7 mice	W=0.837 df=7 p=0.092
			Stage 5 BLA-DLS Saline n=7		7 mice	W=0.898 df=7 p=0.321	F=0.390 df1=1 df2=12 p=0.544	Wilcoxon signed-rank test	Z=-1.014	p=0.310	ns
			Stage 5 BLA-DLS Gi n=7		7 mice	W=0.706 df=7 p=0.004
Supplementary Figure 11G	Total transitions of BLA-DLS	WT mouse	BLA-DLS Saline n=7	mouse	7 mice	W=0.905 df=7 p=0.360	F=1.947 df1=1 df2=12 p=0.188	Two-tailed paired t-test	t=-2.704 df=6	p=0.035	*
			BLA-DLS Gi n=7		7 mice	W=0.932 df=7 p=0.572
Supplementary Figure 11H	Grooming duration of BLA-DLS	WT mouse	Stage 1 BLA-DLS Saline n=6	mouse	6 mice	W=0.932 df=6 p=0.597	F=0.259 df1=1 df2=10 p=0.622	Two-tailed paired t-test	t=1.006 df=5	p=0.361	ns
			Stage 1 BLA-DLS GFP n=6		6 mice	W=0.908 df=6 p=0.423
			Stage 2 BLA-DLS Saline n=6		6 mice	W=0.612 df=6 p<0.001	F=1.111 df1=1 df2=10 p=0.317	Wilcoxon signed-rank test	Z=-0.943	p=0.345	ns
			Stage 2 BLA-DLS GFP n=6		6 mice	W=0.897 df=6 p=0.357
			Stage 3 BLA-DLS Saline n=6		6 mice	W=0.947 df=6 p=0.716	F=0.402 df1=1 df2=10 p=0.540	Wilcoxon signed-rank test	Z=-1.572	p=0.116	ns
			Stage 3 BLA-DLS GFP n=6		6 mice	W=0.743 df=6 p=0.017
			Stage 4 BLA-DLS Saline n=6		6 mice	W=0.668 df=6 p=0.003	F=0.164 df1=1 df2=10 p=0.694	Wilcoxon signed-rank test	Z=-0.943	p=0.345	ns
			Stage 4 BLA-DLS GFP n=6		6 mice	W=0.836 df=6 p=0.121
			Stage 5 BLA-DLS Saline n=6		6 mice	W=0.606 df=6 p<0.001	F=0.125 df1=1 df2=10 p=0.731	Wilcoxon signed-rank test	Z=-0.943	p=0.345	ns
			Stage 5 BLA-DLS GFP n=6		6 mice	W=0.848 df=6 p=0.151
Supplementary Figure 11I	Percentage of total grooming duration of BLA-DLS	WT mouse	Stage 1 BLA-DLS Saline n=6	mouse	6 mice	W=0.979 df=6 p=0.948	F=0.421 df1=1 df2=10 p=0.531	Two-tailed paired t-test	t=1.277 df=5	p=0.258	ns
			Stage 1 BLA-DLS GFP n=6		6 mice	W=0.913 df=6 p=0.458
			Stage 2 BLA-DLS Saline n=6		6 mice	W=0.691 df=6 p=0.005	F=1.842 df1=1 df2=10 p=0.205	Wilcoxon signed-rank test	Z=-0.524	p=0.600	ns
			Stage 2 BLA-DLS GFP n=6		6 mice	W=0.916 df=6 p=0.474
			Stage 3 BLA-DLS Saline n=6		6 mice	W=0.900 df=6 p=0.376	F=3.566 df1=1 df2=10 p=0.088	Two-tailed paired t-test	t=-0.806 df=5	p=0.457	ns
			Stage 3 BLA-DLS GFP n=6		6 mice	W=0.981 df=6 p=0.954
			Stage 4 BLA-DLS Saline n=6		6 mice	W=0.685 df=6 p=0.004	F=1.681 df1=1 df2=10 p=0.224	Wilcoxon signed-rank test	Z=-0.943	p=0.345	ns
			Stage 4 BLA-DLS GFP n=6		6 mice	W=0.922 df=6 p=0.517
			Stage 5 BLA-DLS Saline n=6		6 mice	W=0.621 df=6 p<0.001	F=0.215 df1=1 df2=10 p=0.653	Wilcoxon signed-rank test	Z=-1.572	p=0.116	ns
			Stage 5 BLA-DLS GFP n=6		6 mice	W=0.914 df=6 p=0.464
Supplementary Figure 11J	Total transitions of BLA-DLS	WT mouse	BLA-DLS Saline n=6	mouse	6 mice	W=0.988 df=6 p=0.983	F=2.788 df1=1 df2=10 p=0.126	Two-tailed paired t-test	t=-1.992 df=5	p=0.103	ns
			BLA-DLS GFP n=6		6 mice	W=0.843 df=6 p=0.137
Supplementary Figure 11K	Grooming duration of BLA-DLS	WT mouse	Stage 1 BLA-DLS Saline n=7	mouse	7 mice	W=0.797 df=7 p=0.038	F=1.974 df1=1 df2=12 p=0.185	Wilcoxon signed-rank test	Z=-1.014	p=0.310	ns
			Stage 1 BLA-DLS Gq n=7		7 mice	W=0.807 df=7 p=0.048
			Stage 2 BLA-DLS Saline n=7		7 mice	W=0.685 df=7 p=0.003	F=4.736 df1=1 df2=12 p=0.050	Wilcoxon signed-rank test	Z=-2.197	p=0.028	*
			Stage 2 BLA-DLS Gq n=7		7 mice	W=0.956 df=7 p=0.787
			Stage 3 BLA-DLS Saline n=7		7 mice	W=0.965 df=7 p=0.859	F=5.907 df1=1 df2=12 p=0.032	Wilcoxon signed-rank test	Z=-2.197	p=0.028	*
			Stage 3 BLA-DLS Gq n=7		7 mice	W=0.916 df=7 p=0.437
			Stage 4 BLA-DLS Saline n=7		7 mice	W=0.581 df=7 p<0.001	F=3.030 df1=1 df2=12 p=0.107	Wilcoxon signed-rank test	Z=-1.352	p=0.176	ns
			Stage 4 BLA-DLS Gq n=7		7 mice	W=0.722 df=7 p=0.006
			Stage 5 BLA-DLS Saline n=7		7 mice	W=0.534 df=7 p<0.001	F=2.874 df1=1 df2=12 p=0.116	Wilcoxon signed-rank test	Z=-0.169	p=0.866	ns
			Stage 5 BLA-DLS Gq n=7		7 mice	W=0.624 df=7 p<0.001
Supplementary Figure 11L	Percentage of total grooming duration of BLA-DLS	WT mouse	Stage 1 BLA-DLS Saline n=7	mouse	7 mice	W=0.929 df=7 p=0.542	F=0.824 df1=1 df2=12 p=0.382	Two-tailed paired t-test	t=-0.761 df=6	p=0.476	ns
			Stage 1 BLA-DLS Gq n=7		7 mice	W=0.938 df=7 p=0.622
			Stage 2 BLA-DLS Saline n=7		7 mice	W=0.885 df=7 p=0.252	F=0.627 df1=1 df2=12 p=0.444	Two-tailed paired t-test	t=0.616 df=6	p=0.561	ns
			Stage 2 BLA-DLS Gq n=7		7 mice	W=0.980 df=7 p=0.961
			Stage 3 BLA-DLS Saline n=7		7 mice	W=0.898 df=7 p=0.321	F=1.852 df1=1 df2=12 p=0.199	Two-tailed paired t-test	t=-0.958 df=6	p=0.375	ns
			Stage 3 BLA-DLS Gq n=7		7 mice	W=0.949 df=7 p=0.723
			Stage 4 BLA-DLS Saline n=7		7 mice	W=0.762 df=7 p=0.017	F=4.641 df1=1 df2=12 p=0.052	Wilcoxon signed-rank test	Z=-2.028	p=0.043	*
			Stage 4 BLA-DLS Gq n=7		7 mice	W=0.707 df=7 p=0.004
			Stage 5 BLA-DLS Saline n=7		7 mice	W=0.604 df=7 p<0.001	F=0.055 df1=1 df2=12 p=0.819	Wilcoxon signed-rank test	Z=-0.507	p=0.612	ns
			Stage 5 BLA-DLS Gq n=7		7 mice	W=0.626 df=7 p<0.001
Supplementary Figure 11M	Total transitions of BLA-DLS	WT mouse	BLA-DLS Saline n=7	mouse	7 mice	W=0.822 df=7 p=0.067	F=8.983 df1=1 df2=12 p=0.011	Wilcoxon signed-rank test	Z=-2.028	p=0.043	*
			BLA-DLS Gq n=7		7 mice	W=0.824 df=7 p=0.071
Supplementary Figure 12C	Area under curve (0-5 s)	WT mouse	MD-DLS Baseline n=4	mouse	4 mice	W=0.762 df=4 p=0.050	F=22.090 df1=1 df2=6 p=0.003	Wilcoxon signed-rank test	Z=-1.996	p=0.048	*
			MD-DLS Light n=4		4 mice	W=0.935 df=4 p=0.624
Supplementary Figure 12E	Area under curve (0-5 s)	WT mouse	BLA-DLS Baseline n=4	mouse	4 mice	W=0.979 df=4 p=0.897	F=3.776 df1=1 df2=6 p=0.100	Two-tailed paired t-test	t=1.500 df=3	p=0.231	ns
			BLA-DLS Light n=4		4 mice	W=0.961 df=4 p=0.784
Supplementary Figure 12F	Grooming duration of BLA-DLS	WT VGAT-Cre mouse	Stage 1 BLA-DLS Control n=8	mouse	8 mice	W=0.796 df=8 p=0.026	F=6.113 df1=1 df2=16 p=0.025	Mann-Whitney U test	Z=-0.355	p=0.722	ns
			Stage 1 BLA-DLS ChR2 n=10		10 mice	W=0.977 df=10 p=0.945
			Stage 2 BLA-DLS Control n=8		8 mice	W=0.915 df=8 p=0.394	F=1.406 df1=1 df2=16 p=0.253	Mann-Whitney U test	Z=-2.488	p=0.013	*
			Stage 2 BLA-DLS ChR2 n=10		10 mice	W=0.768 df=10 p=0.006
			Stage 3 BLA-DLS Control n=8		8 mice	W=0.909 df=8 p=0.344	F=1.062 df1=1 df2=16 p=0.318	Two-tailed unpaired t-test	t=2.234 df=16	p=0.040	*
			Stage 3 BLA-DLS ChR2 n=10		10 mice	W=0.930 df=10 p=0.452
			Stage 4 BLA-DLS Control n=8		8 mice	W=0.920 df=8 p=0.433	F=6.305 df1=1 df2=16 p=0.023	Mann-Whitney U test	Z=-1.978	p=0.045	*
			Stage 4 BLA-DLS ChR2 n=10		10 mice	W=0.752 df=10 p=0.004
			Stage 5 BLA-DLS Control n=8		8 mice	W=0.920 df=8 p=0.433	F=0.006 df1=1 df2=16 p=0.940	Mann-Whitney U test	Z=-1.066	p=0.286	ns
			Stage 5 BLA-DLS ChR2 n=10		10 mice	W=0.508 df=10 p<0.001
Supplementary Figure 12H	Grooming duration (laser on) 20Hz of BLA-DLS	WT Vglut2-Cre mouse	BLA-DLS Control n=8	mouse	8 mice	W=0.830 df=8 p=0.060	F=1.479 df1=1 df2=15 p=0.243	Mann-Whitney U test	Z=-0.385	p=0.700	ns
			BLA-DLS ChR2 n=9		9 mice	W=0.811 df=9 p=0.027
Supplementary Figure 12I	Grooming duration of BLA-DLS	WT Vglut2-Cre mouse	Stage 1 BLA-DLS Control n=8	mouse	8 mice	W=0.893 df=8 p=0.251	F=0.486 df1=1 df2=15 p=0.497	Two-tailed unpaired t-test	t=-0.014 df=15	p=0.989	ns
			Stage 1 BLA-DLS ChR2 n=9		9 mice	W=0.931 df=9 p=0.486
			Stage 2 BLA-DLS Control n=8		8 mice	W=0.872 df=8 p=0.158	F=0.020 df1=1 df2=15 p=0.889	Two-tailed unpaired t-test	t=-0.046 df=15	p=0.964	ns
			Stage 2 BLA-DLS ChR2 n=9		9 mice	W=0.930 df=9 p=0.483
			Stage 3 BLA-DLS Control n=8		8 mice	W=0.943 df=8 p=0.643	F=0.068 df1=1 df2=15 p=0.798	Two-tailed unpaired t-test	t=0.566 df=15	p=0.580	ns
			Stage 3 BLA-DLS ChR2 n=9		9 mice	W=0.929 df=9 p=0.476
			Stage 4 BLA-DLS Control n=8		8 mice	W=0.825 df=8 p=0.053	F=5.612 df1=1 df2=15 p=0.032	Mann-Whitney U test	Z=-0.626	p=0.531	ns
			Stage 4 BLA-DLS ChR2 n=9		9 mice	W=0.785 df=9 p=0.014
			Stage 5 BLA-DLS Control n=8		8 mice	W=0.756 df=8 p=0.009	F=2.809 df1=1 df2=15 p=0.114	Mann-Whitney U test	Z=-1.251	p=0.211	ns
			Stage 5 BLA-DLS ChR2 n=9		9 mice	W=0.501 df=9 p<0.001
Supplementary Figure 12J	Percentage of total grooming duration of BLA-DLS	WT Vglut2-Cre mouse	Stage 1 BLA-DLS Control n=8	mouse	8 mice	W=0.955 df=8 p=0.759	F=0.453 df1=1 df2=15 p=0.511	Two-tailed unpaired t-test	t=-0.565 df=15	p=0.580	ns
			Stage 1 BLA-DLS ChR2 n=9		9 mice	W=0.943 df=9 p=0.618
			Stage 2 BLA-DLS Control n=8		8 mice	W=0.899 df=8 p=0.282	F=0.035 df1=1 df2=15 p=0.853	Two-tailed unpaired t-test	t=-0.178 df=15	p=0.861	ns
			Stage 2 BLA-DLS ChR2 n=9		9 mice	W=0.943 df=9 p=0.681
			Stage 3 BLA-DLS Control n=8		8 mice	W=0.907 df=8 p=0.332	F=0.135 df1=1 df2=15 p=0.719	Two-tailed unpaired t-test	t=-0.007 df=15	p=0.994	ns
			Stage 3 BLA-DLS ChR2 n=9		9 mice	W=0.948 df=9 p=0.664
			Stage 4 BLA-DLS Control n=8		8 mice	W=0.881 df=8 p=0.193	F=6.296 df1=1 df2=15 p=0.024	Mann-Whitney U test	Z=-0.962	p=0.336	ns
			Stage 4 BLA-DLS ChR2 n=9		9 mice	W=0.817 df=9 p=0.032
			Stage 5 BLA-DLS Control n=8		8 mice	W=0.871 df=8 p=0.154	F=2.538 df1=1 df2=15 p=0.132	Mann-Whitney U test	Z=-0.962	p=0.336	ns
			Stage 5 BLA-DLS ChR2 n=9		9 mice	W=0.588 df=9 p<0.001
Supplementary Figure 12K	Total transitions of BLA-DLS	WT Vglut2-Cre mouse	BLA-DLS Control n=8	mouse	8 mice	W=0.854 df=8 p=0.106	F=3.024 df1=1 df2=15 p=0.103	Two-tailed unpaired t-test	t=0.819 df=15	p=0.426	ns
			BLA-DLS ChR2 n=9		9 mice	W=0.862 df=9 p=0.102
Supplementary Figure 13A	Grooming duration (laser on) 20Hz of BLA	WT Vglut2-Cre mouse	BLA Control n=8	mouse	8 mice	W=0.755 df=8 p=0.009	F=4.192 df1=1 df2=16 p=0.057	Mann-Whitney U test	Z=-0.711	p=0.477	ns
			BLA ChR2 n=10		10 mice	W=0.945 df=10 p=0.612
Supplementary Figure 13B	Grooming duration (laser on) 20Hz of BLA	WT VGAT-Cre mouse	BLA Control n=6	mouse	6 mice	W=0.966 df=6 p=0.864	F=1.525 df1=1 df2=12 p=0.240	Mann-Whitney U test	Z=-2.585	p=0.010	*
			BLA ChR2 n=8		8 mice	W=0.705 df=8 p=0.003
Supplementary Figure 13C	Grooming duration of BLA	WT Vglut2-Cre mouse	Stage 1 BLA Control n=8	mouse	8 mice	W=0.907 df=8 p=0.333	F=1.173 df1=1 df2=15 p=0.296	Mann-Whitney U test	Z=-0.385	p=0.700	ns
			Stage 1 BLA ChR2 n=9		9 mice	W=0.794 df=9 p=0.017
			Stage 2 BLA Control n=8		8 mice	W=0.951 df=8 p=0.724	F=16.646 df1=1 df2=15 p<0.001	Mann-Whitney U test	Z=-0.144	p=0.885	ns
			Stage 2 BLA ChR2 n=9		9 mice	W=0.787 df=9 p=0.014
			Stage 3 BLA Control n=8		8 mice	W=0.976 df=8 p=0.941	F=3.169 df1=1 df2=15 p=0.095	Two-tailed unpaired t-test	t=-0.355 df=15	p=0.727	ns
			Stage 3 BLA ChR2 n=9		9 mice	W=0.932 df=9 p=0.499
			Stage 4 BLA Control n=8		8 mice	W=0.740 df=8 p=0.006	F=0.829 df1=1 df2=15 p=0.377	Mann-Whitney U test	Z=-0.144	p=0.885	ns
			Stage 4 BLA ChR2 n=9		9 mice	W=0.581 df=9 p<0.001
			Stage 5 BLA Control n=8		8 mice	W=0.790 df=8 p=0.022	F=2.183 df1=1 df2=15 p=0.160	Mann-Whitney U test	Z=-0.481	p=0.630	ns
			Stage 5 BLA ChR2 n=9		9 mice	W=0.678 df=9 p<0.001
Supplementary Figure 13D	Percentage of total grooming duration of BLA	WT Vglut2-Cre mouse	Stage 1 BLA Control n=8	mouse	8 mice	W=0.917 df=8 p=0.403	F=0.111 df1=1 df2=15 p=0.744	Two-tailed unpaired t-test	t=0.354 df=15	p=0.728	ns
			Stage 1 BLA ChR2 n=9		9 mice	W=0.873 df=9 p=0.131
			Stage 2 BLA Control n=8		8 mice	W=0.980 df=8 p=0.962	F=5.535 df1=1 df2=15 p=0.033	Two-tailed unpaired separate variance estimation t-test	t=-1.120 df=10.554	p=0.266	ns
			Stage 2 BLA ChR2 n=9		9 mice	W=0.950 df=9 p=0.691
			Stage 3 BLA Control n=8		8 mice	W=0.906 df=8 p=0.327	F=0.484 df1=1 df2=15 p=0.497	Two-tailed unpaired t-test	t=0.809 df=15	p=0.431	ns
			Stage 3 BLA ChR2 n=9		9 mice	W=0.951 df=9 p=0.699
			Stage 4 BLA Control n=8		8 mice	W=0.876 df=8 p=0.174	F=0.004 df1=1 df2=15 p=0.952	Two-tailed unpaired t-test	t=-0.416 df=15	p=0.684	ns
			Stage 4 BLA ChR2 n=9		9 mice	W=0.933 df=9 p=0.511
			Stage 5 BLA Control n=8		8 mice	W=0.828 df=8 p=0.057	F=0.719 df1=1 df2=15 p=0.410	Mann-Whitney U test	Z=-0.418	p=0.630	ns
			Stage 5 BLA ChR2 n=9		9 mice	W=0.620 df=9 p<0.001
Supplementary Figure 13E	Total transitions of BLA	WT Vglut2-Cre mouse	BLA Control n=8	mouse	8 mice	W=0.944 df=8 p=0.652	F=0.639 df1=1 df2=15 p=0.437	Two-tailed unpaired t-test	t=1.237 df=15	p=0.235	ns
			BLA ChR2 n=9		9 mice	W=0.917 df=9 p=0.369
Supplementary Figure 13F	Grooming duration of BLA	WT VGAT-Cre mouse	Stage 1 BLA Control n=6	mouse	6 mice	W=0.886 df=6 p=0.297	F=0.714 df1=1 df2=12 p=0.415	Two-tailed unpaired t-test	t=0.299 df=12	p=0.770	ns
			Stage 1 BLA ChR2 n=8		8 mice	W=0.865 df=8 p=0.135
			Stage 2 BLA Control n=6		6 mice	W=0.747 df=6 p=0.019	F=2.919 df1=1 df2=12 p=0.113	Mann-Whitney U test	Z=-2.066	p=0.039	*
			Stage 2 BLA ChR2 n=8		8 mice	W=0.838 df=8 p=0.073
			Stage 3 BLA Control n=6		6 mice	W=0.959 df=6 p=0.811	F=0.689 df1=1 df2=12 p=0.423	Two-tailed unpaired t-test	t=2.638 df=12	p=0.022	*
			Stage 3 BLA ChR2 n=8		8 mice	W=0.922 df=8 p=0.447
			Stage 4 BLA Control n=6		6 mice	W=0.960 df=6 p=0.818	F=1.347 df1=1 df2=12 p=0.268	Two-tailed unpaired t-test	t=2.181 df=12	p=0.049	*
			Stage 4 BLA ChR2 n=8		8 mice	W=0.895 df=8 p=0.262
			Stage 5 BLA Control n=6		6 mice	W=0.809 df=6 p=0.071	F=11.004 df1=1 df2=12 p=0.006	Mann-Whitney U test	Z=-1.291	p=0.197	ns
			Stage 5 BLA ChR2 n=8		8 mice	W=0.710 df=8 p=0.003
Supplementary Figure 13G	Percentage of total grooming duration of BLA	WT VGAT-Cre mouse	Stage 1 BLA Control n=6	mouse	6 mice	W=0.927 df=6 p=0.560	F=5.881 df1=1 df2=12 p=0.032	Two-tailed unpaired separate variance estimation t-test	t=-2.433 df=10.755	p=0.034	*
			Stage 1 BLA ChR2 n=8		8 mice	W=0.895 df=8 p=0.259
			Stage 2 BLA Control n=6		6 mice	W=0.842 df=6 p=0.135	F=0.459 df1=1 df2=12 p=0.511	Two-tailed unpaired t-test	t=0.769 df=12	p=0.457	ns
			Stage 2 BLA ChR2 n=8		8 mice	W=0.835 df=8 p=0.067
			Stage 3 BLA Control n=6		6 mice	W=0.950 df=6 p=0.740	F=0.050 df1=1 df2=12 p=0.826	Two-tailed unpaired t-test	t=-2.344 df=12	p=0.037	*
			Stage 3 BLA ChR2 n=8		8 mice	W=0.969 df=8 p=0.891
			Stage 4 BLA Control n=6		6 mice	W=0.856 df=6 p=0.176	F=0.524 df1=1 df2=12 p=0.483	Two-tailed unpaired t-test	t=2.373 df=12	p=0.035	*
			Stage 4 BLA ChR2 n=8		8 mice	W=0.910 df=8 p=0.351
			Stage 5 BLA Control n=6		6 mice	W=0.863 df=6 p=0.198	F=1.774 df1=1 df2=12 p=0.208	Mann-Whitney U test	Z=-1.162	p=0.245	ns
			Stage 5 BLA ChR2 n=8		8 mice	W=0.764 df=8 p=0.012
Supplementary Figure 13H	Total distance of BLA-DLS	WT VGAT-Cre mouse	BLA Control n=6	mouse	6 mice	W=0.964 df=6 p=0.847	F=1.933 df1=1 df2=12 p=0.190	Two-tailed unpaired t-test	t=2.9253 df=12	p=0.013	*
			BLA ChR2 n=8		8 mice	W=0.920 df=8 p=0.433
Supplementary Figure 14D	Total distance of BLA-DLS	WT Vglut2-Cre mouse	BLA-DLS Control n=8	mouse	8 mice	W=0.932 df=8 p=0.534	F=0.053 df1=1 df2=15 p=0.821	Two-tailed unpaired t-test	t=2.387 df=15	p=0.031	*
			BLA-DLS ChR2 n=9		9 mice	W=0.900 df=9 p=0.251
Supplementary Figure 14E	Time in center of BLA-DLS	WT Vglut2-Cre mouse	BLA-DLS Control n=8	mouse	8 mice	W=0.935 df=8 p=0.561	F=1.136 df1=1 df2=15 p=0.303	Two-tailed unpaired t-test	t=2.275 df=15	p=0.038	*
			BLA-DLS ChR2 n=9		9 mice	W=0.956 df=9 p=0.754
Supplementary Figure 14F	Total distance of BLA-DLS	WT Vglut2-Cre mouse	BLA-DLS Control n=8	mouse	8 mice	W=0.815 df=8 p=0.041	F=2.063 df1=1 df2=15 p=0.171	Mann-Whitney U test	Z=-0.962	p=0.336	ns
			BLA-DLS ChR2 n=9		9 mice	W=0.826 df=9 p=0.041
	Time in open arms of BLA-DLS	WT Vglut2-Cre mouse	BLA-DLS Control n=8	mouse	8 mice	W=0.896 df=8 p=0.264	F=0.684 df1=1 df2=15 p=0.421	Mann-Whitney U test	Z=-2.117	p=0.034	*
			BLA-DLS ChR2 n=9		9 mice	W=0.779 df=9 p=0.012
Supplementary Figure 15B	Area under curve (0-5 s) of DLS Total	Restraint mouse	MD Control n=8	mouse	8 mice	W=0.930 df=8 p=0.520	F=0.027 df1=1 df2=14 p=0.873	Two-tailed unpaired t-test	t=0.537 df=14	p=0.600	ns
			MD Restraint n=8		8 mice	W=0.828 df=8 p=0.057
	Area under curve (0-5 s) of DLS Stage 1	Restraint mouse	MD Control n=8	mouse	8 mice	W=0.911 df=8 p=0.360	F=0.001 df1=1 df2=14 p=0.998	Two-tailed unpaired t-test	t=3.138 df=14	p=0.007	**
			MD Restraint n=8		8 mice	W=0.927 df=8 p=0.485
	Area under curve (0-5 s) of DLS Stage 2	Restraint mouse	MD Control n=8	mouse	8 mice	W=0.949 df=8 p=0.697	F=0.022 df1=1 df2=14 p=0.884	Two-tailed unpaired t-test	t=-0.221 df=14	p=0.828	ns
			MD Restraint n=8		8 mice	W=0.926 df=8 p=0.480
	Area under curve (0-5 s) of DLS Stage 3	Restraint mouse	MD Control n=8	mouse	8 mice	W=0.872 df=8 p=0.159	F=0.184 df1=1 df2=14 p=0.675	Two-tailed unpaired t-test	t=0.283 df=14	p=0.781	ns
			MD Restraint n=8		8 mice	W=0.866 df=8 p=0.138
	Area under curve (0-5 s) of DLS Stage 4	Restraint mouse	MD Control n=8	mouse	8 mice	W=0.945 df=8 p=0.661	F=0.346 df1=1 df2=14 p=0.566	Two-tailed unpaired t-test	t=-0.500 df=14	p=0.625	ns
			MD Restraint n=8		8 mice	W=0.935 df=8 p=0.563
	Area under curve (0-5 s) of DLS Stage 5	Restraint mouse	MD Control n=7	mouse	7 mice	W=0.983 df=7 p=0.973	F=0.018 df1=1 df2=13 p=0.894	Two-tailed unpaired t-test	t=-0.788 df=13	p=0.445	ns
			MD Restraint n=8		8 mice	W=0.991 df=8 p=0.996
Supplementary Figure 15E	Grooming duration (laser on) 20Hz of MD-DLS	WT restraint mouse	MD-DLS Control n=6	mouse	6 mice	W=0.946 df=6 p=0.710	F=0.416 df1=1 df2=12 p=0.531	Two-tailed unpaired t-test	t=1.035 df=12	p=0.321	ns
			MD-DLS NpHR n=8		8 mice	W=0.925 df=8 p=0.474
Supplementary Figure 15G	Grooming duration (laser on) 20Hz of BLA-DLS	WT restraint mouse	BLA-DLS Control n=6	mouse	6 mice	W=0.885 df=6 p=0.292	F=2.820 df1=1 df2=10 p=0.124	Two-tailed unpaired t-test	t=2.993 df=12	p=0.014	*
			BLA-DLS ChR2 n=6		6 mice	W=0.948 df=6 p=0.724
Supplementary Figure 15H	Grooming duration of MD-DLS	WT restraint mouse	Stage 1 MD-DLS Control n=6	mouse	6 mice	W=0.768 df=6 p=0.030	F=2.284 df1=1 df2=12 p=0.157	Mann-Whitney U test	Z=-1.162	p=0.245	ns
			Stage 1 MD-DLS NpHR n=8		8 mice	W=0.858 df=8 p=0.114
			Stage 2 MD-DLS Control n=6		6 mice	W=0.763 df=6 p=0.026	F=1.551 df1=1 df2=12 p=0.237	Mann-Whitney U test	Z=-0.775	p=0.439	ns
			Stage 2 MD-DLS NpHR n=8		8 mice	W=0.822 df=8 p=0.049
			Stage 3 MD-DLS Control n=6		6 mice	W=0.923 df=6 p=0.525	F=0.001 df1=1 df2=12 p=0.982	Two-tailed unpaired t-test	t=-1.121 df=12	p=0.284	ns
			Stage 3 MD-DLS NpHR n=8		8 mice	W=0.914 df=8 p=0.382
			Stage 4 MD-DLS Control n=6		6 mice	W=0.686 df=6 p=0.004	F=0.702 df1=1 df2=12 p=0.418	Mann-Whitney U test	Z=-1.033	p=0.302	ns
			Stage 4 MD-DLS NpHR n=8		8 mice	W=0.781 df=8 p=0.018
			Stage 5 MD-DLS Control n=6		6 mice	W=0.834 df=6 p=0.115	F=6.125 df1=1 df2=12 p=0.028	Mann-Whitney U test	Z=-1.162	p=0.245	ns
			Stage 5 MD-DLS NpHR n=8		8 mice	W=0.722 df=8 p=0.004
Supplementary Figure 15I	Percentage of total grooming duration of MD-DLS	WT restraint mouse	Stage 1 MD-DLS Control n=6	mouse	6 mice	W=0.836 df=6 p=0.121	F=0.078 df1=1 df2=12 p=0.785	Two-tailed unpaired t-test	t=-0.927 df=12	p=0.372	ns
			Stage 1 MD-DLS NpHR n=8		8 mice	W=0.890 df=8 p=0.236
			Stage 2 MD-DLS Control n=6		6 mice	W=0.678 df=6 p=0.004	F=0.244 df1=1 df2=12 p=0.631	Mann-Whitney U test	Z=-1.162	p=0.245	ns
			Stage 2 MD-DLS NpHR n=8		8 mice	W=0.730 df=8 p=0.005
			Stage 3 MD-DLS Control n=6		6 mice	W=0.935 df=6 p=0.623	F=1.923 df1=1 df2=12 p=0.191	Two-tailed unpaired t-test	t=-1.791 df=12	p=0.099	ns
			Stage 3 MD-DLS NpHR n=8		8 mice	W=0.955 df=8 p=0.758
			Stage 4 MD-DLS Control n=6		6 mice	W=0.814 df=6 p=0.078	F=1.432 df1=1 df2=12 p=0.255	Mann-Whitney U test	Z=-1.033	p=0.302	ns
			Stage 4 MD-DLS NpHR n=8		8 mice	W=0.779 df=8 p=0.017
			Stage 5 MD-DLS Control n=6		6 mice	W=0.843 df=6 p=0.139	F=5.925 df1=1 df2=12 p=0.031	Mann-Whitney U test	Z=-1.162	p=0.245	ns
			Stage 5 MD-DLS NpHR n=8		8 mice	W=0.756 df=8 p=0.009
Supplementary Figure 15J	Total transitions of MD-DLS	WT restraint mouse	MD-DLS Control n=8	mouse	6 mice	W=0.687 df=6 p=0.004	F=0.001 df1=1 df2=12 p=0.998	Mann-Whitney U test	Z=-0.904	p=0.366	ns
			MD-DLS NpHR n=8		8 mice	W=0.948 df=8 p=0.691
Supplementary Figure 15K	Grooming duration of BLA-DLS	WT VGAT-Cre restraint mouse	Stage 1 BLA-DLS Control n=6	mouse	6 mice	W=0.812 df=6 p=0.076	F=1.646 df1=1 df2=10 p=0.254	Two-tailed unpaired t-test	t=0.479 df=10	p=0.642	ns
			Stage 1 BLA-DLS ChR2 n=6		6 mice	W=0.917 df=6 p=0.484
			Stage 2 BLA-DLS Control n=6		6 mice	W=0.878 df=6 p=0.258	F=1.031 df1=1 df2=10 p=0.334	Two-tailed unpaired t-test	t=2.653 df=10	p=0.024	*
			Stage 2 BLA-DLS ChR2 n=6		6 mice	W=0.938 df=6 p=0.640
			Stage 3 BLA-DLS Control n=6		6 mice	W=0.966 df=6 p=0.868	F=13.138 df1=1 df2=10 p=0.005	Two-tailed unpaired separate variance estimation t-test	t=4.905 df=5.822	p=0.003	**
			Stage 3 BLA-DLS ChR2 n=6		6 mice	W=0.797 df=6 p=0.055
			Stage 4 BLA-DLS Control n=6		6 mice	W=0.858 df=6 p=0.183	F=32.610 df1=1 df2=10 p=0.001	Mann-Whitney U test	Z=-2.887	p=0.004	**
			Stage 4 BLA-DLS ChR2 n=6		6 mice	W=0.790 df=6 p=0.048
			Stage 5 BLA-DLS Control n=6		6 mice	W=0.676 df=6 p=0.003	F=4.812 df1=1 df2=10 p=0.053	Mann-Whitney U test	Z=-0.480	p=0.631	ns
			Stage 5 BLA-DLS ChR2 n=6		6 mice	W=0.786 df=6 p=0.044
Supplementary Figure 15L	Percentage of total grooming duration of BLA-DLS	WT VGAT-Cre restraint mouse	Stage 1 BLA-DLS Control n=6	mouse	6 mice	W=0.957 df=6 p=0.794	F=0.849 df1=1 df2=10 p=0.378	Two-tailed unpaired t-test	t=-1.764 df=10	p=0.108	ns
			Stage 1 BLA-DLS ChR2 n=6		6 mice	W=0.815 df=6 p=0.080
			Stage 2 BLA-DLS Control n=6		6 mice	W=0.908 df=6 p=0.425	F=11.928 df1=1 df2=10 p=0.006	Two-tailed unpaired separate variance estimation t-test	t=-2.286 df=6.535	p=0.045	*
			Stage 2 BLA-DLS ChR2 n=6		6 mice	W=0.928 df=6 p=0.561
			Stage 3 BLA-DLS Control n=6		6 mice	W=0.954 df=6 p=0.770	F=0.026 df1=1 df2=10 p=0.874	Two-tailed unpaired t-test	t=0.928 df=10	p=0.375	ns
			Stage 3 BLA-DLS ChR2 n=6		6 mice	W=0.862 df=6 p=0.197
			Stage 4 BLA-DLS Control n=6		6 mice	W=0.884 df=6 p=0.288	F=1.394 df1=1 df2=10 p=0.265	Mann-Whitney U test	Z=-1.972	p=0.045	*
			Stage 4 BLA-DLS ChR2 n=6		6 mice	W=0.564 df=6 p<0.001
			Stage 5 BLA-DLS Control n=6		6 mice	W=0.760 df=6 p=0.025	F=0.009 df1=1 df2=10 p=0.927	Mann-Whitney U test	Z=-0.160	p=0.873	ns
			Stage 5 BLA-DLS ChR2 n=6		6 mice	W=0.876 df=6 p=0.250
Supplementary Figure 15M	Total transitions of BLA-DLS	WT VGAT-Cre restraint mouse	BLA-DLS Control n=6	mouse	6 mice	W=0.889 df=6 p=0.315	F=2.836 df1=1 df2=10 p=0.123	Two-tailed unpaired t-test	t=2.739 df=10	p=0.021	*
			BLA-DLS ChR2 n=6		6 mice	W=0.895 df=6 p=0.348
Supplementary Figure 16E	Grooming duration of BLA-DLS	WT FoscreER mouse	Stage 1 BLA-DLS Control n=6	mouse	6 mice	W=0.890 df=6 p=0.318	F=1.281 df1=1 df2=10 p=0.284	Two-tailed unpaired t-test	t=2.230 df=10	p=0.049	*
			Stage 1 BLA-DLS ChR2 n=6		6 mice	W=0.880 df=6 p=0.268
			Stage 2 BLA-DLS Control n=6		6 mice	W=0.966 df=6 p=0.866	F=2.547 df1=1 df2=10 p=0.284	Mann-Whitney U test	Z=-0.480	p=0.631	ns
			Stage 2 BLA-DLS ChR2 n=6		6 mice	W=0.660 df=6 p=0.002
			Stage 3 BLA-DLS Control n=6		6 mice	W=0.915 df=6 p=0.468	F=0.086 df1=1 df2=10 p=0.776	Two-tailed unpaired t-test	t=2.568 df=10	p=0.028	*
			Stage 3 BLA-DLS ChR2 n=6		6 mice	W=0.941 df=6 p=0.670
			Stage 4 BLA-DLS Control n=6		6 mice	W=0.871 df=6 p=0.232	F=7.769 df1=1 df2=10 p=0.019	Two-tailed unpaired separate variance estimation t-test	t=-0.758 df=6.574	p=0.475	ns
			Stage 4 BLA-DLS ChR2 n=6		6 mice	W=0.811 df=6 p=0.074
			Stage 5 BLA-DLS Control n=6		6 mice	W=0.821 df=6 p=0.090	F=18.086 df1=1 df2=10 p=0.002	Mann-Whitney U test	Z=-1.935	p=0.053	ns
			Stage 5 BLA-DLS ChR2 n=6		6 mice	W=0.734 df=6 p=0.014
Supplementary Figure 16G	Grooming duration (laser on) 20Hz of MD-DLS	WT FoscreER mouse	MD-DLS Control n=8	mouse	8 mice	W=0.988 df=8 p=0.992	F=0.927 df1=1 df2=14 p=0.352	Two-tailed unpaired t-test	t=1.144 df=14	p=0.272	ns
			MD-DLS NpHR n=8		8 mice	W=0.876 df=8 p=0.173
Supplementary Figure 16H	Grooming duration of MD-DLS	WT FoscreER mouse	Stage 1 MD-DLS Control n=8	mouse	8 mice	W=0.914 df=8 p=0.385	F=0.759 df1=1 df2=14 p=0.398	Two-tailed unpaired t-test	t=-0.027 df=14	p=0.979	ns
			Stage 1 MD-DLS NpHR n=8		8 mice	W=0.828 df=8 p=0.056
			Stage 2 MD-DLS Control n=8		8 mice	W=0.916 df=8 p=0.402	F=0.041 df1=1 df2=14 p=0.843	Two-tailed unpaired t-test	t=1.764 df=14	p=0.100	ns
			Stage 2 MD-DLS NpHR n=8		8 mice	W=0.902 df=8 p=0.299
			Stage 3 MD-DLS Control n=8		8 mice	W=0.976 df=8 p=0.941	F=0.832 df1=1 df2=14 p=0.377	Two-tailed unpaired t-test	t=1.956 df=14	p=0.071	ns
			Stage 3 MD-DLS NpHR n=8		8 mice	W=0.875 df=8 p=0.169
			Stage 4 MD-DLS Control n=8		8 mice	W=0.972 df=8 p=0.910	F=1.944 df1=1 df2=14 p=0.185	Two-tailed unpaired t-test	t=2.538 df=14	p=0.024	*
			Stage 4 MD-DLS NpHR n=8		8 mice	W=0.899 df=8 p=0.283
			Stage 5 MD-DLS Control n=8		8 mice	W=0.713 df=8 p=0.003	F=3.346 df1=1 df2=14 p=0.089	Mann-Whitney U test	Z=-1.475	p=0.140	ns
			Stage 5 MD-DLS NpHR n=8		8 mice	W=0.450 df=8 p<0.001
Supplementary Figure 16I	Percentage of total grooming duration of MD-DLS	WT FoscreER mouse	Stage 1 MD-DLS Control n=8	mouse	8 mice	W=0.894 df=8 p=0.252	F=2.901 df1=1 df2=14 p=0.111	Two-tailed unpaired t-test	t=-0.723 df=14	p=0.482	ns
			Stage 1 MD-DLS NpHR n=8		8 mice	W=0.868 df=8 p=0.145
			Stage 2 MD-DLS Control n=8		8 mice	W=0.531 df=8 p<0.001	F=2.787 df1=1 df2=14 p=0.117	Mann-Whitney U test	Z=-0.210	p=0.834	ns
			Stage 2 MD-DLS NpHR n=8		8 mice	W=0.793 df=8 p=0.024
			Stage 3 MD-DLS Control n=8		8 mice	W=0.911 df=8 p=0.363	F=0.506 df1=1 df2=14 p=0.489	Two-tailed unpaired t-test	t=-0.128 df=14	p=0.900	ns
			Stage 3 MD-DLS NpHR n=8		8 mice	W=0.969 df=8 p=0.891
			Stage 4 MD-DLS Control n=8		8 mice	W=0.971 df=8 p=0.905	F=1.207 df1=1 df2=14 p=0.291	Mann-Whitney U test	Z=-1.260	p=0.208	ns
			Stage 4 MD-DLS NpHR n=8		8 mice	W=0.757 df=8 p=0.010
			Stage 5 MD-DLS Control n=8		8 mice	W=0.806 df=8 p=0.034	F=2.606 df1=1 df2=14 p=0.129	Mann-Whitney U test	Z=-0.948	p=0.343	ns
			Stage 5 MD-DLS NpHR n=8		8 mice	W=0.495 df=8 p<0.001
Supplementary Figure 16J	Total transitions of MD-DLS	WT FoscreER mouse	MD-DLS Control n=8	mouse	8 mice	W=0.973 df=8 p=0.920	F=0.819 df1=1 df2=14 p=0.381	Two-tailed unpaired t-test	t=1.076 df=14	p=0.300	ns
			MD-DLS NpHR n=8		8 mice	W=0.881 df=8 p=0.194
Supplementary Figure 17A-B	Area under curve (0-5 s) of DLS Total	Shank3B KO mouse	MD Control n=8	mouse	8 mice	W=0.828 df=8 p=0.057	F=0.739 df1=1 df2=15 p=0.403	Two-tailed unpaired t-test	t=-0.267 df=15	p=0.793	ns
			MD Restraint n=9		9 mice	W=0.972 df=9 p=0.910
	Area under curve (0-5 s) of DLS Stage 1		MD Control n=8	mouse	8 mice	W=0.973 df=8 p=0.922	F=4.388 df1=1 df2=15 p=0.054	Two-tailed unpaired t-test	t=2.472 df=15	p=0.026	*
			MD Restraint n=9		9 mice	W=0.929 df=9 p=0.475
	Area under curve (0-5 s) of DLS Stage 2		MD Control n=8	mouse	8 mice	W=0.970 df=8 p=0.894	F=0.716 df1=1 df2=15 p=0.411	Two-tailed unpaired t-test	t=0.233 df=15	p=0.819	ns
			MD Restraint n=9		9 mice	W=0.931 df=9 p=0.491
	Area under curve (0-5 s) of DLS Stage 3		MD Control n=8	mouse	8 mice	W=0.923 df=8 p=0.451	F=5.362 df1=1 df2=15 p=0.035	Two-tailed unpaired separate variance estimation t-test	t=2.158 df=10.246	p=0.048	*
			MD Restraint n=9		9 mice	W=0.891 df=9 p=0.206
	Area under curve (0-5 s) of DLS Stage 4		MD Control n=8	mouse	8 mice	W=0.926 df=8 p=0.478	F=1.197 df1=1 df2=15 p=0.291	Two-tailed unpaired t-test	t=-2.159 df=15	p=0.047	*
			MD Restraint n=9		9 mice	W=0.944 df=9 p=0.625
	Area under curve (0-5 s) of DLS Stage 5		MD Control n=7	mouse	7 mice	W=0.863 df=7 p=0.160	F=0.005 df1=1 df2=12 p=0.948	Two-tailed unpaired t-test	t=0.121 df=12	p=0.906	ns
			MD Restraint n=7		7 mice	W=0.948 df=7 p=0.715
Supplementary Figure 17C	Grooming duration of MD-DLS	Shank3B KO mouse	Stage 1 MD-DLS Control n=8	mouse	8 mice	W=0.826 df=8 p=0.054	F=0.711 df1=1 df2=15 p=0.412	Mann-Whitney U test	Z=-0.962	p=0.336	ns
			Stage 1 MD-DLS NpHR n=9		9 mice	W=0.775 df=9 p=0.011
			Stage 2 MD-DLS Control n=8		8 mice	W=0.763 df=8 p=0.011	F=1.686 df1=1 df2=15 p=0.214	Two-tailed unpaired t-test	t=0.518 df=15	p=0.612	ns
			Stage 2 MD-DLS NpHR n=9		9 mice	W=0.894 df=9 p=0.220
			Stage 3 MD-DLS Control n=8		8 mice	W=0.822 df=8 p=0.049	F=0.982 df1=1 df2=15 p=0.337	Mann-Whitney U test	Z=-2.791	p=0.005	**
			Stage 3 MD-DLS NpHR n=9		9 mice	W=0.938 df=9 p=0.557
			Stage 4 MD-DLS Control n=8		8 mice	W=0.822 df=8 p=0.198	F=6.875 df1=1 df2=15 p=0.019	Two-tailed unpaired separate variance estimation t-test	t=2.316 df=10.150	p=0.043	*
			Stage 4 MD-DLS NpHR n=9		9 mice	W=0.935 df=9 p=0.527
			Stage 5 MD-DLS Control n=8		8 mice	W=0.470 df=8 p<0.001	F=4.106 df1=1 df2=15 p=0.061	Mann-Whitney U test	Z=-1.011	p=0.312	ns
			Stage 5 MD-DLS NpHR n=9		9 mice	W=0.486 df=9 p<0.001
Supplementary Figure 17D	Grooming duration of BLA-DLS	Shank3B KO mouse	Stage 1 BLA-DLS Control n=7	mouse	7 mice	W=0.965 df=7 p=0.856	F=5.309 df1=1 df2=15 p=0.036	Two-tailed unpaired separate variance estimation t-test	t=3.669 df=7.386	p=0.002	**
			Stage 1 BLA-DLS ChR2 n=10		10 mice	W=0.937 df=10 p=0.517
			Stage 2 BLA-DLS Control n=7		7 mice	W=0.905 df=7 p=0.362	F=14.744 df1=1 df2=15 p=0.002	Mann-Whitney U test	Z=-3.029	p=0.002	**
			Stage 2 BLA-DLS ChR2 n=10		10 mice	W=0.681 df=10 p<0.001
			Stage 3 BLA-DLS Control n=7		7 mice	W=0.938 df=7 p=0.621	F=1.238 df1=1 df2=15 p=0.283	Mann-Whitney U test	Z=-2.733	p=0.006	**
			Stage 3 BLA-DLS ChR2 n=10		10 mice	W=0.810 df=10 p=0.019
			Stage 4 BLA-DLS Control n=7		7 mice	W=0.844 df=7 p=0.107	F=1.342 df1=1 df2=15 p=0.265	Mann-Whitney U test	Z=-2.054	p=0.040	*
			Stage 4 BLA-DLS ChR2 n=10		10 mice	W=0.548 df=10 p<0.001
			Stage 5 BLA-DLS Control n=7		7 mice	W=0.844 df=7 p=0.109	F=15.504 df1=1 df2=15 p=0.001	Mann-Whitney U test	Z=-2.627	p=0.009	**
			Stage 5 BLA-DLS ChR2 n=10		10 mice	W=0.418 df=10 p<0.001
Supplementary Figure 17E	Grooming duration of BLA-DLS	Shank3B KO mouse	OFF1 n=7	mouse	7 mice	W=0.832 df=7 p=0.090	F=8.001 df1=2 df2=18 p=0.003	Friedman's M test	c2=8.857 df=2	p =0.012	*
			ON n=7		7 mice	W=0.916 df=7 p=0.440
			OFF2 n=7		7 mice	W=0.886 df=7 p=0.256
			OFF1 vs. ON					Wilcoxon signed-rank test (Bonferroni correction α=0.0167)		p =0.028	*
			OFF1 vs. OFF2							p =0.310	ns
			ON vs. OFF2							p =0.018	*
Supplementary Figure 17F	Grooming duration of BLA-DLS	Shank3B KO Vglut2-Cre mouse	OFF1 n=7	mouse	7 mice	W=0.952 df=7 p=0.747	F=2.482 df1=2 df2=18 p=0.112	One-way repeated-measures analysis of variance	F=1.511 df1=2 df2=12	p=0.265	ns
			ON n=7		7 mice	W=0.887 df=7 p=0.261
			OFF2 n=7		7 mice	W=0.915 df=7 p=0.428
Supplementary Figure 17G	Grooming duration of BLA-DLS	Shank3B KO mouse	Stage 1 BLA-DLS OFF1 n=7	mouse	7 mice	W=0.868 df=7 p=0.177	F=2.121 df1=1 df2=12 p=0.171	Wilcoxon signed-rank test	Z=-1.521	p=0.128	ns
			Stage 1 BLA-DLS ON n=7		7 mice	W=0.787 df=7 p=0.031
			Stage 2 BLA-DLS OFF1 n=7		7 mice	W=0.884 df=7 p=0.243	F=0.865 df1=1 df2=12 p=0.371	Wilcoxon signed-rank test	Z=-1.183	p=0.237	ns
			Stage 2 BLA-DLS ON n=7		7 mice	W=0.747 df=7 p=0.012
			Stage 3 BLA-DLS OFF1 n=7		7 mice	W=0.865 df=7 p=0.166	F=0.154 df1=1 df2=12 p=0.701	Wilcoxon signed-rank test	Z=-2.366	p=0.018	*
			Stage 3 BLA-DLS ON n=7		7 mice	W=0.806 df=7 p=0.047
			Stage 4 BLA-DLS OFF1 n=7		7 mice	W=0.965 df=7 p=0.863	F=12.240 df1=1 df2=12 p=0.004	Wilcoxon signed-rank test	Z=-2.366	p=0.018	*
			Stage 4 BLA-DLS ON n=7		7 mice	W=0.694 df=7 p=0.003
			Stage 5 BLA-DLS OFF1 n=7		7 mice	W=0.702 df=7 p=0.004	F=11.943 df1=1 df2=12 p=0.005	Wilcoxon signed-rank test	Z=-0.105	p=0.917	ns
			Stage 5 BLA-DLS ON n=7		7 mice	W=0.929 df=7 p=0.543
Supplementary Figure 17H	Percentage of total grooming duration of BLA-DLS	Shank3B KO mouse	Stage 1 BLA-DLS OFF1 n=7	mouse	7 mice	W=0.843 df=7 p=0.106	F=0.525 df1=1 df2=12 p=0.483	Two-tailed paired t-test	t=-2.483 df=6	p=0.045	*
			Stage 1 BLA-DLS ON n=7		7 mice	W=0.892 df=7 p=0.287
			Stage 2 BLA-DLS OFF1 n=7		7 mice	W=0.937 df=7 p=0.608	F=2.328 df1=1 df2=12 p=0.153	Wilcoxon signed-rank test	Z=-2.366	p=0.018	*
			Stage 2 BLA-DLS ON n=7		7 mice	W=0.747 df=7 p=0.012
			Stage 3 BLA-DLS OFF1 n=7		7 mice	W=0.919 df=7 p=0.460	F=0.465 df1=1 df2=12 p=0.508	Two-tailed paired t-test	t=1.462 df=6	p=0.194	ns
			Stage 3 BLA-DLS ON n=7		7 mice	W=0.953 df=7 p=0.759
			Stage 4 BLA-DLS OFF1 n=7		7 mice	W=0.976 df=7 p=0.935	F=1.966 df1=1 df2=12 p=0.186	Wilcoxon signed-rank test	Z=-2.197	p=0.028	*
			Stage 4 BLA-DLS ON n=7		7 mice	W=0.644 df=7 p<0.001
			Stage 5 BLA-DLS OFF1 n=7		7 mice	W=0.721 df=7 p=0.006	F=1.018 df1=1 df2=12 p=0.333	Wilcoxon signed-rank test	Z=-0.734	p=0.463	ns
			Stage 5 BLA-DLS ON n=7		7 mice	W=0.797 df=7 p=0.038
Supplementary Figure 17I	Total transitions of BLA-DLS	Shank3B KO mouse	BLA-DLS OFF1 n=7	mouse	7 mice	W=0.891 df=7 p=0.278	F=1.555 df1=1 df2=12 p=0.236	Two-tailed paired t-test	t=4.689 df=6	p=0.003	**
			BLA-DLS ON n=7		7 mice	W=0.859 df=7 p=0.150
Supplementary Figure 17J	Grooming duration of BLA-DLS	Shank3B KO Vglut2-Cre mouse	Stage 1 BLA-DLS OFF1 n=7	mouse	7 mice	W=0.883 df=7 p=0.239	F=1.908 df1=1 df2=12 p=0.192	Two-tailed paired t-test	t=1.962 df=6	p=0.097	ns
			Stage 1 BLA-DLS ON n=7		7 mice	W=0.894 df=7 p=0.296
			Stage 2 BLA-DLS OFF1 n=7		7 mice	W=0.787 df=7 p=0.030	F=0.099 df1=1 df2=12 p=0.758	Wilcoxon signed-rank test	Z=-0.338	p=0.735	ns
			Stage 2 BLA-DLS ON n=7		7 mice	W=0.921 df=7 p=0.478
			Stage 3 BLA-DLS OFF1 n=7		7 mice	W=0.939 df=7 p=0.632	F=0.594 df1=1 df2=12 p=0.456	Two-tailed paired t-test	t=0.309 df=6	p=0.768	ns
			Stage 3 BLA-DLS ON n=7		7 mice	W=0.925 df=7 p=0.512
			Stage 4 BLA-DLS OFF1 n=7		7 mice	W=0.917 df=7 p=0.447	F=0.215 df1=1 df2=12 p=0.652	Wilcoxon signed-rank test	Z=-0.338	p=0.735	ns
			Stage 4 BLA-DLS ON n=7		7 mice	W=0.788 df=7 p=0.031
			Stage 5 BLA-DLS OFF1 n=7		7 mice	W=0.471 df=7 p<0.001	F=2.674 df1=1 df2=12 p=0.128	Wilcoxon signed-rank test	Z=-1.153	p=0.249	ns
			Stage 5 BLA-DLS ON n=7		7 mice	W=0.495 df=7 p<0.001
Supplementary Figure 17K	Percentage of total grooming duration of BLA-DLS	Shank3B KO Vglut2-Cre mouse	Stage 1 BLA-DLS OFF1 n=7	mouse	7 mice	W=0.932 df=7 p=0.567	F=2.192 df1=1 df2=12 p=0.164	Wilcoxon signed-rank test	Z=-1.859	p=0.063	ns
			Stage 1 BLA-DLS ON n=7		7 mice	W=0.798 df=7 p=0.039
			Stage 2 BLA-DLS OFF1 n=7		7 mice	W=0.803 df=7 p=0.044	F=1.044 df1=1 df2=12 p=0.327	Wilcoxon signed-rank test	Z=-0.169	p=0.866	ns
			Stage 2 BLA-DLS ON n=7		7 mice	W=0.918 df=7 p=0.455
			Stage 3 BLA-DLS OFF1 n=7		7 mice	W=0.847 df=7 p=0.115	F=2.242 df1=1 df2=12 p=0.160	Two-tailed paired t-test	t=0.732 df=6	p=0.492	ns
			Stage 3 BLA-DLS ON n=7		7 mice	W=0.907 df=7 p=0.377
			Stage 4 BLA-DLS OFF1 n=7		7 mice	W=0.856 df=7 p=0.788	F=2.753 df1=1 df2=12 p=0.123	Two-tailed paired t-test	t=-0.802 df=6	p=0.453	ns
			Stage 4 BLA-DLS ON n=7		7 mice	W=0.856 df=7 p=0.139
			Stage 5 BLA-DLS OFF1 n=7		7 mice	W=0.470 df=7 p<0.001	F=1.716 df1=1 df2=12 p=0.215	Wilcoxon signed-rank test	Z=-1.153	p=0.249	ns
			Stage 5 BLA-DLS ON n=7		7 mice	W=0.614 df=7 p<0.001
Supplementary Figure 17L	Total transitions of BLA-DLS	Shank3B KO mouse	BLA-DLS OFF1 n=7	mouse	7 mice	W=0.891 df=7 p=0.277	F=0.119 df1=1 df2=12 p=0.736	Two-tailed paired t-test	t=0.367 df=6	p=0.726	ns
			BLA-DLS ON n=7		7 mice	W=0.929 df=7 p=0.545
Supplementary Figure 18A	Total distance of MD-DLS	Shank3B KO mouse	MD-DLS Control n=8	mouse	8 mice	W=0.968 df=8 p=0.883	F=1.385 df1=1 df2=15 p=0.258	Two-tailed unpaired t-test	t=2.549 df=15	p=0.022	*
			MD-DLS NpHR n=9		9 mice	W=0.890 df=9 p=0.198
	Time in center of MD-DLS	Shank3B KO mouse	MD-DLS Control n=8	mouse	8 mice	W=0.826 df=8 p=0.054	F=0.024 df1=1 df2=15 p=0.878	Two-tailed unpaired t-test	t=-0.291 df=15	p=0.775	ns
			MD-DLS NpHR n=9		9 mice	W=0.890 df=9 p=0.200
Supplementary Figure 18D	Total distance of MD-DLS	Shank3B KO mouse	MD-DLS Control n=8	mouse	8 mice	W=0.961 df=8 p=0.815	F=0.470 df1=1 df2=15 p=0.503	Two-tailed unpaired t-test	t=-0.303 df=15	p=0.766	ns
			MD-DLS NpHR n=9		9 mice	W=0.879 df=9 p=0.154
	Time in open arms of MD-DLS	Shank3B KO mouse	MD-DLS Control n=8	mouse	8 mice	W=0.859 df=8 p=0.149	F=4.818 df1=1 df2=15 p=0.044	Mann-Whitney U test	Z=-1.828	p=0.068	ns
			MD-DLS NpHR n=9		9 mice	W=0.762 df=9 p=0.008
Supplementary Figure 18F	Total distance of BLA-DLS	Shank3B KO VGAT-Cre mouse	BLA-DLS Control n=8	mouse	8 mice	W=0.800 df=8 p=0.028	F=2.649 df1=1 df2=16 p=0.123	Mann-Whitney U test	Z=-1.244	p=0.214	ns
			BLA-DLS ChR2 n=10		10 mice	W=0.898 df=10 p=0.208
	Time in center of BLA-DLS	Shank3B KO VGAT-Cre mouse	BLA-DLS Control n=8	mouse	8 mice	W=0.783 df=8 p=0.019	F=0.343 df1=1 df2=16 p=0.566	Mann-Whitney U test	Z=-2.221	p=0.026	*
			BLA-DLS ChR2 n=10		10 mice	W=0.928 df=10 p=0.425
Supplementary Figure 18I	Total distance of BLA-DLS	Shank3B KO VGAT-Cre mouse	BLA-DLS Control n=8	mouse	8 mice	W=0.931 df=8 p=0.528	F=0.467 df1=1 df2=16 p=0.504	Two-tailed unpaired t-test	t=-1.236 df=16	p=0.234	ns
			BLA-DLS ChR2 n=10		10 mice	W=0.967 df=10 p=0.861
	Time in open arms of BLA-DLS	Shank3B KO VGAT-Cre mouse	BLA-DLS Control n=8	mouse	8 mice	W=0.792 df=8 p=0.024	F=0.178 df1=1 df2=16 p=0.679	Mann-Whitney U test	Z=-2.178	p=0.029	*
			BLA-DLS ChR2 n=10		10 mice	W=0.787 df=10 p=0.010
