# Supplementary material
Source: Research Square preprint supplement (doi:10.21203/rs.3.rs-9128688/v1)
Supplement: Supplementary file 2 [file 750f54f185b85b01e734a6ef.xlsx]

## Sheet: Sheet1
Syllable information of optogenetic stimulation dataset related to Figure 6
Mean±SEM												P value
		Control (n=8)			MD-DLS (n=8)			BLA-DLS (n=8)			MD-DLS				BLA-DLS				ON
Syllable ID	Syllable names	OFF1 (%)	ON (%)	OFF2 (%)	OFF1 (%)	ON (%)	OFF2 (%)	OFF1 (%)	ON (%)	OFF2 (%)	Hypothesis test	OFF1 vs ON	OFF1 vs OFF2	ON vs OFF2	Hypothesis test	OFF1 vs ON	OFF1 vs OFF2	ON vs OFF2	Hypothesis test	Control vs MD-DLS	Control vs BLA-DLS	MD-DLS vs BLA-DLS
1	gucken/head up	2.12±0.41	1.92±0.64	2.32±0.89	2.65±0.8	2.02±0.64	1.88±0.88	4.14±0.87	3.04±0.92	2.7±0.42	Kruskal-Wallis H test followed by Nemenyi multiple comparisons test	>0.9999	>0.9999	>0.9999	Kruskal-Wallis H test followed by Nemenyi multiple comparisons test	0.9157	0.688	>0.9999	One-factor ANOVA followed by Tukey's multiple comparisons test	0.9948	0.5472	0.6064
2	pause	3.08±0.6	2.87±0.57	1.75±0.77	1.6±0.32	2.9±1.32	1.46±0.54	1.27±0.33	8.42±2.79	1.01±0.45	Kruskal-Wallis H test followed by Nemenyi multiple comparisons test	>0.9999	>0.9999	>0.9999	Kruskal-Wallis H test followed by Nemenyi multiple comparisons test	0.0155	>0.9999	0.0034	Kruskal-Wallis H test followed by Nemenyi multiple comparisons test	>0.9999	>0.9999	0.2682
3	high wall rear	1.35±0.46	1.2±0.41	1±0.43	2.72±0.7	1.88±0.64	2.56±0.94	1.32±0.36	0.53±0.17	2.08±0.44	Kruskal-Wallis H test followed by Nemenyi multiple comparisons test	>0.9999	>0.9999	>0.9999	One-factor ANOVA followed by Tukey's multiple comparisons test	0.2589	0.2754	0.0114	Kruskal-Wallis H test followed by Nemenyi multiple comparisons test	>0.9999	0.5533	0.1152
4	rear up	8.3±0.78	7.01±0.96	8.61±0.8	7.28±1.38	6.67±1.12	8.56±1.85	8.62±1.43	3.53±1.28	8.69±0.99	One-factor ANOVA followed by Tukey's multiple comparisons test	0.953	0.6418	0.8155	One-factor ANOVA followed by Tukey's multiple comparisons test	0.023	0.9992	0.0211	Kruskal-Wallis H test followed by Nemenyi multiple comparisons test	>0.9999	0.0441	0.1316
5	observe/slight move	2.8±0.64	3.26±0.47	3.73±0.44	3.87±0.36	2.77±0.81	2.51±0.42	2.28±0.7	4.54±1.9	1.59±0.32	One-factor ANOVA followed by Tukey's multiple comparisons test	0.3726	0.9445	0.2303	Kruskal-Wallis H test followed by Nemenyi multiple comparisons test	0.6674	0.7959	0.0588	Kruskal-Wallis H test followed by Nemenyi multiple comparisons test	0.751	>0.9999	>0.9999
6	pause/head up	2.77±0.47	3.23±0.29	4.18±0.81	3.61±0.7	2.55±0.42	4.06±1.42	2.61±0.6	3.6±1.26	1.8±0.64	Kruskal-Wallis H test followed by Nemenyi multiple comparisons test	0.7737	>0.9999	>0.9999	Kruskal-Wallis H test followed by Nemenyi multiple comparisons test	>0.9999	>0.9999	0.8665	One-factor ANOVA followed by Tukey's multiple comparisons test	0.8139	0.9424	0.6199
7	jump	0.03±0.02	0.01±0.01	0.08±0.04	0.08±0.04	0.01±0.01	0.04±0.03	0.03±0.02	0.01±0.01	0.19±0.17	Kruskal-Wallis H test followed by Nemenyi multiple comparisons test	0.4277	>0.9999	>0.9999	Kruskal-Wallis H test followed by Nemenyi multiple comparisons test	>0.9999	>0.9999	>0.9999	Kruskal-Wallis H test followed by Nemenyi multiple comparisons test	>0.9999	>0.9999	>0.9999
8	dart	1.47±0.34	0.57±0.13	0.48±0.16	0.54±0.15	0.79±0.45	0.53±0.32	0.88±0.33	0.37±0.12	0.71±0.29	Kruskal-Wallis H test followed by Nemenyi multiple comparisons test	>0.9999	0.9125	>0.9999	Kruskal-Wallis H test followed by Nemenyi multiple comparisons test	>0.9999	>0.9999	>0.9999	Kruskal-Wallis H test followed by Nemenyi multiple comparisons test	>0.9999	0.6871	>0.9999
9	move then pause	1.87±0.48	3.93±0.95	2.91±0.45	4.34±1.04	1.05±0.24	2.38±1.12	1.88±0.39	3.77±1.11	0.99±0.18	Kruskal-Wallis H test followed by Nemenyi multiple comparisons test	0.0441	0.1315	>0.9999	Kruskal-Wallis H test followed by Nemenyi multiple comparisons test	0.3116	0.3116	0.0034	Kruskal-Wallis H test followed by Nemenyi multiple comparisons test	0.0175	>0.9999	0.0175
10	begin to rear up	1.56±0.43	0.66±0.2	0.92±0.27	2.33±0.20	0.84±0.25	1.42±0.35	1.31±0.18	0.45±0.2	1.02±0.22	One-factor ANOVA followed by Tukey's multiple comparisons test	0.0025	0.0677	0.3153	One-factor ANOVA followed by Tukey's multiple comparisons test	0.0025	0.0677	0.3153	Kruskal-Wallis H test followed by Nemenyi multiple comparisons test	0.8902	0.966	0.1259
11	straighten body/unmove	2.5±0.65	3.28±1.13	2.89±0.5	0.65±0.19	2.04±0.75	2.62±1.29	1.44±0.63	5.07±1.98	0.78±0.24	Kruskal-Wallis H test followed by Nemenyi multiple comparisons test	0.1011	0.2132	>0.9999	Kruskal-Wallis H test followed by Nemenyi multiple comparisons test	0.2134	>0.9999	0.0586	Kruskal-Wallis H test followed by Nemenyi multiple comparisons test	>0.9999	>0.9999	0.3846
12	bend/lower head	5.32±0.52	3.74±0.5	4.08±0.69	2.28±0.61	4.77±0.7	2.71±0.55	4.59±0.81	5.88±1.06	2.48±0.5	One-factor ANOVA followed by Tukey's multiple comparisons test	0.0249	0.8735	0.0701	One-factor ANOVA followed by Tukey's multiple comparisons test	0.5171	0.1895	0.0211	One-factor ANOVA followed by Tukey's multiple comparisons test	0.7757	0.1723	0.4742
13	straight forward	1.63±0.14	1.43±0.23	0.99±0.27	0.79±0.22	1.09±0.33	0.72±0.24	1.09±0.21	0.63±0.15	1.18±0.25	One-factor ANOVA followed by Tukey's multiple comparisons test	0.7123	0.9833	0.6055	One-factor ANOVA followed by Tukey's multiple comparisons test	0.2806	0.9556	0.1762	One-factor ANOVA followed by Tukey's multiple comparisons test	0.6168	0.0883	0.4176
14	move forward then nose poke	3.78±0.44	3.33±0.29	2.44±0.4	2.92±0.39	2.26±0.51	3.14±0.55	2.89±0.45	1.86±0.31	3.1±0.23	One-factor ANOVA followed by Tukey's multiple comparisons test	0.6093	0.9481	0.4262	One-factor ANOVA followed by Tukey's multiple comparisons test	0.1101	0.9004	0.0464	One-factor ANOVA followed by Tukey's multiple comparisons test	0.1379	0.0319	0.7437
15	squat/groom	1.25±0.41	1.93±0.58	1.88±0.56	2.11±0.35	2.62±0.77	2.39±0.43	1.7±0.52	1.19±0.6	2.4±0.22	One-factor ANOVA followed by Tukey's multiple comparisons test	0.7888	0.9279	0.9546	Kruskal-Wallis H test followed by Nemenyi multiple comparisons test	>0.9999	0.9122	0.1538	Kruskal-Wallis H test followed by Nemenyi multiple comparisons test	>0.9999	0.8602	0.2104
16	rear/squat/groom	1.87±0.69	3.4±0.96	4.23±1.07	3.08±0.49	2.75±0.7	4.41±1.13	2.68±0.74	2.39±1.2	7.51±1.53	One-factor ANOVA followed by Tukey's multiple comparisons test	0.9575	0.4911	0.3403	Kruskal-Wallis H test followed by Nemenyi multiple comparisons test	>0.9999	0.1005	0.0236	Kruskal-Wallis H test followed by Nemenyi multiple comparisons test	>0.9999	0.501	>0.9999
17	lunge forward then left turn	4.04±0.48	3.16±0.57	2.38±0.29	2.96±0.71	3.14±0.85	1.96±0.43	4.1±0.49	2.39±0.51	2.31±0.31	One-factor ANOVA followed by Tukey's multiple comparisons test	0.9807	0.5727	0.4614	One-factor ANOVA followed by Tukey's multiple comparisons test	0.0335	0.0251	0.99	One-factor ANOVA followed by Tukey's multiple comparisons test	0.9998	0.6978	0.7095
18	curvilinear walk	1.03±0.29	0.29±0.07	0.2±0.07	0.2±0.09	0.99±0.89	0.5±0.32	0.69±0.21	0.08±0.05	0.58±0.17	Kruskal-Wallis H test followed by Nemenyi multiple comparisons test	>0.9999	>0.9999	>0.9999	Kruskal-Wallis H test followed by Nemenyi multiple comparisons test	0.0333	>0.9999	0.022	Kruskal-Wallis H test followed by Nemenyi multiple comparisons test	0.5192	0.1313	>0.9999
19	sniff/head touch ground	2.18±0.33	1.87±0.42	1.99±0.37	2.01±0.47	1.98±0.32	1.92±0.45	1.63±0.18	0.57±0.22	1.26±0.27	One-factor ANOVA followed by Tukey's multiple comparisons test	0.9989	0.9891	0.9949	Kruskal-Wallis H test followed by Nemenyi multiple comparisons test	0.0198	0.6613	0.4073	Kruskal-Wallis H test followed by Nemenyi multiple comparisons test	0.9698	0.0284	0.017
20	turn head	3.15±0.62	3.32±0.48	2.37±0.22	2.96±1.02	2.8±0.63	2.49±0.98	3.18±0.48	0.78±0.27	2.32±0.68	One-factor ANOVA followed by Tukey's multiple comparisons test	0.9913	0.9258	0.9665	One-factor ANOVA followed by Tukey's multiple comparisons test	0.0078	0.4633	0.1013	One-factor ANOVA followed by Tukey's multiple comparisons test	0.7294	0.0033	0.019
21	slight move then pause	5.21±1.19	4.63±1.1	3.66±0.9	5.42±1.2	5.55±1.65	4±0.59	3.64±0.88	6.28±2.27	1.78±0.37	One-factor ANOVA followed by Tukey's multiple comparisons test	0.9968	0.6968	0.6504	One-factor ANOVA followed by Tukey's multiple comparisons test	0.4011	0.6307	0.0869	One-factor ANOVA followed by Tukey's multiple comparisons test	0.9262	0.7818	0.9521
22	squat/rear	1.58±0.36	3.12±0.79	4.35±0.85	3.57±0.61	2.25±0.47	3.46±0.97	3.58±0.64	3.51±0.74	4.01±0.64	One-factor ANOVA followed by Tukey's multiple comparisons test	0.4106	0.993	0.4732	One-factor ANOVA followed by Tukey's multiple comparisons test	0.9971	0.8952	0.8614	One-factor ANOVA followed by Tukey's multiple comparisons test	0.6491	0.9139	0.4105
23	squat/head up	2.4±0.41	4.2±0.66	4.83±1	3.55±0.45	2.46±0.61	3.14±0.53	3.81±0.61	2.95±1	3.63±0.56	One-factor ANOVA followed by Tukey's multiple comparisons test	0.336	0.8474	0.6484	One-factor ANOVA followed by Tukey's multiple comparisons test	0.6981	0.9846	0.7961	One-factor ANOVA followed by Tukey's multiple comparisons test	0.2721	0.4975	0.8978
24	straighten body/raise head	2.85±0.46	3.26±0.61	4.21±0.76	1.53±0.27	2.5±0.58	2.74±0.66	1.47±0.59	2.73±0.78	1.92±0.32	Kruskal-Wallis H test followed by Nemenyi multiple comparisons test	0.6478	0.4719	>0.9999	One-factor ANOVA followed by Tukey's multiple comparisons test	0.3151	0.8548	0.612	Kruskal-Wallis H test followed by Nemenyi multiple comparisons test	0.8659	>0.9999	>0.9999
25	move forward then right turn	1.98±0.23	1.42±0.27	1.27±0.31	1.25±0.3	1.4±0.52	1.06±0.5	1.59±0.47	0.3±0.12	1.68±0.23	Kruskal-Wallis H test followed by Nemenyi multiple comparisons test	>0.9999	0.965	>0.9999	One-factor ANOVA followed by Tukey's multiple comparisons test	0.02	0.9769	0.0127	Kruskal-Wallis H test followed by Nemenyi multiple comparisons test	>0.9999	0.0174	0.1488
26	move forward then left turn	3.77±0.57	1.84±0.19	1.87±0.43	2.08±0.4	2.23±0.4	1.61±0.31	2.79±0.4	0.91±0.36	1.83±0.25	One-factor ANOVA followed by Tukey's multiple comparisons test	0.9589	0.6397	0.4738	One-factor ANOVA followed by Tukey's multiple comparisons test	0.0023	0.1409	0.1608	One-factor ANOVA followed by Tukey's multiple comparisons test	0.686	0.1382	0.026
27	squat then body groom	1.06±0.41	0.72±0.31	1.67±0.34	1.21±0.57	5.24±1.01	4.26±2.16	1.71±0.64	0.13±0.09	3.81±1.42	Kruskal-Wallis H test followed by Nemenyi multiple comparisons test	0.0194	0.688	0.3853	Kruskal-Wallis H test followed by Nemenyi multiple comparisons test	0.0367	>0.9999	0.0089	Kruskal-Wallis H test followed by Nemenyi multiple comparisons test	0.0098	0.8279	0.0002
28	pause/groom	3.34±0.71	4.82±0.85	4.07±1.53	3.37±1.03	11.9±2.76	7.02±2.67	4.99±0.7	3.57±1.21	2.78±1.25	Kruskal-Wallis H test followed by Nemenyi multiple comparisons test	0.0216	0.4415	0.6478	Kruskal-Wallis H test followed by Nemenyi multiple comparisons test	0.685	0.2875	>0.9999	One-factor ANOVA followed by Tukey's multiple comparisons test	0.0296	0.8771	0.01
29	stand up action	0.76±0.18	0.45±0.15	0.26±0.07	0.83±0.15	0.39±0.19	0.41±0.18	0.45±0.12	0.09±0.06	0.46±0.19	Kruskal-Wallis H test followed by Nemenyi multiple comparisons test	0.1367	0.1614	>0.9999	Kruskal-Wallis H test followed by Nemenyi multiple comparisons test	0.0309	>0.9999	0.0646	Kruskal-Wallis H test followed by Nemenyi multiple comparisons test	>0.9999	0.0214	0.1918
30	rear up to wall	1.53±0.26	1±0.16	0.83±0.19	1.92±0.64	0.97±0.15	0.65±0.13	1.14±0.20	0.2±0.09	2.05±0.58	One-factor ANOVA followed by Tukey's multiple comparisons test	0.217	0.0772	0.8362	Kruskal-Wallis H test followed by Nemenyi multiple comparisons test	0.0226	0.7721	0.0004	Kruskal-Wallis H test followed by Nemenyi multiple comparisons test	>0.9999	0.0111	0.0118
31	pause/slight move	2.74±0.69	3.2±0.88	2.47±1	3.68±1.11	4.59±1.39	2.35±1.03	5.23±1.82	10.29±4.84	4.52±1.31	Kruskal-Wallis H test followed by Nemenyi multiple comparisons test	>0.9999	>0.9999	0.4692	Kruskal-Wallis H test followed by Nemenyi multiple comparisons test	>0.9999	>0.9999	>0.9999	Kruskal-Wallis H test followed by Nemenyi multiple comparisons test	>0.9999	>0.9999	>0.9999
32	groom/pause/rear up	2.45±0.89	3.42±1.05	4.54±1.66	3.83±1.03	2.58±1.4	5.42±2.77	2.38±0.76	3.91±1.65	7.58±1.48	Kruskal-Wallis H test followed by Nemenyi multiple comparisons test	0.818	>0.9999	>0.9999	Kruskal-Wallis H test followed by Nemenyi multiple comparisons test	>0.9999	0.0294	0.1426	Kruskal-Wallis H test followed by Nemenyi multiple comparisons test	>0.9999	>0.9999	>0.9999
33	begin to rear up	0.52±0.17	0.23±0.08	0.4±0.18	0.77±0.37	0.26±0.21	0.5±0.2	0.23±0.08	0.03±0.02	0.54±0.12	Kruskal-Wallis H test followed by Nemenyi multiple comparisons test	0.4717	>0.9999	0.8009	Kruskal-Wallis H test followed by Nemenyi multiple comparisons test	0.3907	0.1367	0.0013	Kruskal-Wallis H test followed by Nemenyi multiple comparisons test	0.7698	0.1068	>0.9999
34	scrunch then right turn	0.43±0.15	0.67±0.25	0.3±0.12	0.51±0.2	0.48±0.16	0.26±0.16	0.5±0.19	0.14±0.08	0.64±0.21	Kruskal-Wallis H test followed by Nemenyi multiple comparisons test	>0.9999	>0.9999	0.7034	Kruskal-Wallis H test followed by Nemenyi multiple comparisons test	0.2812	>0.9999	0.1318	Kruskal-Wallis H test followed by Nemenyi multiple comparisons test	>0.9999	0.0545	0.1523
35	slow move	3.87±0.33	2.39±0.23	2.08±0.28	2.22±0.46	1.94±0.41	2.11±0.23	2.87±0.5	1.72±0.42	1.54±0.31	One-factor ANOVA followed by Tukey's multiple comparisons test	0.8618	0.9754	0.949	One-factor ANOVA followed by Tukey's multiple comparisons test	0.155	0.0878	0.9493	One-factor ANOVA followed by Tukey's multiple comparisons test	0.6618	0.4109	0.9056
36	lunge forward	2.45±0.25	0.76±0.15	0.97±0.24	1.29±0.33	1.24±0.66	1.03±0.41	1.78±0.45	0.22±0.09	1.58±0.39	Kruskal-Wallis H test followed by Nemenyi multiple comparisons test	0.8902	0.9921	>0.9999	One-factor ANOVA followed by Tukey's multiple comparisons test	0.0117	0.9141	0.0286	Kruskal-Wallis H test followed by Nemenyi multiple comparisons test	>0.9999	0.0342	0.1103
37	squat and sit upright	2.66±0.53	6.3±1.4	5.93±1.69	4.41±0.52	1.27±0.42	4.53±1.07	3.22±1.16	1.94±0.9	9.13±1.64	One-factor ANOVA followed by Tukey's multiple comparisons test	0.0163	0.9919	0.0124	Kruskal-Wallis H test followed by Nemenyi multiple comparisons test	>0.9999	0.038	0.0053	Kruskal-Wallis H test followed by Nemenyi multiple comparisons test	0.0148	0.028	>0.9999
38	slow move then stop	5.6±0.88	5.75±0.74	5±0.51	7.79±1.38	5.56±0.83	4.62±0.55	4.83±0.87	7.99±3.41	3.68±0.9	One-factor ANOVA followed by Tukey's multiple comparisons test	0.2667	0.0813	0.7802	Kruskal-Wallis H test followed by Nemenyi multiple comparisons test	>0.9999	>0.9999	>0.9999	Kruskal-Wallis H test followed by Nemenyi multiple comparisons test	>0.9999	>0.9999	>0.9999
39	right-angle turn	2.48±0.43	1.39±0.29	1.79±0.4	1.56±0.52	1.05±0.28	1.09±0.25	2.36±0.45	1.45±0.55	1.81±0.33	Kruskal-Wallis H test followed by Nemenyi multiple comparisons test	>0.9999	>0.9999	>0.9999	One-factor ANOVA followed by Tukey's multiple comparisons test	0.3426	0.6732	0.8336	One-factor ANOVA followed by Tukey's multiple comparisons test	0.8121	0.9951	0.7589
40	quick move	0.23±0.09	0.03±0.02	0.06±0.03	0.06±0.03	0.58±0.58	0.07±0.05	0.32±0.11	0±0	0.32±0.1	Kruskal-Wallis H test followed by Nemenyi multiple comparisons test	0.5183	>0.9999	0.4645	Kruskal-Wallis H test followed by Nemenyi multiple comparisons test	0.0092	>0.9999	0.0072	Kruskal-Wallis H test followed by Nemenyi multiple comparisons test	0.3749	0.2437	>0.9999
