# Supplementary material
Source: Research Square preprint supplement (doi:10.21203/rs.3.rs-9128688/v1)
Supplement: Supplementary file 3 [file cd8132e5ffee1ecab1f14040.xlsx]

## Sheet: c-Fos mapping
Comparison of c-Fos expression in brain regions related to groom behavior across different groups related to Figure 2
Brain regions							WT vs. KO	Control vs. Restraint
ACA	CH(Cerebrum)	CTX(Cerebral cortex)	CTXpl(Cortical plate)	Isocortex	ACA(Anterior cingulate area)		0.0424799	0.331437
AI	CH(Cerebrum)	CTX(Cerebral cortex)	CTXpl(Cortical plate)	Isocortex	AI(Agranular insular area)		0.060726	0.000382361
AIP	CH(Cerebrum)	CTX(Cerebral cortex)	CTXpl(Cortical plate)	Isocortex	AI(Agranular insular area)	AIP(Agranular insular area, posterior part)	0.891539	0.466168
AON	CH(Cerebrum)	CTX(Cerebral cortex)	CTXpl(Cortical plate)	OLF(Olfatory areas)	AON(Anterior olfactory nucleus)		0.427017	NA
APr	CH(Cerebrum)	CTX(Cerebral cortex)	CTXpl(Cortical plate)	HPF(Hippocampal formation)	RHP(Retrohippocampal region)	Apr(Area prostriata)	0.328902	0.811252
AUD	CH(Cerebrum)	CTX(Cerebral cortex)	CTXpl(Cortical plate)	Isocortex	AUD(Auditory areas)		0.0110735	0.0382374
BLA	CH(Cerebrum)	CTX(Cerebral cortex)	CTXsp(Cortical subplate)	BLA(Basolateral amygdalar nucleus)			0.0376931	0.00527083
BMA	CH(Cerebrum)	CTX(Cerebral cortex)	CTXsp(Cortical subplate)	BMA(Basomedial amygdalar nucleus)			0.393795	0.141808
CA	CH(Cerebrum)	CTX(Cerebral cortex)	CTXpl(Cortical plate)	HPF(Hippocampal formation)	HIP(Hippocampal region)	CA(Ammon's horn)	0.0466817	0.427731
CLA	CH(Cerebrum)	CTX(Cerebral cortex)	CTXsp(Cortical subplate)	CLA(Claustrum)			0.0444344	0.191467
COA	CH(Cerebrum)	CTX(Cerebral cortex)	CTXpl(Cortical plate)	OLF(Olfatory areas)	COA(Cortical amygdalar area)		0.0278459	0.0236859
DG	CH(Cerebrum)	CTX(Cerebral cortex)	CTXpl(Cortical plate)	HPF(Hippocampal formation)	HIP(Hippocampal region)	DG(Dentate gyrus)	0.0172391	0.0302031
DP	CH(Cerebrum)	CTX(Cerebral cortex)	CTXpl(Cortical plate)	OLF(Olfatory areas)	DP(Dorsal peduncular area)		0.215211	0.0244561
ECT	CH(Cerebrum)	CTX(Cerebral cortex)	CTXpl(Cortical plate)	Isocortex	ECT(Ectohinal area)		0.0322884	0.0068928
ENT	CH(Cerebrum)	CTX(Cerebral cortex)	CTXpl(Cortical plate)	HPF(Hippocampal formation)	RHP(Retrohippocampal region)	ENT(Entorhinal area)	0.00181696	0.182972
EP	CH(Cerebrum)	CTX(Cerebral cortex)	CTXsp(Cortical subplate)	EP(Endopiriform nucelus)			0.0458023	0.262543
FRP	CH(Cerebrum)	CTX(Cerebral cortex)	CTXpl(Cortical plate)	Isocortex	FRP(Frontal pole,cerebral cortex)		0.322228	0.339928
GU	CH(Cerebrum)	CTX(Cerebral cortex)	CTXpl(Cortical plate)	Isocortex	GU(Gustatory areas)		0.266077	0.41787
HATA	CH(Cerebrum)	CTX(Cerebral cortex)	CTXpl(Cortical plate)	HPF(Hippocampal formation)	RHP(Retrohippocampal region)	HATA(Hippocamo-amygdalar transition area)	NA	0.509834
ILA	CH(Cerebrum)	CTX(Cerebral cortex)	CTXpl(Cortical plate)	Isocortex	ILA(Infralimbic area)		0.0269465	0.108071
LA	CH(Cerebrum)	CTX(Cerebral cortex)	CTXsp(Cortical subplate)	LA(Lateral amygdalar nucleus)			0.0329795	0.453495
MO	CH(Cerebrum)	CTX(Cerebral cortex)	CTXpl(Cortical plate)	Isocortex	MO(Somatomotor areas)		0.00405522	0.0428819
NLOT	CH(Cerebrum)	CTX(Cerebral cortex)	CTXpl(Cortical plate)	OLF(Olfatory areas)	NLOT(Nucleus of the lateral olfactory tract)		0.182946	0.318449
ORB	CH(Cerebrum)	CTX(Cerebral cortex)	CTXpl(Cortical plate)	Isocortex	ORB(Orbital area)		0.826974	0.00225651
PA	CH(Cerebrum)	CTX(Cerebral cortex)	CTXsp(Cortical subplate)	PA(Posterior amygdala nucleus)			0.0596293	0.285032
PAA	CH(Cerebrum)	CTX(Cerebral cortex)	CTXpl(Cortical plate)	OLF(Olfatory areas)	PAA(Piriform-amygdala area)		0.431957	0.00865824
PAR	CH(Cerebrum)	CTX(Cerebral cortex)	CTXpl(Cortical plate)	HPF(Hippocampal formation)	RHP(Retrohippocampal region)	PAR(Parasubiculum)	NA	NA
PERI	CH(Cerebrum)	CTX(Cerebral cortex)	CTXpl(Cortical plate)	Isocortex	PERI(Perirhinal area)		0.0416362	0.0374772
PIR	CH(Cerebrum)	CTX(Cerebral cortex)	CTXpl(Cortical plate)	OLF(Olfatory areas)	PIR(Piriform area)		0.431451	0.0264751
PL	CH(Cerebrum)	CTX(Cerebral cortex)	CTXpl(Cortical plate)	Isocortex	PL(Prelimbic area)		0.0975633	NA
RSP	CH(Cerebrum)	CTX(Cerebral cortex)	CTXpl(Cortical plate)	Isocortex	RSP(Retrosplenial area)		0.170656	0.000655752
SS	CH(Cerebrum)	CTX(Cerebral cortex)	CTXpl(Cortical plate)	Isocortex	SS(Somatosensory areas)		0.0011014	0.0481494
TEa	CH(Cerebrum)	CTX(Cerebral cortex)	CTXpl(Cortical plate)	Isocortex	TEa(Temporal association areas)		0.0259717	0.0038083
TR	CH(Cerebrum)	CTX(Cerebral cortex)	CTXpl(Cortical plate)	OLF(Olfatory areas)	TR(Postpiriform transition area)		0.585483	0.487394
TTd	CH(Cerebrum)	CTX(Cerebral cortex)	CTXpl(Cortical plate)	OLF(Olfatory areas)	TT(Taenia tecta)	TTd(Taenia tecta, dorsal part)	0.0268832	NA
TTv	CH(Cerebrum)	CTX(Cerebral cortex)	CTXpl(Cortical plate)	OLF(Olfatory areas)	TT(Taenia tecta)	TTd(Taenia tecta, ventral part)	0.70067	NA
VIS	CH(Cerebrum)	CTX(Cerebral cortex)	CTXpl(Cortical plate)	Isocortex	VIS(Visual areas)		0.326108	0.00978446
VISa	CH(Cerebrum)	CTX(Cerebral cortex)	CTXpl(Cortical plate)	Isocortex	PTLp(Posterior parietal association areas)	VISa(Anterior area)	0.0377768	0.110358
VISC	CH(Cerebrum)	CTX(Cerebral cortex)	CTXpl(Cortical plate)	Isocortex	VISC(Visceral area)		0.158949	0.141782
VISrl	CH(Cerebrum)	CTX(Cerebral cortex)	CTXpl(Cortical plate)	Isocortex	PTLp(Posterior parietal association areas)	VISrl(Rostrolateral visual area)	0.0551918	0.0465489
AAA	CH(Cerebrum)	CNU(Cerebral nuclei)	STR(Striatum)	sAMY(Striatum-like amygdalar nuclei)	AAA(Anterior amygdalar area)		0.0918656	0.0212854
ACB	CH(Cerebrum)	CNU(Cerebral nuclei)	STR(Striatum)	STRv(Striatum ventral region)	ACB(Nucleus accumbens)		0.0219743	0.0483569
BA	CH(Cerebrum)	CNU(Cerebral nuclei)	STR(Striatum)	sAMY(Striatum-like amygdalar nuclei)	BA(Bed nucleus of the accessory olfactory tract)		NA	NA
BST	CH(Cerebrum)	CNU(Cerebral nuclei)	PAL(Pallidum)	PALc(Pallidum, caudal region)	BST(Bed nuclei of the stria terminalis)		0.554491	0.796069
CEA	CH(Cerebrum)	CNU(Cerebral nuclei)	STR(Striatum)	sAMY(Striatum-like amygdalar nuclei)	CEA(Central amygdalar nucleus)		0.233128	0.239204
FS	CH(Cerebrum)	CNU(Cerebral nuclei)	STR(Striatum)	STRv(Striatum ventral region)	FS(Fundus of striatum)		0.614185	0.449122
GP	CH(Cerebrum)	CNU(Cerebral nuclei)	PAL(Pallidum)	PALd(Pallidum, dorsal region)	GP(Globus pallidus)		0.397758	0.765461
IA	CH(Cerebrum)	CNU(Cerebral nuclei)	STR(Striatum)	sAMY(Striatum-like amygdalar nuclei)	IA(Intercalated amygdalar nucleus)		0.530934	0.520844
LS	CH(Cerebrum)	CNU(Cerebral nuclei)	STR(Striatum)	LSX(Lateral septal nucleus)	LS(Lateral septal nucleus)		0.171357	0.438541
MA	CH(Cerebrum)	CNU(Cerebral nuclei)	PAL(Pallidum)	PALv(Pallidum, ventrall region)	MA(Magnocellular nucleus)		NA	0.502246
MEA	CH(Cerebrum)	CNU(Cerebral nuclei)	STR(Striatum)	sAMY(Striatum-like amygdalar nuclei)	MEA(Medial amygdalar nucleus)		0.00745725	0.0272451
MS	CH(Cerebrum)	CNU(Cerebral nuclei)	PAL(Pallidum)	PALm(Pallidum, medial region)	MSC(Medial septal complex)	MS(Medial septal nucleus)	0.0189057	0.33453
NDB	CH(Cerebrum)	CNU(Cerebral nuclei)	PAL(Pallidum)	PALm(Pallidum, medial region)	MSC(Medial septal complex)	NDB(Diagonal band nucleus)	0.0278771	0.756137
OT	CH(Cerebrum)	CNU(Cerebral nuclei)	STR(Striatum)	STRv(Striatum ventral region)	OT(Olfactory tubercle)		0.252546	0.106168
SF	CH(Cerebrum)	CNU(Cerebral nuclei)	STR(Striatum)	LSX(Lateral septal complex)	SF(Septofimbrial nucleus)		0.278027	0.0217391
SI	CH(Cerebrum)	CNU(Cerebral nuclei)	PAL(Pallidum)	PALv(Pallidum, ventrall region)	SI(Substantia innominata)		0.137506	0.655609
TRS	CH(Cerebrum)	CNU(Cerebral nuclei)	PAL(Pallidum)	PALm(Pallidum, medial region)	TRS(Triangular nucleus of septum)		0.734492	0.361304
AM	BS(Brain stem)	IB(Interbrain)	TH(Thalamus)	DORpm(Thalamus, polymodal association cortex related)	ATN(Anterior group of the dorsal thalamus)	AM(Anteromedial nucleus)	0.273401	0.0093425
AV	BS(Brain stem)	IB(Interbrain)	TH(Thalamus)	DORpm(Thalamus, polymodal association cortex related)	ATN(Anterior group of the dorsal thalamus)	AV(Anteroventral nucleus of thalamus)	0.456797	0.552649
CL	BS(Brain stem)	IB(Interbrain)	TH(Thalamus)	DORpm(Thalamus, polymodal association cortex related)	ILM(Intralaminar nucleus of the dorsal thalamus)	CL(Central lateral nucleus of the thalamus)	0.216152	0.819598
CM	BS(Brain stem)	IB(Interbrain)	TH(Thalamus)	DORpm(Thalamus, polymodal association cortex related)	ILM(Intralaminar nucleus of the dorsal thalamus)	CM(Central medial nucleus of the thalamus)	0.331307	0.58642
Eth	BS(Brain stem)	IB(Interbrain)	TH(Thalamus)	DORpm(Thalamus, polymodal association cortex related)	LAT(Lateral group of the dorsal thalamus)	Eth(Ethmoid nucleus of the thalamus)	0.0163417	0.37305
IAD	BS(Brain stem)	IB(Interbrain)	TH(Thalamus)	DORpm(Thalamus, polymodal association cortex related)	ATN(Anterior group of the dorsal thalamus)	IAD(Interanterodorsal nucleus of the thalamus)	0.809541	0.261083
IAM	BS(Brain stem)	IB(Interbrain)	TH(Thalamus)	DORpm(Thalamus, polymodal association cortex related)	ATN(Anterior group of the dorsal thalamus)	IAM(Interanteromedial nucleus of the thalamus)	0.361648	0.0384996
IGL	BS(Brain stem)	IB(Interbrain)	TH(Thalamus)	DORpm(Thalamus, polymodal association cortex related)	GENv(Geniculate group, ventral thalamus)	IGL(Intergeniculate leaflet of the lateral geniculate complex)	NA	NA
IMD	BS(Brain stem)	IB(Interbrain)	TH(Thalamus)	DORpm(Thalamus, polymodal association cortex related)	MED(Medial group of the dorsal thalamus)	IMD(Intermediodorsal nucleius)	0.00819557	0.139575
LD	BS(Brain stem)	IB(Interbrain)	TH(Thalamus)	DORpm(Thalamus, polymodal association cortex related)	ATN(Anterior group of the dorsal thalamus)	LD(Lateral dorsal nucleus of thalamus)	0.0591344	0.322716
LGd	BS(Brain stem)	IB(Interbrain)	TH(Thalamus)	DORsm(Thalamus, sensory-motor cortex related)	GENd(Geniculate group, dorsal thalamus)	LGd(Dorsal part of the lateral geniculate complex)	NA	0.425084
LGv	BS(Brain stem)	IB(Interbrain)	TH(Thalamus)	DORsm(Thalamus, sensory-motor cortex related)	GENv(Geniculate group, ventral thalamus)	LGv(Ventral part of the lateral geniculate complex)	0.0921323	0.454811
LH	BS(Brain stem)	IB(Interbrain)	TH(Thalamus)	DORpm(Thalamus, polymodal association cortex related)	EPI(Epithalamus)	LH(Lateral habenula)	0.178102	0.233504
LP	BS(Brain stem)	IB(Interbrain)	TH(Thalamus)	DORpm(Thalamus, polymodal association cortex related)	LAT(Lateral group of the dorsal thalamus)	LP(Lateral posterior nucleus of the thalamus)	0.232889	0.395761
MD	BS(Brain stem)	IB(Interbrain)	TH(Thalamus)	DORpm(Thalamus, polymodal association cortex related)	MED(Medial group of the dorsal thalamus)	MD(Mediodorsal nucleus of thalamus)	0.0109299	0.00805657
MG	BS(Brain stem)	IB(Interbrain)	TH(Thalamus)	DORsm(Thalamus, sensory-motor cortex related)	GENd(Geniculate group, dorsal thalamus)	MG(Medial geniculate complex)	NA	NA
MH	BS(Brain stem)	IB(Interbrain)	TH(Thalamus)	DORpm(Thalamus, polymodal association cortex related)	EPI(Epithalamus)	MH(Medial habenula)	0.615962	0.481404
PCN	BS(Brain stem)	IB(Interbrain)	TH(Thalamus)	DORpm(Thalamus, polymodal association cortex related)	ILM(Intralaminar nucleus of the dorsal thalamus)	PCN(Paracentral nucleus)	NA	NA
PF	BS(Brain stem)	IB(Interbrain)	TH(Thalamus)	DORpm(Thalamus, polymodal association cortex related)	ILM(Intralaminar nucleus of the dorsal thalamus)	PF(Parafascicular nucleus)	NA	NA
PO	BS(Brain stem)	IB(Interbrain)	TH(Thalamus)	DORpm(Thalamus, polymodal association cortex related)	LAT(Lateral group of the dorsal thalamus)	PO(Posterior complex of the thalamus)	0.893304	NA
POL	BS(Brain stem)	IB(Interbrain)	TH(Thalamus)	DORpm(Thalamus, polymodal association cortex related)	LAT(Lateral group of the dorsal thalamus)	POL(Posterior limiting nucleus of the thalamus)	NA	NA
PoT	BS(Brain stem)	IB(Interbrain)	TH(Thalamus)	DORsm(Thalamus, sensory-motor cortex related)	VENT(Ventral group of the dorsal thalamus)	PoT(Posterior triangular thalamic nucleus)	NA	NA
PP	BS(Brain stem)	IB(Interbrain)	TH(Thalamus)	DORsm(Thalamus, sensory-motor cortex related)	PP(Peripeduncular nucleus)		0.901136	0.212864
PVT	BS(Brain stem)	IB(Interbrain)	TH(Thalamus)	DORpm(Thalamus, polymodal association cortex related)	MTN(Midline group of the dorsal thalamus)	PVT(Paraventricular nucleus of the thalamus)	0.704348	0.529933
RE	BS(Brain stem)	IB(Interbrain)	TH(Thalamus)	DORpm(Thalamus, polymodal association cortex related)	MTN(Midline group of the dorsal thalamus)	RE(Nucleus of reuniens)	0.365131	0.503753
RH	BS(Brain stem)	IB(Interbrain)	TH(Thalamus)	DORpm(Thalamus, polymodal association cortex related)	ILM(Intralaminar nucleus of the dorsal thalamus)	RH(Rhomboid nucleus)	0.0374158	0.817351
RT	BS(Brain stem)	IB(Interbrain)	TH(Thalamus)	DORpm(Thalamus, polymodal association cortex related)	RT(Reticular nucleus of the thalamus)		0.590033	0.477707
SGN	BS(Brain stem)	IB(Interbrain)	TH(Thalamus)	DORpm(Thalamus, polymodal association cortex related)	LAT(Lateral group of the dorsal thalamus)	SGN(Suprageniculate nucleus)	NA	NA
SMT	BS(Brain stem)	IB(Interbrain)	TH(Thalamus)	DORpm(Thalamus, polymodal association cortex related)	MED(Medial group of the dorsal thalamus)	SMT(Submedial nucleus of the thalamus)	0.0336591	0.05091
SPF	BS(Brain stem)	IB(Interbrain)	TH(Thalamus)	DORsm(Thalamus, sensory-motor cortex related)	SPF(Subparafascicular nucleus)		0.497184	0.87785
VAL	BS(Brain stem)	IB(Interbrain)	TH(Thalamus)	DORsm(Thalamus, sensory-motor cortex related)	VENT(Ventral group of the dorsal thalamus)	VAL(Ventral anterior-lateral complex of the tahlamus)	0.0428624	NA
VM	BS(Brain stem)	IB(Interbrain)	TH(Thalamus)	DORsm(Thalamus, sensory-motor cortex related)	VENT(Ventral group of the dorsal thalamus)	VM(Ventral medial nucleus of the thalamus)	0.784937	0.91762
VPL	BS(Brain stem)	IB(Interbrain)	TH(Thalamus)	DORsm(Thalamus, sensory-motor cortex related)	VENT(Ventral group of the dorsal thalamus)	VPL(Ventral posterolateral nucleus of the thalamus)	0.640464	0.0411452
VPM	BS(Brain stem)	IB(Interbrain)	TH(Thalamus)	DORsm(Thalamus, sensory-motor cortex related)	VENT(Ventral group of the dorsal thalamus)	VPM(Ventral posteromedial nucleus of the thalamus)	0.49945	NA
ADP	BS(Brain stem)	IB(Interbrain)	HY(Hypothalamus)	PVR(Periventricular region)	ADP(Anterodorsal preoptic nucleus)		0.217662	0.21526
AHN	BS(Brain stem)	IB(Interbrain)	HY(Hypothalamus)	MEZ(Hypothalamic medial zone)	AHN(Anterior hypothalamic nucleus)		0.355614	0.71033
ARH	BS(Brain stem)	IB(Interbrain)	HY(Hypothalamus)	PVZ(Periventricular zone)	ARH(Arcuate hypothalamic nucleus)		0.0239338	0.53665
AVP	BS(Brain stem)	IB(Interbrain)	HY(Hypothalamus)	PVR(Periventricular region)	AVP(Anteroventral preoptic nucleus)		0.21665	0.0620085
AVPV	BS(Brain stem)	IB(Interbrain)	HY(Hypothalamus)	PVR(Periventricular region)	AVPV(Anteroventral periventricular nucleus)		0.928415	0.447001
DMH	BS(Brain stem)	IB(Interbrain)	HY(Hypothalamus)	PVR(Periventricular region)	DMH(Dorsomedial nucleus of the hypothalamus)		0.637192	0.554789
FF	BS(Brain stem)	IB(Interbrain)	HY(Hypothalamus)	LZ(Hypothalamic lateral zone)	ZI(Zona incerta)	FF(Fields of Forel)	NA	NA
LHA	BS(Brain stem)	IB(Interbrain)	HY(Hypothalamus)	LZ(Hypothalamic lateral zone)	LHA(Lateral hypothalamic area)		0.118582	0.8988
LM	BS(Brain stem)	IB(Interbrain)	HY(Hypothalamus)	MEZ(Hypothalamic medial zone)	MBO(Mammillary body)	LM(Lateral mammillary nucleus)	NA	NA
LPO	BS(Brain stem)	IB(Interbrain)	HY(Hypothalamus)	LZ(Hypothalamic lateral zone)	LPO(Lateral preoptic area)		0.344149	0.783688
MEPO	BS(Brain stem)	IB(Interbrain)	HY(Hypothalamus)	PVR(Periventricular region)	MEPO(Median preoptic nucleus)		0.223643	0.487597
MM	BS(Brain stem)	IB(Interbrain)	HY(Hypothalamus)	MEZ(Hypothalamic medial zone)	MBO(Mammillary body)	MM(Medial mammillary nucleus)	NA	NA
MPN	BS(Brain stem)	IB(Interbrain)	HY(Hypothalamus)	MEZ(Hypothalamic medial zone)	MPN(Medial preoptic nucleus)		0.0397435	0.47502
MPO	BS(Brain stem)	IB(Interbrain)	HY(Hypothalamus)	PVR(Periventricular region)	MPO(Medial preoptic area)		0.698792	0.919935
OV	BS(Brain stem)	IB(Interbrain)	HY(Hypothalamus)	PVR(Periventricular region)	OV(Vascular organ of the lamina terminalis)		NA	NA
PeF	BS(Brain stem)	IB(Interbrain)	HY(Hypothalamus)	LZ(Hypothalamic lateral zone)	PeF(Perifornical nucleus)		0.20844	0.0291753
PH	BS(Brain stem)	IB(Interbrain)	HY(Hypothalamus)	MEZ(Hypothalamic medial zone)	PH(Posterior hypothalamic nucleus)		0.246196	NA
PMd	BS(Brain stem)	IB(Interbrain)	HY(Hypothalamus)	MEZ(Hypothalamic medial zone)	PMd(Dorsal premammillary nucleus)		NA	NA
PMv	BS(Brain stem)	IB(Interbrain)	HY(Hypothalamus)	MEZ(Hypothalamic medial zone)	PMv(Ventral premammillary nucleus)		NA	NA
PS	BS(Brain stem)	IB(Interbrain)	HY(Hypothalamus)	PVR(Periventricular region)	PS(Parastrial nucleus)		0.382658	0.583175
PSTN	BS(Brain stem)	IB(Interbrain)	HY(Hypothalamus)	LZ(Hypothalamic lateral zone)	PSTN(Parasubtahlamic nucleus)		0.16114	NA
PVa	BS(Brain stem)	IB(Interbrain)	HY(Hypothalamus)	PVZ(Periventricular zone)	PVa(Periventricular hypothalamic nucleus, anterior part)		NA	NA
PVH	BS(Brain stem)	IB(Interbrain)	HY(Hypothalamus)	PVZ(Periventricular zone)	PVH(Paraventricular hypothalamic nucleus)		0.0453588	0.48801
PVHd	BS(Brain stem)	IB(Interbrain)	HY(Hypothalamus)	MEZ(Hypothalamic medial zone)	PVHd(Paraventricular hypothalamic nucleus, desending division)		0.67726	0.548808
PVi	BS(Brain stem)	IB(Interbrain)	HY(Hypothalamus)	PVZ(Periventricular zone)	PVi(Paraventricular hypothalamic nucleus, intermediate part)		0.284459	NA
PVp	BS(Brain stem)	IB(Interbrain)	HY(Hypothalamus)	PVR(Periventricular region)	PVp(Periventricular hypothalamic nucleus,posterior part)		NA	NA
PVpo	BS(Brain stem)	IB(Interbrain)	HY(Hypothalamus)	PVR(Periventricular region)	PVpo(Periventricular hypothalamic nucleus,preoptic part)		NA	NA
RCH	BS(Brain stem)	IB(Interbrain)	HY(Hypothalamus)	LZ(Hypothalamic lateral zone)	RCH(Retrochiasmatic area)		0.676584	0.29986
SBPV	BS(Brain stem)	IB(Interbrain)	HY(Hypothalamus)	PVR(Periventricular region)	SBPV(Subparaventricular zone)		0.83864	0.0345834
SCH	BS(Brain stem)	IB(Interbrain)	HY(Hypothalamus)	PVR(Periventricular region)	SCH(Subprachiasmatic nucleus)		0.656825	NA
SO	BS(Brain stem)	IB(Interbrain)	HY(Hypothalamus)	PVZ(Periventricular zone)	SO(Supraoptic nucleus)		NA	NA
STN	BS(Brain stem)	IB(Interbrain)	HY(Hypothalamus)	LZ(Hypothalamic lateral zone)	STN(Subthalamic nucleus)		NA	NA
SUM	BS(Brain stem)	IB(Interbrain)	HY(Hypothalamus)	MEZ(Hypothalamic medial zone)	MBO(Mammillary body)	SUM(Supramammillary nucleus)	NA	NA
TM	BS(Brain stem)	IB(Interbrain)	HY(Hypothalamus)	MEZ(Hypothalamic medial zone)	MBO(Mammillary body)	TM(Tuberomammillary nucleus)	NA	NA
TU	BS(Brain stem)	IB(Interbrain)	HY(Hypothalamus)	LZ(Hypothalamic lateral zone)	TU(Tuberal nucleus)		0.0319982	0.10322
VLPO	BS(Brain stem)	IB(Interbrain)	HY(Hypothalamus)	PVR(Periventricular region)	VLPO(Ventrolateral preoptic nucleus)		0.183157	0.871728
VMH	BS(Brain stem)	IB(Interbrain)	HY(Hypothalamus)	MEZ(Hypothalamic medial zone)	VMH(Ventromedial hypothalamic nucleus)		0.257405	0.417613
ZI	BS(Brain stem)	IB(Interbrain)	HY(Hypothalamus)	LZ(Hypothalamic lateral zone)	ZI(Zona incerta)		0.126166	0.411997
APN	BS(Brain stem)	MB(Midbrain)	MBmot(Midbrain,motor related)	PRT(Pretectal region)	APN(Anterior pretectal nucleus)		NA	NA
AT	BS(Brain stem)	MB(Midbrain)	MBmot(Midbrain,motor related)	AT(Anterior tegmental nucleus)			NA	NA
CLI	BS(Brain stem)	MB(Midbrain)	MBsta(Midbrain,behavioral state related)	RAmb(Midbrain raphe nuclei)	CLI(Central linear nucleus raphe)		NA	NA
CUN	BS(Brain stem)	MB(Midbrain)	MBmot(Midbrain,motor related)	CUN(Cuneiform nucleus)			NA	0.607542
DR	BS(Brain stem)	MB(Midbrain)	MBsta(Midbrain,behavioral state related)	RAmb(Midbrain raphe nuclei)	DR(Dorsal nucleus raphe)		NA	0.570098
DT	BS(Brain stem)	MB(Midbrain)	MBmot(Midbrain,motor related)	DT(Dorsal terminal nucleus of the accessory optic tract)			NA	NA
EW	BS(Brain stem)	MB(Midbrain)	MBmot(Midbrain,motor related)	EW(Edinger-Westphal nucleus)			NA	NA
IC	BS(Brain stem)	MB(Midbrain)	MBsen(Midbrain,sensory related)	IC(Inferior colliculus)			0.47163	0.913683
IF	BS(Brain stem)	MB(Midbrain)	MBsta(Midbrain,behavioral state related)	RAmb(Midbrain raphe nuclei)	IF(Interfascicular nucleus raphe)		NA	NA
III	BS(Brain stem)	MB(Midbrain)	MBmot(Midbrain,motor related)	III(Oculomotor nucleus)			NA	NA
INC	BS(Brain stem)	MB(Midbrain)	MBmot(Midbrain,motor related)	PAG(Periaqueductal gray)	INC(Interstitial nucleus of Cajal)		NA	NA
IPN	BS(Brain stem)	MB(Midbrain)	MBsta(Midbrain,behavioral state related)	RAmb(Midbrain raphe nuclei)	IPN(Interpeduncular nucleus)		0.324341	NA
MA3	BS(Brain stem)	MB(Midbrain)	MBmot(Midbrain,motor related)	MA3(Medial accesory oculomotor nucleus)			NA	0.102077
MEV	BS(Brain stem)	MB(Midbrain)	MBsen(Midbrain,sensory related)	MEV(Midbrain trigeminal nucleus)			NA	NA
MT	BS(Brain stem)	MB(Midbrain)	MBmot(Midbrain,motor related)	MT(Medial terminal nucleus of the accessory optic tract)			NA	NA
NB	BS(Brain stem)	MB(Midbrain)	MBsen(Midbrain,sensory related)	IC(Inferior colliculus)	NB(Nucleus of the brachium of the inferior colliculus)		0.578441	NA
ND	BS(Brain stem)	MB(Midbrain)	MBmot(Midbrain,motor related)	PAG(Periaqueductal gray)	ND(Nucleus of Darkschewitsch)		NA	NA
NOT	BS(Brain stem)	MB(Midbrain)	MBmot(Midbrain,motor related)	PRT(Pretectal region)	NOT(Nucleus of the optic tract)		0.258258	0.110223
NPC	BS(Brain stem)	MB(Midbrain)	MBmot(Midbrain,motor related)	PRT(Pretectal region)	NPC(Nucleus of the posterior commissure)		NA	NA
Pa4	BS(Brain stem)	MB(Midbrain)	MBmot(Midbrain,motor related)	Pa4(Paratrochlear nucleus)			NA	NA
PAG	BS(Brain stem)	MB(Midbrain)	MBmot(Midbrain,motor related)	PAG(Periaqueductal gray)			0.46189	0.313259
PPN	BS(Brain stem)	MB(Midbrain)	MBsta(Midbrain,behavioral state related)	PPN(Pedunculopontine nucleus)			NA	0.55973
PPT	BS(Brain stem)	MB(Midbrain)	MBmot(Midbrain,motor related)	PRT(Pretectal region)	PPT(Poterior pretectal nucleus)		0.439096	NA
PRC	BS(Brain stem)	MB(Midbrain)	MBmot(Midbrain,motor related)	PAG(Periaqueductal gray)	PRC(Precommissural nucleus)		NA	NA
RL	BS(Brain stem)	MB(Midbrain)	MBsta(Midbrain,behavioral state related)	RAmb(Midbrain raphe nuclei)	RL(Rostral linear nucleus raphe)		NA	NA
RN	BS(Brain stem)	MB(Midbrain)	MBmot(Midbrain,motor related)	RN(Red nucleus)			0.369961	0.0338969
RR	BS(Brain stem)	MB(Midbrain)	MBmot(Midbrain,motor related)	RR(Midbrain reticular nucleus, retrorubral area)			NA	NA
SCm	BS(Brain stem)	MB(Midbrain)	MBmot(Midbrain,motor related)	SCm(Superior colliculus motor related)			0.279458	0.0185695
SCs	BS(Brain stem)	MB(Midbrain)	MBsen(Midbrain,sensory related)	SCs(Superior colliculus sensory related)			0.0962809	0.0746116
SNc	BS(Brain stem)	MB(Midbrain)	MBsta(Midbrain,behavioral state related)	SNc(Substantia nigra, compact part)			NA	NA
SNr	BS(Brain stem)	MB(Midbrain)	MBmot(Midbrain,motor related)	SNr(Substantia nigra, reticular part)			NA	NA
Su3	BS(Brain stem)	MB(Midbrain)	MBmot(Midbrain,motor related)	PAG(Periaqueductal gray)	Su3(Supraoculomotor periaqueductal gray)		NA	NA
VTA	BS(Brain stem)	MB(Midbrain)	MBmot(Midbrain,motor related)	VTA(Ventral tegmental area)			NA	0.84918
VTN	BS(Brain stem)	MB(Midbrain)	MBmot(Midbrain,motor related)	VTN(Ventral tegmental nucleus)			NA	NA
CS	BS(Brain stem)	HB(Hindbrain)	P(Pons)	P-sat(Pons, behavioral state related)	CS(Superior central nucleus raphe)		NA	0.20603
DTN	BS(Brain stem)	HB(Hindbrain)	P(Pons)	P-mot(Pons, motor related)	DTN(Dorsal tegmental nucleus)		NA	NA
KF	BS(Brain stem)	HB(Hindbrain)	P(Pons)	P-sent(Pons, sensory related)	PB(Parabrachial nucleus)	KF(Koelliker-Fuse subnucleus)	0.290987	0.246063
LC	BS(Brain stem)	HB(Hindbrain)	P(Pons)	P-sat(Pons, behavioral state related)	LC(Locus ceruleus)		NA	NA
LDT	BS(Brain stem)	HB(Hindbrain)	P(Pons)	P-sat(Pons, behavioral state related)	LDT(Laterodorsal tegmental nucleus)		NA	0.0219375
NI	BS(Brain stem)	HB(Hindbrain)	P(Pons)	P-sat(Pons, behavioral state related)	NI(Nucleus incertus)		0.500425	0.247517
NLL	BS(Brain stem)	HB(Hindbrain)	P(Pons)	P-sent(Pons, sensory related)	NLL(Nucleus of the lateral lemniscus)		NA	0.607231
PB	BS(Brain stem)	HB(Hindbrain)	P(Pons)	P-sent(Pons, sensory related)	PB(Parabrachial nucleus)		0.922474	0.48746
PCG	BS(Brain stem)	HB(Hindbrain)	P(Pons)	P-mot(Pons, motor related)	PCG(Pontine central gray)		0.655763	0.556892
POR	BS(Brain stem)	HB(Hindbrain)	P(Pons)	P-sent(Pons, sensory related)	SOC(Superior olivary complex)	POR(Superior olivary complex,periolivary region)	NA	0.142945
PRNc	BS(Brain stem)	HB(Hindbrain)	P(Pons)	P-mot(Pons, motor related)	PRNc(Pontine reticular nucleus, caudal part)		NA	0.261172
PRNr	BS(Brain stem)	HB(Hindbrain)	P(Pons)	P-sat(Pons, behavioral state related)	PRNr(Pontine reticular nucleus)		NA	0.374658
PSV	BS(Brain stem)	HB(Hindbrain)	P(Pons)	P-sent(Pons, sensory related)	PSV(Principal sensory nucleus of the trigeminal)		NA	0.0337689
RPO	BS(Brain stem)	HB(Hindbrain)	P(Pons)	P-sat(Pons, behavioral state related)	RPO(Nucleus raphe pontis)		0.723186	NA
SOCl	BS(Brain stem)	HB(Hindbrain)	P(Pons)	P-sent(Pons, sensory related)	SOC(Superior olivary complex)	SOCl(Superior olivary complex, lateral part)	NA	NA
SOCm	BS(Brain stem)	HB(Hindbrain)	P(Pons)	P-sent(Pons, sensory related)	SOC(Superior olivary complex)	SOCm(Superior olivary complex, medial part)	NA	NA
SUT	BS(Brain stem)	HB(Hindbrain)	P(Pons)	P-mot(Pons, motor related)	SUT(Supratrigeminal nucleus)		NA	NA
SUV	BS(Brain stem)	HB(Hindbrain)	P(Pons)	MY(medulla)	MY-mot(medulla, motor related)	VNc(Vestibular nuclei)	NA	0.54225
TRN	BS(Brain stem)	HB(Hindbrain)	P(Pons)	P-mot(Pons, motor related)	TRN(Tegmental reticular nucleus)		0.301552	0.309028
ACVII	BS(Brain stem)	HB(Hindbrain)	MY(medulla)	MY-mot(Medulla, motor related)	ACVII(Accessory facial motor nucleus)		0.933326	0.109358
AMBd	BS(Brain stem)	HB(Hindbrain)	MY(medulla)	MY-mot(medulla, motor related)	AMB(Nucleus ambiguus)	AMBd(Nucleus ambiguus, dorsal division)	NA	NA
AMBv	BS(Brain stem)	HB(Hindbrain)	MY(medulla)	MY-mot(medulla, motor related)	AMB(Nucleus ambiguus)	AMBd(Nucleus ambiguus, ventral division)	NA	NA
AP	BS(Brain stem)	HB(Hindbrain)	MY(medulla)	MY-sen(Medulla, sensory related)	AP(Area postrema)		0.927398	0.13966
CU	BS(Brain stem)	HB(Hindbrain)	MY(medulla)	MY-sen(Medulla, sensory related)	DCN(Dorsal column nuclei)	CU(Cuneate nucleus)	NA	NA
DMX	BS(Brain stem)	HB(Hindbrain)	MY(medulla)	MY-mot(medulla, motor related)	DMX(Dorsal motor nucleus of the vagus nerve)		NA	NA
ECU	BS(Brain stem)	HB(Hindbrain)	MY(medulla)	MY-sen(Medulla, sensory related)	ECU(External cuneate nucleus)		NA	NA
GR	BS(Brain stem)	HB(Hindbrain)	MY(medulla)	MY-sen(Medulla, sensory related)	DCN(Dorsal column nuclei)	GR(Gracile nucleus)	NA	NA
GRN	BS(Brain stem)	HB(Hindbrain)	MY(medulla)	MY-mot(medulla, motor related)	GRN(Gigantocelluar reticular nucleus)		0.955119	0.0143213
IO	BS(Brain stem)	HB(Hindbrain)	MY(medulla)	MY-mot(medulla, motor related)	IO(Inferior olivary complex)		NA	NA
IRN	BS(Brain stem)	HB(Hindbrain)	MY(medulla)	MY-mot(medulla, motor related)	IRN(Intermediate reticular nucleus)		0.376251	0.072366
ISN	BS(Brain stem)	HB(Hindbrain)	MY(medulla)	MY-mot(medulla, motor related)	ISN(Inferior salivatory nucleus)		NA	NA
LAV	BS(Brain stem)	HB(Hindbrain)	MY(medulla)	MY-mot(medulla, motor related)	VNc(Vestibular nuclei)	LAV(Lateral vestibular nucleus)	0.768091	0.288355
LIN	BS(Brain stem)	HB(Hindbrain)	MY(medulla)	MY-mot(medulla, motor related)	LIN(Linear nucleus of the medulla)		NA	NA
LRN	BS(Brain stem)	HB(Hindbrain)	MY(medulla)	MY-mot(medulla, motor related)	LRN(Lateral reticular nucleus)		0.196161	0.0621347
MARN	BS(Brain stem)	HB(Hindbrain)	MY(medulla)	MY-mot(medulla, motor related)	MARN(Magnocelluar reticular nucleus)		0.0332263	0.244867
MDRN	BS(Brain stem)	HB(Hindbrain)	MY(medulla)	MY-mot(medulla, motor related)	MDRN(Medullary reticular nucleus)		0.378477	0.262592
MRN	BS(Brain stem)	HB(Hindbrain)	MY(medulla)	MY-mot(medulla, motor related)	MRN(Midbrain reticular nucleus)		0.697204	0.545615
MV	BS(Brain stem)	HB(Hindbrain)	MY(medulla)	MY-mot(medulla, motor related)	VNc(Vestibular nuclei)	MV(Medial vestibular nucleus)	NA	0.786911
NR	BS(Brain stem)	HB(Hindbrain)	MY(medulla)	MY-mot(medulla, motor related)	PHY(Perihypoglossal nuclei)	NR(Nucleus of Roller)	NA	NA
NTB	BS(Brain stem)	HB(Hindbrain)	MY(medulla)	MY-sen(Medulla, sensory related)	NTB(Nucleus of the trapezoid)		NA	0.705037
NTS	BS(Brain stem)	HB(Hindbrain)	MY(medulla)	MY-sen(Medulla, sensory related)	NTS(Nucleus of the solitary tract)		0.854323	0.199583
Pa5	BS(Brain stem)	HB(Hindbrain)	MY(medulla)	MY-sen(Medulla, sensory related)	Pa5(Paratrigeminal nucleus)		0.544234	0.954993
PARN	BS(Brain stem)	HB(Hindbrain)	MY(medulla)	MY-mot(medulla, motor related)	PARN(Parvicellular reticular nucleus)		0.515683	0.0550228
PAS	BS(Brain stem)	HB(Hindbrain)	MY(medulla)	MY-mot(medulla, motor related)	PAS(Parasolitary nucleus)		NA	NA
PGRN	BS(Brain stem)	HB(Hindbrain)	MY(medulla)	MY-mot(medulla, motor related)	PGRN(Paragigantocelluar reticular nucleus)		0.579574	0.0136998
PPY	BS(Brain stem)	HB(Hindbrain)	MY(medulla)	MY-mot(medulla, motor related)	PPY(Parapyramidal nucleus)		NA	NA
PRP	BS(Brain stem)	HB(Hindbrain)	MY(medulla)	MY-mot(medulla, motor related)	PHY(Perihypoglossal nuclei)	PRP(Nucleus prepositus)	0.885267	0.810162
RM	BS(Brain stem)	HB(Hindbrain)	MY(medulla)	MY-sat(medulla, behavioral state related)	RM(Nucleus raphe magnus)		0.607406	0.80584
RO	BS(Brain stem)	HB(Hindbrain)	MY(medulla)	MY-sat(medulla, behavioral state related)	RO(Nucleus raphe obscurus)		NA	NA
RPA	BS(Brain stem)	HB(Hindbrain)	MY(medulla)	MY-sat(medulla, behavioral state related)	RPA(Nucleus raphe pallidus)		0.0961926	0.311483
SPIV	BS(Brain stem)	HB(Hindbrain)	MY(medulla)	MY-mot(medulla, motor related)	VNc(Vestibular nuclei)	SPIV(Spinal vestibular nucleus)	0.41794	0.0306276
SPVC	BS(Brain stem)	HB(Hindbrain)	MY(medulla)	MY-sen(Medulla, sensory related)	SPVC(Spinal nucleus of the trigeminal, caudal part)		0.46899	NA
SPVI	BS(Brain stem)	HB(Hindbrain)	MY(medulla)	MY-sen(Medulla, sensory related)	SPVI(Spinal nucleus of the trigeminal, interpolar part)		0.796366	0.257684
SPVO	BS(Brain stem)	HB(Hindbrain)	MY(medulla)	MY-sen(Medulla, sensory related)	SPVO(Spinal nucleus of the trigeminal, oral part)		NA	0.228063
VII	BS(Brain stem)	HB(Hindbrain)	MY(medulla)	MY-mot(medulla, motor related)	VII(Facial motor nucleus)		0.933326	0.202531
x	BS(Brain stem)	HB(Hindbrain)	MY(medulla)	MY-mot(medulla, motor related)	x(Nucleus x)		NA	NA
XII	BS(Brain stem)	HB(Hindbrain)	MY(medulla)	MY-mot(medulla, motor related)	XII(Hypoglossal nucleus)		NA	NA
CENT	CB(Cerebellum)	CBN(Cerebellar nuclei	VERM(Vermal regions)	CENT(Central lobule)			0.629862	0.219117
FN	CB(Cerebellum)	CBN(Cerebellar nuclei	FN(Fastigial nucleus)				NA	NA
NOD	CB(Cerebellum)	CBX(Cerebellar cortex)	VERM(Vermal redions)	NOD(Nodulus(X))			NA	NA
IP	CB(Cerebellum)	CBN(Cerebellar nuclei	IP(Interposed nucleus)				0.891539	0.466168
VeCB	CB(Cerebellum)	CBN(Cerebellar nuclei	VeCB(Vestibulocerebellar nucleus)				0.938015	0.905507
DN	CB(Cerebellum)	CBN(Cerebellar nuclei	DN(IDentate nucleus)				NA	NA

## Sheet: Network centrality metrics
Network centrality metrics of different gruops related to Figure 2
WT vs. KO						Control vs. Restraint
Brain	degree	betweenness centrality	eigenvector centrality	Sorting		Brain	degree	betweenness centrality	eigenvector centrality	Sorting
MARN	16	0.0107901	0.478872	33		SF	3	0.00765489	0.352755	34
ACA	8	0.00353182	0.228692	32		PIR	6	0.00831796	0.109607	33
PVH	8	0.00132021	0.309694	31		PERI	4	0.00329424	0.382093	32
TEa	8	0.00140925	0.301106	30		AI	4	0.0051461	0.255209	31
VAL	7	0.00115843	0.284919	29		VISrl	3	0.0032945	0.42163	30
MO	6	0.00715619	0.190393	28		GRN	1	0.00792853	0.318077	29
Eth	7	0.000713409	0.205904	27		SBPV	1	0.00594474	0.130212	28
MD	6	0.00607309	0.0358312	26		DG	4	0.00255261	0.0525	27
MPN	6	0.00293279	0.0906504	25		SCm	1	0.00376952	0.0913706	26
ARH	6	0.00018704	0.219907	24		BLA	4	0.000263402	0.334269	25
VISa	7	9.43801e-05	0.289789	23		MO	3	0.00160275	0.0700723	24
PERI	5	0.00722736	0.0867696	22		VPL	1	0.00375964	0.102465	23
MEA	6	0.00515972	0.0136039	21		PGRN	0	0.00632994	0.0721114	22
ECT	5	0.00344086	0.15287	20		TEa	2	0.00340596	0.00969449	21
ILA	5	0.00372836	0.12901	19		MD	0	0.00334168	0.329401	20
CLA	6	0.00017381	0.221259	18		AUD	3	0.000329067	0.187552	19
RH	6	0.000113861	0.195019	17		VIS	1	0.00524443	0.0171964	18
IMD	5	0.00159553	0.0240736	16		COA	2	0.00271795	0.00395605	17
SMT	5	0.000358843	0.140969	15		PSV	0	0.00135957	0.147914	16
ENT	4	0.00201353	0.114854	14		IAM	0	0.00469348	0.0465125	15
ACB	5	0.00161865	0.00529778	13		AAA	2	0.000404445	0.044341	14
TU	3	0.00213392	0.0206513	12		PAA	2	0.00115962	1.2462e-16	13
LA	5	0.000128109	0.169219	11		ECT	1	0.000329067	0.195716	12
DG	6	0.000184689	0.0139068	10		AM	1	0.000421441	0.0450468	11
EP	4	0.000180729	0.144136	9		DP	2	0.000318979	0.0345367	10
MS	5	0.000378736	0.00527025	8		MEA	1	0.000533201	0.0142866	9
AUD	3	0.000122903	0.106643	7		SS	1	0.00115962	1.63625e-16	8
COA	3	0.000556038	0.00173022	6		PeF	1	0.000897767	5.76852e-18	7
CA	2	0.000224058	0.0176448	5		SPIV	0	0.00115962	3.23665e-17	6
SS	2	0.000457046	0.00344578	4		RSP	0	0.000355997	0.0352613	5
NDB	1	0	0	3		ORB	0	0.000962996	0.000914535	4
TTd	1	0	0	2		ACB	0	0.000876731	0.00193781	3
BLA	1	0	5.73972e-41	1		LDT	0	0.000897767	0	2
						RN	0	0	0	1

## Sheet: Upstream of DLS
Upstream of DLS related to Figure 2
Brain regions	BLA	BMA	PV	IMD	CM	CL/PC	MDL	MDC	MDM	Cg1	M2	M1	S1HL	S1FL	S1DZ	S1ULp	S1BF	S1Tr	S1SNc	S2	GI	DI	AID	AIV	AIP	Cl	RSG	RSA	MPtA	LPtA	Ect	PRh	Au1	AuV	V2MM	V2ML	V1	V2L	PF	PrL	FrA	MO	VO	LO
Minimum	117.1	29.57	31.75	17.02	13.75	59.01	26.58	139.5	34.38	26.7	93.53	72.92	92.52	67.63	42.13	64.68	44.1	114.3	109.3	40.99	51.43	24.51	42.9	5.698	11.59	3.559	3.373	35.76	64.27	92.31	101.4	17.17	2.689	9.505	26.74	12.92	0	0	2.877	7.893	10.4	3.911	3.457	6.221
25% Percentile	164.1	33.68	31.75	17.02	26.24	91.92	30.17	147.4	34.38	48.41	249	131.2	130.7	130.3	42.13	68.57	87.5	189.3	109.3	82.88	63.07	95.39	86.02	7.217	11.59	31.83	19.45	59.33	71.78	118.1	121.3	30.68	3.903	9.821	29	13.5	1.928	0.6168	2.877	8.895	13.48	3.911	3.52	8.024
Median	245.9	46.48	33.95	18.38	91.15	210.3	125.6	209.7	196.2	90.09	308.3	195.7	262.4	200	235.1	75.1	128.3	344.5	137.2	185.6	92.01	112.5	105.6	18.38	51.18	44.82	25.84	78.74	102.6	168.5	147.3	61.86	9.039	13.94	43.87	26.15	10.81	2.754	12.32	10.69	48.28	4.158	7.362	26.92
75% Percentile	278	241.2	36.14	19.74	220.9	287.6	257.1	337.2	265.5	139.8	421.4	291.2	503.5	265.8	371.7	150	212.6	444.5	165.1	241.4	119.9	121.2	110.9	24.5	108.3	82.03	45.05	111.9	147.2	194.7	300	128.2	13.03	23.8	96.58	91.29	32.03	11.01	21.76	30.93	77.92	4.404	9.262	80.98
Maximum	346.9	305.9	36.14	19.74	303.6	369.3	272.7	366.9	265.5	313	500	738.5	578.2	331.3	371.7	509.1	274.9	506.3	165.1	329.4	123.2	186.9	132.9	38.88	108.3	130.4	60.61	117.9	167.9	229.5	371.1	177.4	13.87	26.02	132.7	95.16	35.54	15.22	21.76	49.49	83.38	4.404	11.06	88.69
Range	229.8	276.4	4.399	2.716	289.9	310.3	246.1	227.3	231.1	286.3	406.5	665.6	485.6	263.7	329.5	444.4	230.8	392	55.8	288.4	71.72	162.3	89.99	33.18	96.74	126.9	57.23	82.1	103.6	137.2	269.7	160.2	11.18	16.52	106	82.24	35.54	15.22	18.88	41.6	72.98	0.4933	7.6	82.47
Mean	234	107.1	33.95	18.38	120.6	206.9	137.6	231.4	165.4	108.3	311.6	240.9	298.9	198.4	216.3	149	143.9	324.6	137.2	168.2	90.72	108.5	97.63	18.09	57.04	52.31	29.74	81.19	108.7	161.5	190	74.73	8.659	15.85	59.01	47.14	15.74	5.202	12.32	18.07	46.82	4.158	6.585	39.3
Std. Deviation	74.13	132.8	3.11	1.92	109.9	111	122.7	101.2	118.6	80.2	114.2	173.1	203.2	93.27	165.6	161.7	75.64	144.1	39.45	90.82	28.13	44.4	23.31	10.65	48.63	37.05	17.94	28.6	39.62	47.36	103.6	58.54	4.744	7.554	43.24	40.72	15.56	6.159	13.35	17.64	30.97	0.3488	3.169	35.76
Std. Error of Mean	26.21	66.4	2.199	1.358	44.85	39.25	61.37	50.61	68.48	24.18	29.5	43.28	101.6	41.71	95.6	61.12	23.92	58.82	27.9	25.19	11.49	15.7	7.027	3.367	28.08	10.69	6.343	10.11	16.17	19.33	39.14	22.13	2.372	3.777	19.34	18.21	6.959	2.755	9.442	7.889	12.64	0.2467	1.417	14.6
Lower 95% CI of mean	172.1	-104.2	6.001	1.127	5.287	114.1	-57.69	70.37	-129.3	54.44	248.4	148.6	-24.38	82.63	-195	-0.5712	89.76	173.4	-217.3	113.3	61.2	71.37	81.97	10.48	-63.78	28.77	14.74	57.28	67.08	111.8	94.26	20.59	1.11	3.832	5.318	-3.419	-3.577	-2.446	-107.7	-3.836	14.32	1.023	2.65	1.775
Upper 95% CI of mean	296	318.4	61.89	35.63	235.9	299.7	332.9	392.5	460	162.2	374.9	333.1	622.2	314.2	627.6	298.5	198	475.8	491.7	223.1	120.2	145.6	113.3	25.71	177.9	75.85	44.73	105.1	150.2	211.2	285.8	128.9	16.21	27.87	112.7	97.71	35.07	12.85	132.3	39.97	79.33	7.292	10.52	76.82
